# Supplementary material for: Radical cyclization/bis(pentafluoroethylation) of 1,6-dienes using HCF2CF3-derived CuCF2CF3
Source: Royal Society of Chemistry journal article supplement (doi:10.1039/d2qo00919f), 2022-01-01

## Radical Cyclization/Bis(pentafluoroethylation) of 1,6-Dienes Using HCF<sub>2</sub>CF<sub>3</sub>-Derived CuCF<sub>2</sub>CF<sub>3</sub>

Ziwei Luo and Gavin Chit Tsui\*

Department of Chemistry, The Chinese University of Hong Kong, Shatin, New Territories, Hong Kong SAR

### Table of Contents

|                                                  |     |
|--------------------------------------------------|-----|
| General Experimental .....                       | S1  |
| Materials .....                                  | S1  |
| Instrumentation .....                            | S1  |
| Experimental Procedure .....                     | S2  |
| Substrate table .....                            | S5  |
| Control Experiment .....                         | S8  |
| X-ray Structure of <b>2c</b> and <b>4g</b> ..... | S12 |
| Characterization Data of Products .....          | S14 |
| References .....                                 | S26 |
| GC Spectra .....                                 | S27 |
| NMR Spectra .....                                | S54 |

**General Experimental.** Analytical thin layer chromatography (TLC) was performed with EM Science silica gel 60 F254 aluminum plates. Visualization was done under a UV lamp (254 nm) and by immersion in ethanolic phosphomolybdic acid (PMA) or potassium permanganate (KMnO<sub>4</sub>), followed by heating using a heat gun. Organic solutions were concentrated by rotary evaporation at 23–40 °C. Purification of reaction products were generally done by flash column chromatography with Grace Materials Technologies 230–400 mesh silica gel.

**Materials.** Halocarbon 125-Pentafluoroethane (Purity: 99.0% min., 9.1kg in 16 L size cylinder) was purchased from SCIENTIFIC GAS ENGINEERING CO., LTD. Fluoroform (Research Grade, Purity: 99.999% min., 9.1kg in 16 L size cylinder) was purchased from SynQuest Laboratories, USA. Copper(I) chloride (extra pure, 99.99%) was purchased from Acros. Potassium tert-butoxide (97%) was purchased from Alfa Aesar. Anhydrous DMF was purchased from J&K Scientific. TREAT-HF was purchased from J&K Scientific and Macklin. Other chemicals for substrates preparation were purchased from Acros, J&K Scientific, Aldrich and Dikemann.

**Instrumentation.** Proton nuclear magnetic resonance spectra (<sup>1</sup>H NMR) spectra, carbon nuclear magnetic resonance spectra (<sup>13</sup>C NMR) and fluorine nuclear magnetic resonance spectra (<sup>19</sup>F NMR) were recorded at 23 °C on a Bruker 400 spectrometer in CDCl<sub>3</sub> (400 MHz for <sup>1</sup>H, 101 MHz for <sup>13</sup>C and 377 MHz for <sup>19</sup>F) and Bruker 500 spectrometer in CDCl<sub>3</sub> (500 MHz for <sup>1</sup>H, 126 MHz for <sup>13</sup>C and 471 MHz for <sup>19</sup>F). Chemical shifts for protons were reported as parts per million in δ scale using solvent residual peak (CHCl<sub>3</sub>: 7.26 ppm) or tetramethylsilane (0.00 ppm) as internal standards. Chemical shifts of <sup>13</sup>C NMR spectra were reported in ppm from the central peak of CDCl<sub>3</sub> (77.16 ppm) on the δ scale. Chemical shifts of <sup>19</sup>F NMR are reported as parts per million in δ scale using benzotrifluoride (-63.72 ppm) as internal standards. Data are represented as follows: chemical shift, integration, multiplicity (s = singlet, d = doublet, t = triplet, q = quartet, qn = quintuplet, sx = sextet, sp = septuplet, m = multiplet, br = broad), and coupling constant (*J*, Hz). High resolution mass spectra (HRMS) were obtained on a Thermo Q Exactive Focus Orbitrap Mass Spectrometer or a Bruker 9.4T ICR Mass Spectrometer.

## Experimental Procedures

### Modified procedure for the preparation of pentafluoroethane-derived $[\text{CuCF}_2\text{CF}_3]$ reagent<sup>1</sup>:

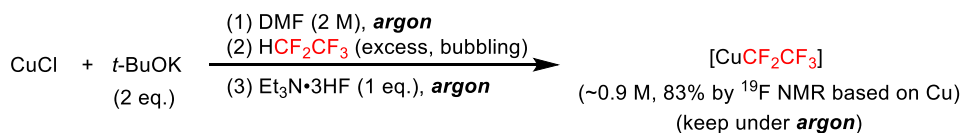

In a glove box, to a test tube was charged CuCl (200 mg, 2.0 mmol), *t*-BuOK (464 mg, 4.0 mmol) and a stirrer bar. The tube was sealed with a septum, brought out of the glove box and put under an argon atmosphere. Degassed DMF (1.0 mL) was added via syringe and the mixture was vigorously stirred at room temperature for 30 min. Then pentafluoroethane ( $\text{HCF}_2\text{CF}_3$ ) was bubbled into the mixture by using a needle connected to the  $\text{HCF}_2\text{CF}_3$  cylinder at room temperature for 5 min. After removing the  $\text{HCF}_2\text{CF}_3$  inlet, the mixture was stirred for 5 min and  $\text{Et}_3\text{N}\cdot 3\text{HF}$  (326  $\mu\text{L}$ , 2.0 mmol) was slowly added under argon and the mixture was stirred for another 5 min. A slightly greyish yellow solution with white precipitates was obtained as the  $[\text{CuCF}_2\text{CF}_3]$  solution in DMF (~83%, ~0.9 M).

$^{19}\text{F}$  NMR of freshly prepared  $\text{CuCF}_2\text{CF}_3$  reagent (in DMF, under argon, internal standard =  $\text{PhCF}_3$ ):

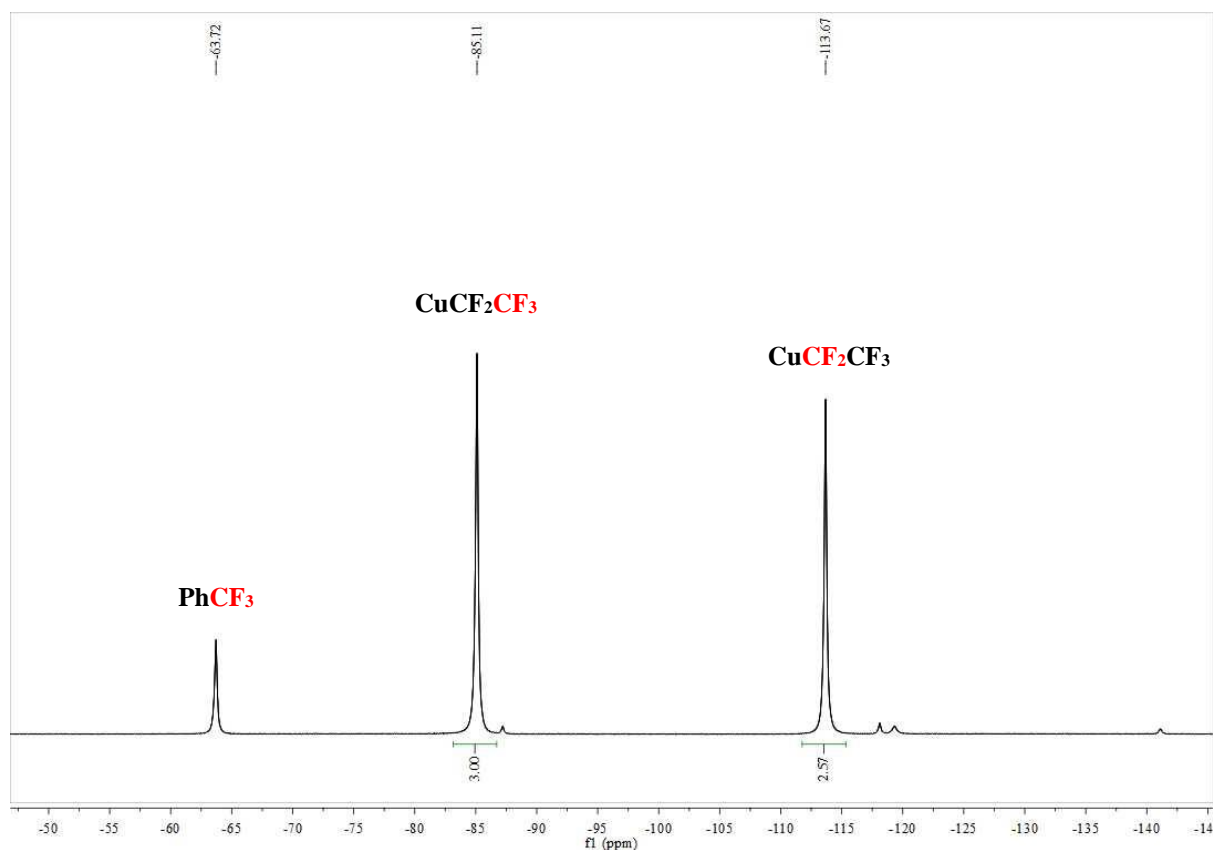

### General procedure for cyclization/*bis*-pentafluoroethylation of 1,6-dienes:

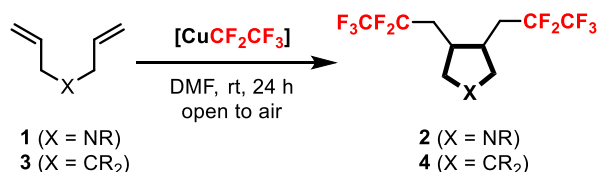

Under air, to a test tube equipped with a magnetic stir bar and diene **1** or **3** (0.2 mmol) was added above freshly prepared  $[\text{CuCF}_2\text{CF}_3]$  (1.0 mL, 0.90 mmol in DMF) at 0°C. Then the tube was warmed to room temperature and stirred for 24 h. The color slowly changed from greyish yellow to pale grey to blue to dark red. The reaction mixture was quenched with aq. sat. EDTA·2Na and extracted with diethyl ether three times. The organic layers were combined, washed with water then brine, dried over anhydrous  $\text{Na}_2\text{SO}_4$ , filtered and concentrated by rotary evaporator. The crude product was purified by flash column chromatography on silica gel to afford the desired product **2** or **4**.

### 1 mmol scale reaction:

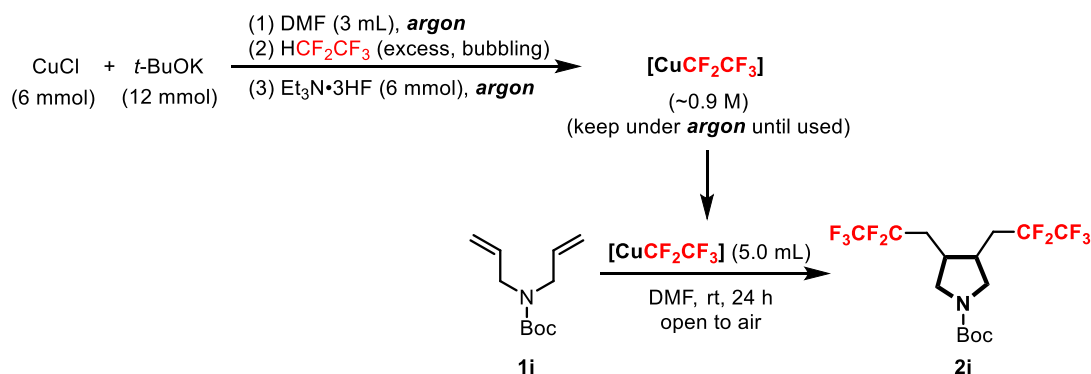

In a glove box, to a 25mL round-bottom flask was charged CuCl (600 mg, 6.0 mmol), *t*-BuOK (1.38 g, 12.0 mmol) and a stirrer bar. The flask was sealed with a septum, brought out of the glove box and put under an argon atmosphere. Degassed DMF (3.0 mL) was added via syringe in ambient water bath and the mixture was vigorously stirred at room temperature for 45 min. Then pentafluoroethane ( $\text{HCF}_2\text{CF}_3$ ) was bubbled into the mixture by using a needle connected to the  $\text{HCF}_2\text{CF}_3$  cylinder at room temperature for 10 min. After removing the  $\text{HCF}_2\text{CF}_3$  inlet, the mixture was stirred for 5 min and  $\text{Et}_3\text{N}\cdot\text{3HF}$  (0.98 mL, 6.0 mmol) was slowly added under argon and the mixture was stirred for another 5 min. A slightly greyish yellow solution with white precipitates was obtained as the  $[\text{CuCF}_2\text{CF}_3]$  solution in DMF (~0.9 M).

Under air, to a 25mL round-bottom flask equipped with a magnetic stir bar and **1i** (197.3 mg, 1.0 mmol) was added above freshly prepared  $[\text{CuCF}_2\text{CF}_3]$  (5.0 mL, 4.5 mmol in DMF) at 0°C. Then the flask was warmed to room temperature and stirred for 36 h. The color slowly changed from greyish yellow to pale grey to blue to dark red. The reaction mixture was quenched with aq. sat. EDTA·2Na and extracted with diethyl ether three times. The

organic layers were combined, washed with water then brine, dried over anhydrous Na<sub>2</sub>SO<sub>4</sub>, filtered and concentrated by rotary evaporator. The crude product was purified by flash column chromatography on silica gel to afford the desired product **2i** as a yellowish liquid (240.3 mg, 0.55 mmol, 55%, dr = 1.9:1 by GC-MS). R<sub>f</sub> = 0.31 (hexane:EA = 10:1).

#### Derivatization of **2i**:

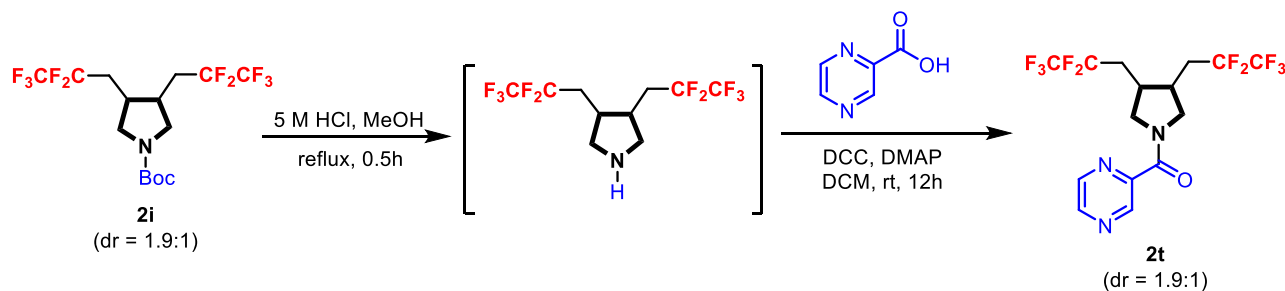

To a 10mL round-bottom flask equipped with a magnetic stir bar and **2i** (43.5mg, 0.1 mmol, dr = 1.9:1 by GC-MS) was added MeOH (2 mL) and 5M HCl (2 mL) at room temperature. Then the flask was heated to reflux (~80 °C) and stirred for 0.5 h. Upon the starting material was detected to be fully converted by TLC, the reaction mixture was quenched with aq. sat. NaOH until pH = 11 and extracted with DCM three times. The organic layers were combined, washed with brine, dried over anhydrous Na<sub>2</sub>SO<sub>4</sub>, filtered and concentrated by rotary evaporator. The crude product was directly used for the next step without further purification.

To a 10mL round-bottom flask equipped with a magnetic stir bar and the crude product above was added 2-pyrazinecarboxylic acid (18.6 mg, 0.15 mmol) and 4-(dimethylamino)pyridine (DMAP, 1.2 mg, 0.01 mmol). Then the solution of *N,N'*-dicyclohexylcarbodiimide (DCC, 41.3 mg, 0.2 mmol) in DCM (2 mL) was added to the mixture at room temperature. After being stirred for 12h, the reaction was diluted with DCM, washed with water three times then brine, dried over anhydrous Na<sub>2</sub>SO<sub>4</sub>, filtered and concentrated by rotary evaporator. The crude product was purified by flash column chromatography on silica gel to afford the desired product **2t** as a white solid (35.1 mg, 0.08 mmol, 80%, dr = 1.9:1 by GC-MS). R<sub>f</sub> = 0.48 (hexane:EA = 1:1). **Major diastereomer:** <sup>1</sup>H NMR (500 MHz, CDCl<sub>3</sub>): δ 9.20 (s, 1H), 8.60 (d, *J* = 60.2 Hz, 2H), 4.06 (dd, *J* = 12.0, 5.8 Hz, 1H), 3.97 – 3.86 (m, 2H), 3.69 (dd, *J* = 12.9, 5.3 Hz, 1H), 2.81 (s, 2H), 2.40 – 1.95 (m, 4H) ppm. <sup>13</sup>C NMR (126 MHz, CDCl<sub>3</sub>): δ 164.4, 148.1, 146.3 (d, *J* = 36.4 Hz), 142.4, 118.9 (qtd, *J*<sub>C-F</sub> = 285.5, 35.7, 8.4 Hz), 115.5 (qt, *J*<sub>C-F</sub> = 253.4, 38.1 Hz), 52.1 (dd, *J* = 205.8, 3.1 Hz), 34.0 (d, *J* = 338.6 Hz), 28.6 (dt, *J* = 49.1, 21.6 Hz) ppm. <sup>19</sup>F NMR (471 MHz, CDCl<sub>3</sub>): δ -86.74 (d, *J* = 34.2 Hz, 6F), -116.55 – -119.62 (m, 4F) ppm. **Minor diastereomer:** <sup>1</sup>H NMR (500 MHz, CDCl<sub>3</sub>): δ 9.17 (s, 1H), 8.60 (d, *J* = 60.2 Hz, 2H), 4.25 (ddd, *J* = 18.0, 12.2, 4.6 Hz, 2H), 3.72 – 3.64 (m, 1H), 3.43 (dd, *J* = 12.8, 8.8 Hz, 1H), 2.40 – 1.95 (m, 6H) ppm. <sup>13</sup>C NMR (126 MHz, CDCl<sub>3</sub>): δ 163.9, 148.3, 146.2 (d, *J* = 36.2 Hz), 142.4, 52.9 (dd, *J* = 213.2, 4.2 Hz), 36.8 (d, *J* = 334.3 Hz), 32.4 (dt, *J* = 40.6, 22.1 Hz) ppm (CF<sub>2</sub>CF<sub>3</sub> peaks cannot be identified in detail). <sup>19</sup>F NMR (471 MHz, CDCl<sub>3</sub>): δ -86.66 (d, *J* = 18.3 Hz, 6F), -116.55 – -119.62 (m, 4F) ppm. **HRMS** m/z (ESI): calcd. for C<sub>15</sub>H<sub>13</sub>F<sub>10</sub>N<sub>3</sub>ONa [M+Na]<sup>+</sup> : 464.0779; found: 464.0779.



## Substrate table

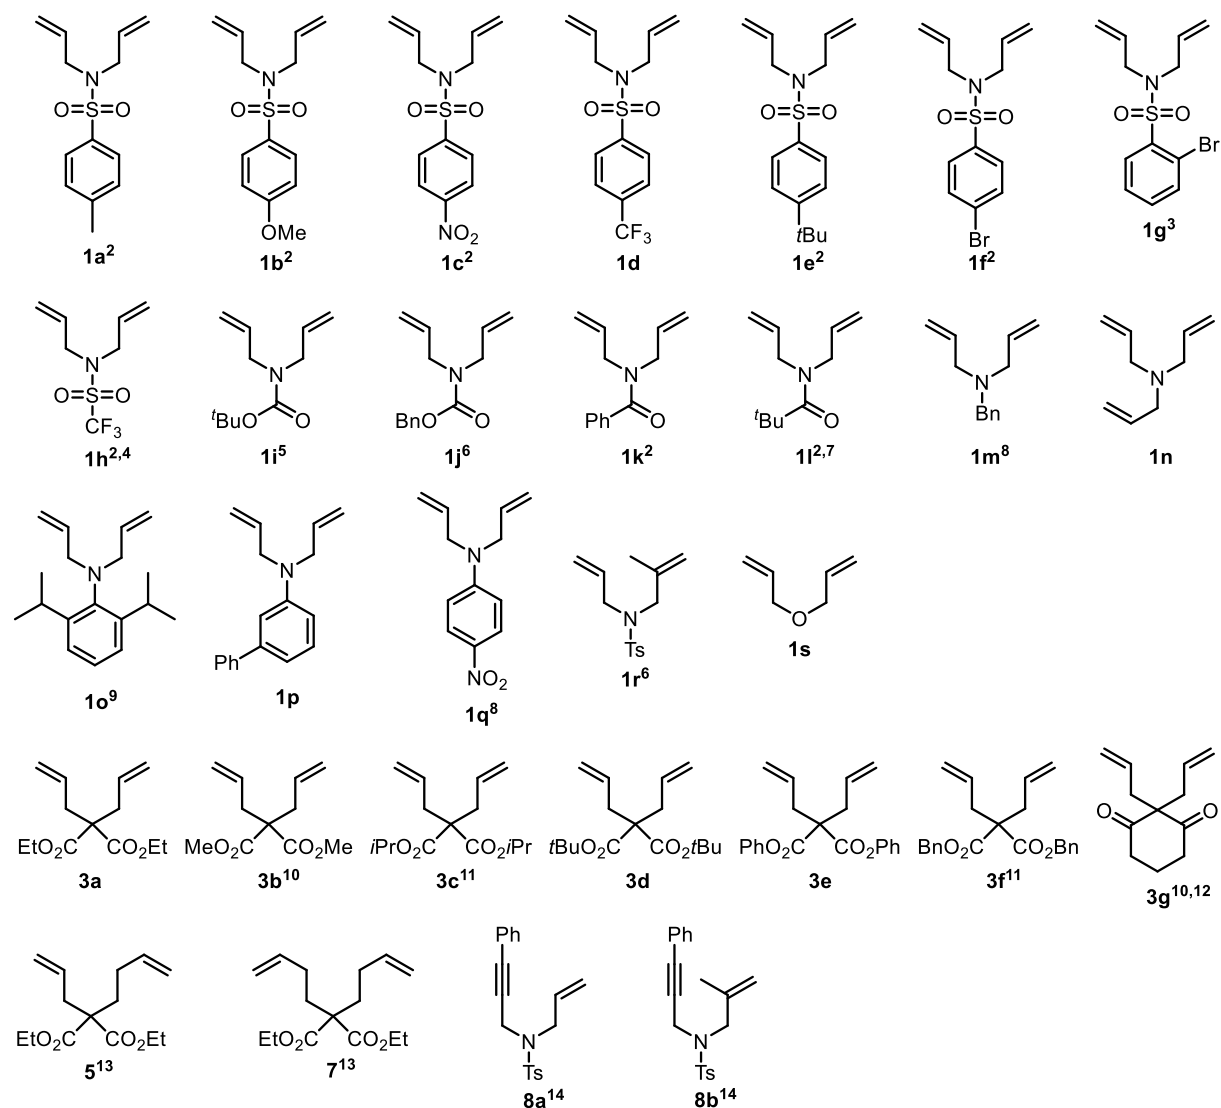

Amine derived 1,6-diene or enyne **1a-1c**, **1e-1m**, **1o**, **1q-1r**, **8a-8b**, malonate or dione derivative **3b-3c**, **3f-3g**, **5**, **7** were synthesized according to literature procedure, and the spectral data were in full accordance with the literature report.<sup>2-14</sup> **1n**, **1s** and **3a** were commercially available.

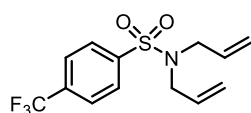

**1d: N,N-diallyl-4-(trifluoromethyl)benzenesulfonamide.** Prepared according to reported method.<sup>2</sup> Triethylamine (0.32 mL, 2.3 mmol) was added dropwise to a stirred solution of diallylamine (204.0 mg, 2.1 mmol) in DCM (10 mL) at 0 °C. Then 4-(trifluoromethyl)benzene sulfonyl chloride (489.2 mg, 2.0 mmol) was slowly added to the mixture. The reaction was allowed to warm up to room temperature and stirred overnight. Upon reaction completed, the reaction mixture was diluted with DCM, washed with water three times then brine, dried

over anhydrous Na<sub>2</sub>SO<sub>4</sub>, filtered and concentrated by rotary evaporator. The crude product was purified by flash column chromatography on silica gel to afford **1d** as a white solid (2.0 mmol, 601.4 mg, 98 %), *R*<sub>f</sub> = 0.36 (hexane:EA = 10:1). <sup>1</sup>H NMR (500 MHz, CDCl<sub>3</sub>): δ 7.95 (d, *J* = 8.1 Hz, 2H), 7.76 (d, *J* = 8.1 Hz, 2H), 5.59 (tt, *J* = 16.7, 6.4 Hz, 2H), 5.21 – 5.09 (m, 4H), 3.84 (d, *J* = 6.3 Hz, 4H) ppm. <sup>13</sup>C NMR (126 MHz, CDCl<sub>3</sub>): δ 144.2, 134.2 (q, *J*<sub>C-F</sub> = 32.9 Hz), 132.1, 127.7, 126.3 (q, *J*<sub>C-F</sub> = 3.6 Hz), 123.4 (q, *J*<sub>C-F</sub> = 272.8 Hz), 119.6, 49.5 ppm. HRMS *m/z* (ESI): calcd. for C<sub>13</sub>H<sub>14</sub>F<sub>3</sub>NO<sub>2</sub>SNa [M+Na]<sup>+</sup> : 328.0590; found: 328.0583.

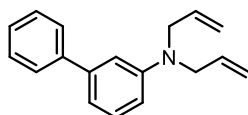

**1p: N,N-diallyl-[1,1'-biphenyl]-3-amine.** Prepared according to reported method.<sup>8</sup> To a round-bottom flask containing dry DMF (10 mL) and NaH (60% in mineral oil, 240.0 mg, 6.0 mmol) was added 3-phenyl aniline (507.6 mg 3.0 mmol) at 0 °C under argon. The reaction mixture was stirred for 30 minutes at room temperature. Then, allyl bromide (798.5 mg, 6.6 mmol) was added to the mixture dropwise at 0 °C. The reaction was allowed to warm up to room temperature and stirred overnight. Upon reaction completed, the reaction mixture was quenched with aq. sat. NaHCO<sub>3</sub> and extracted with diethyl ether three times. The organic layers were combined, washed with water then brine, dried over anhydrous Na<sub>2</sub>SO<sub>4</sub>, filtered and concentrated by rotary evaporator. The crude product was purified by flash column chromatography on silica gel to afford **1p** as a yellowish oil (1.0 mmol, 249.6 mg, 33 %), *R*<sub>f</sub> = 0.68 (hexane:EA = 10:1). <sup>1</sup>H NMR (400 MHz, CDCl<sub>3</sub>): δ 7.65 – 7.57 (m, 2H), 7.45 (t, *J* = 7.5 Hz, 2H), 7.36 (t, *J* = 7.3 Hz, 1H), 7.30 (t, *J* = 8.1 Hz, 1H), 6.95 (d, *J* = 7.0 Hz, 2H), 6.78 – 6.69 (m, 1H), 5.93 (ddt, *J* = 17.0, 10.0, 4.8 Hz, 2H), 5.29 – 5.16 (m, 4H), 4.01 (dd, *J* = 2.8, 2.0 Hz, 4H) ppm. <sup>13</sup>C NMR (101 MHz, CDCl<sub>3</sub>): δ 149.1, 142.3, 134.1, 129.5, 128.7, 127.4, 127.2, 116.2, 115.6, 111.5 (d, *J* = 5.6 Hz), 53.0 ppm. HRMS *m/z* (APCI): calcd. for C<sub>18</sub>H<sub>20</sub>N [M+H]<sup>+</sup> : 250.1590; found: 250.1587.

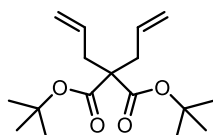

**3d: Di-tert-butyl diallylmalonate.** Prepared according to reported method.<sup>13</sup> To the solution of diisopropyl malonate (432.6 mg, 2.0 mmol) in dry THF (4 mL) and was added NaH (60% in mineral oil, 320.0 mg, 8.0 mmol) portionwise at 0 °C under argon. The reaction mixture was stirred for 30 minutes at room temperature. Then, allyl bromide (604.9 mg, 5.0 mmol) was added to the mixture dropwise. The reaction was heated to 60 °C and stirred overnight. Upon reaction completed, the reaction mixture was quenched with aq. sat. NH<sub>4</sub>Cl and extracted with diethyl ether three times. The organic layers were combined, washed with water then brine, dried over anhydrous Na<sub>2</sub>SO<sub>4</sub>, filtered and concentrated by rotary evaporator. The crude product was purified by flash column chromatography on silica gel to afford **3d** as a white solid (1.9 mmol, 575.6 mg, 97 %), *R*<sub>f</sub> = 0.47 (hexane:EA = 10:1). <sup>1</sup>H NMR (500 MHz, CDCl<sub>3</sub>): δ 5.70 – 5.60 (m, 2H), 5.10 (dd, *J* = 13.6, 6.8 Hz, 4H), 2.55 (d, *J* = 7.4 Hz, 4H), 1.44 (s, 18H) ppm. <sup>13</sup>C NMR (126 MHz, CDCl<sub>3</sub>): δ 170.2, 132.8, 119.0, 81.4, 57.7, 36.6, 28.1 ppm. HRMS *m/z* (ESI): calcd. for C<sub>17</sub>H<sub>28</sub>O<sub>4</sub>Na [M+Na]<sup>+</sup> : 319.1880; found: 319.1870.

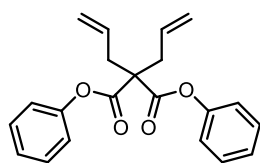

**3e: Diphenyl diallylmalonate.** Prepared according to reported method.<sup>13</sup> To the solution of diphenyl malonate (512.5 mg, 2.0 mmol) in dry THF (4 mL) and was added NaH (60% in mineral oil, 320.0 mg, 8.0 mmol) portionwise at 0 °C under argon. The reaction mixture was stirred for 30 minutes at room temperature. Then, allyl bromide (604.9 mg, 5.0 mmol) was added to the mixture dropwise. The reaction was heated to 60 °C and stirred overnight. Upon reaction completed, the reaction mixture was quenched with aq. sat. NH<sub>4</sub>Cl and extracted with diethyl ether three times. The organic layers were combined, washed with water then brine, dried over anhydrous Na<sub>2</sub>SO<sub>4</sub>, filtered and concentrated by rotary evaporator. The crude product was purified by flash column chromatography on silica gel to afford **3e** as a yellowish oil (1.1 mmol, 368.0 mg, 55 %), *R*<sub>f</sub> = 0.34 (hexane:EA = 10:1). **<sup>1</sup>H NMR** (500 MHz, CDCl<sub>3</sub>): δ 7.44 (t, *J* = 7.9 Hz, 4H), 7.30 (t, *J* = 7.4 Hz, 2H), 7.17 (d, *J* = 7.7 Hz, 4H), 5.96 (dq, *J* = 10.0, 7.5 Hz, 2H), 5.35 (dd, *J* = 26.1, 13.5 Hz, 4H), 2.99 (d, *J* = 7.5 Hz, 4H) ppm. **<sup>13</sup>C NMR** (126 MHz, CDCl<sub>3</sub>): δ 169.1, 150.6, 131.8, 129.6, 126.3, 121.4, 120.2, 57.6, 37.2 ppm. **HRMS** *m/z* (ESI): calcd. for C<sub>21</sub>H<sub>20</sub>O<sub>4</sub>Na [M+Na]<sup>+</sup> : 359.1254; found: 359.1244.

## Control Experiment

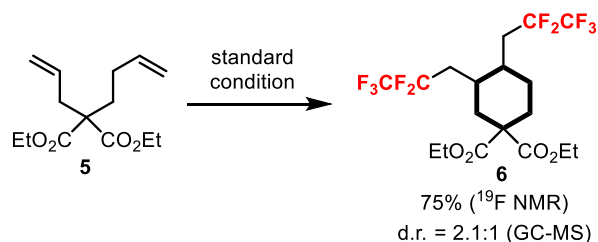

Under air, to a test tube equipped with a magnetic stir bar and 1,7-diene **5** (50.9 mg, 0.2 mmol) was added freshly prepared  $[\text{CuCF}_2\text{CF}_3]$  (1.0 mL, 0.90 mmol in DMF) at  $0^\circ\text{C}$ . Then the tube was warmed to room temperature and stirred for 24 h. After the reaction mixture was diluted by DCM, the crude yields of products were analyzed by  $^{19}\text{F}$  NMR (75 %) using  $\text{PhCF}_3$  as the internal standard and GC-MS (dr = 2.1:1). The reaction mixture was quenched with aq. sat. EDTA·2Na and extracted with diethyl ether three times. The organic layers were combined, washed with water then brine, dried over anhydrous  $\text{Na}_2\text{SO}_4$ , filtered and concentrated by rotary evaporator. The crude product was purified by flash column chromatography on silica gel to afford a mixture of **6** and mono-pentafluoroethylated by-products as a yellowish liquid,  $R_f$  = 0.35 (hexane:EA = 10:1). **Compound 6: Major diastereomer:**  $^{19}\text{F}$  NMR (471 MHz,  $\text{CDCl}_3$ ):  $\delta$  -87.00 (dd,  $J$  = 38.0, 4.8 Hz, 6F), -116.75 – -119.43 (m, 4F) ppm. **Minor diastereomer:**  $^{19}\text{F}$  NMR (471 MHz,  $\text{CDCl}_3$ ):  $\delta$  -87.00 (dd,  $J$  = 91.4, 4.9 Hz, 6F), -116.75 – -119.43 (m, 4F) ppm. **HRMS**  $m/z$  (ESI): calcd. for  $\text{C}_{18}\text{H}_{22}\text{F}_{10}\text{O}_4\text{Na}$   $[\text{M}+\text{Na}]^+$  : 515.1251; found: 515.1241.

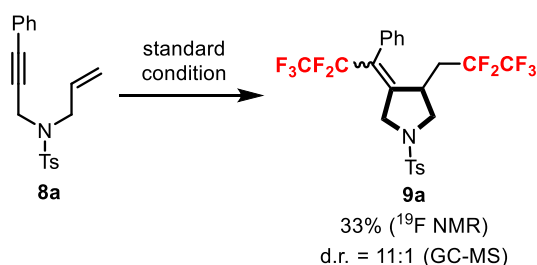

Under air, to a test tube equipped with a magnetic stir bar and enyne **8a** (65.1 mg, 0.2 mmol) was added freshly prepared  $[\text{CuCF}_2\text{CF}_3]$  (1.0 mL, 0.90 mmol in DMF) at  $0^\circ\text{C}$ . Then the tube was warmed to room temperature and stirred for 24 h. After the reaction mixture was diluted by DCM, the crude yields of products were analyzed by  $^{19}\text{F}$  NMR (33 %) using  $\text{PhCF}_3$  as the internal standard and GC-MS (dr = 11:1). The reaction mixture was quenched with aq. sat. EDTA·2Na and extracted with diethyl ether three times. The organic layers were combined, washed with water then brine, dried over anhydrous  $\text{Na}_2\text{SO}_4$ , filtered and concentrated by rotary evaporator. The crude product was purified by flash column chromatography on silica gel to afford the desired product **9a** (with some impurity) as a yellowish liquid (34.7 mg, ~0.06 mmol, ~31 %, dr > 20:1 by GC-MS),  $R_f$  = 0.20 (hexane:EA = 10:1). **Major diastereomer (with impurity):**  $^1\text{H}$  NMR (500 MHz,  $\text{CDCl}_3$ ):  $\delta$  7.59 (d,  $J$  = 8.1 Hz, 2H), 7.44 –

7.38 (m, 3H), 7.34 (d,  $J = 8.0$  Hz, 2H), 7.04 (br, 2H), 3.75 (dd,  $J = 22.8, 13.4$  Hz, 2H), 3.65 – 3.57 (m, 1H), 3.30 (dt,  $J = 16.7, 3.2$  Hz, 1H), 3.03 (dd,  $J = 10.2, 5.3$  Hz, 1H), 2.45 (s, 3H), 2.42 – 2.10 (m, 2H) ppm.  $^{13}\text{C}$  NMR (126 MHz,  $\text{CDCl}_3$ ):  $\delta$  150.7, 144.6, 133.0 (t,  $J_{\text{C-F}} = 3.0$  Hz), 132.0, 130.1, 129.4, 129.2, 128.9, 127.9, 125.6 (t,  $J_{\text{C-F}} = 22.1$  Hz), 53.0, 51.7, 35.4, 34.2 (t,  $J_{\text{C-F}} = 21.9$  Hz), 21.7 ppm ( $\text{CF}_2\text{CF}_3$  peaks cannot be identified in detail).  $^{19}\text{F}$  NMR (471 MHz,  $\text{CDCl}_3$ ):  $\delta$  -83.46 (s, 3F), -87.12 (s, 3F), -111.65 (d,  $J = 25.9$  Hz, 2F), -118.95 (dddd,  $J = 266.1, 33.9, 28.7, 6.6$  Hz, 2F) ppm. HRMS  $m/z$  (ESI): calcd. for  $\text{C}_{23}\text{H}_{19}\text{F}_{10}\text{NO}_2\text{SNa}$   $[\text{M}+\text{Na}]^+$  : 586.0869; found: 586.0860.

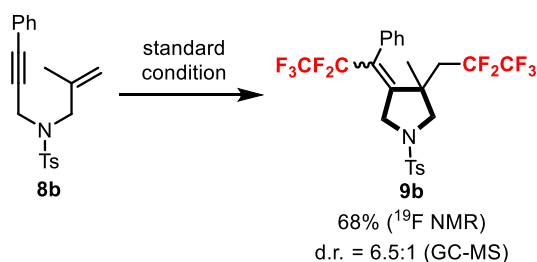

Under air, to a test tube equipped with a magnetic stir bar and enyne **8b** (67.9 mg, 0.2 mmol) was added freshly prepared  $[\text{CuCF}_2\text{CF}_3]$  (1.0 mL, 0.90 mmol in DMF) at  $0^\circ\text{C}$ . Then the tube was warmed to room temperature and stirred for 24 h. After the reaction mixture was diluted by DCM, the crude yields of products were analyzed by  $^{19}\text{F}$  NMR (68 %) using  $\text{PhCF}_3$  as the internal standard and GC-MS (dr = 6.5:1). The reaction mixture was quenched with aq. sat. EDTA·2Na and extracted with diethyl ether three times. The organic layers were combined, washed with water then brine, dried over anhydrous  $\text{Na}_2\text{SO}_4$ , filtered and concentrated by rotary evaporator. The crude product was purified by flash column chromatography on silica gel to afford the desired product **9b** (with some impurity) as a yellowish liquid (64.3 mg, ~0.11 mmol, ~56 %, dr > 20:1 by GC-MS),  $R_f = 0.28$  (hexane:EA = 10:1). **Major diastereomer (with impurity):**  $^1\text{H}$  NMR (500 MHz,  $\text{CDCl}_3$ ):  $\delta$  7.72 (d,  $J = 8.0$  Hz, 2H), 7.39 (d,  $J = 7.7$  Hz, 5H), 7.12 (dd,  $J = 25.3, 7.3$  Hz, 2H), 4.12 (ddt,  $J = 130.0, 16.2, 3.7$  Hz, 2H), 3.12 (dd,  $J = 34.0, 9.6$  Hz, 2H), 2.46 (s, 3H), 1.93 (ddd,  $J = 35.1, 15.5, 4.6$  Hz, 1H), 1.61 (ddd,  $J = 34.3, 15.5, 6.8$  Hz, 1H), 1.17 (s, 3H) ppm.  $^{13}\text{C}$  NMR (126 MHz,  $\text{CDCl}_3$ ):  $\delta$  144.5, 131.6, 131.10 (t,  $J_{\text{C-F}} = 3.2$  Hz), 130.97, 130.0, 129.5, 128.3, 128.2, 128.1, 125.1 (t,  $J_{\text{C-F}} = 22.9$  Hz), 119.4 (qt,  $J_{\text{C-F}} = 287.1, 38.9$  Hz), 118.5 (qt,  $J_{\text{C-F}} = 286.1, 35.7$  Hz), 115.7 (qt,  $J_{\text{C-F}} = 256.3, 37.1$  Hz), 113.3 (tq,  $J = 256.5, 38.4$  Hz), 58.4 (d,  $J = 5.8$  Hz), 51.4 (t,  $J_{\text{C-F}} = 9.1$  Hz), 45.8, 36.3 (t,  $J_{\text{C-F}} = 19.3$  Hz), 25.5 (d,  $J = 3.5$  Hz), 21.7 ppm.  $^{19}\text{F}$  NMR (471 MHz,  $\text{CDCl}_3$ ):  $\delta$  -82.86 (s, 3F), -87.86 (s, 3F), -111.38 (q,  $J = 267.9$  Hz, 2F), -115.89 – -118.39 (m, 2F) ppm. HRMS  $m/z$  (ESI): calcd. for  $\text{C}_{24}\text{H}_{21}\text{F}_{10}\text{NO}_2\text{SNa}$   $[\text{M}+\text{Na}]^+$  : 600.1026; found: 600.1012.

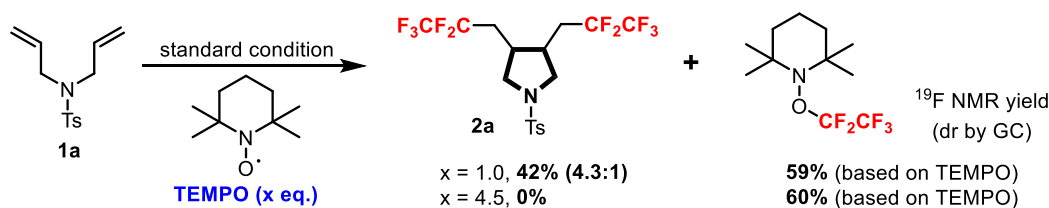

Under air, to a test tube equipped with a magnetic stir bar was added diene **1a** (25.1 mg, 0.1 mmol), TEMPO (1.0 eq.: 15.6 mg; 4.5 eq.: 70.3 mg) and then freshly prepared  $[\text{CuCF}_2\text{CF}_3]$  (0.5 mL, 0.45 mmol in DMF) at 0°C. Then the tube was warmed to room temperature and stirred for 24 h. After the reaction mixture was diluted by DCM, the crude yields and dr ratio of **2a** and TEMPO- $\text{CF}_2\text{CF}_3$  were analyzed by <sup>19</sup>F NMR using  $\text{PhCF}_3$  as the internal standard and GC-MS. TEMPO- $\text{CF}_2\text{CF}_3$ : <sup>19</sup>F NMR (471 MHz,  $\text{CDCl}_3$ ):  $\delta$  -84.90 (s, 2F), -85.87 (s, 3F) ppm. The spectral data are in full accordance with the literature report.<sup>15</sup>

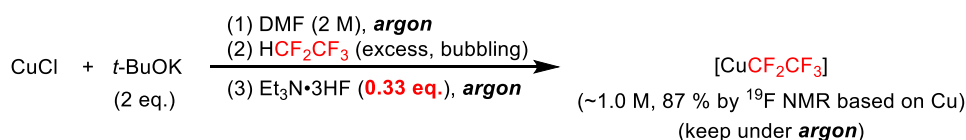

In a glove box, to a test tube was charged CuCl (200 mg, 2.0 mmol), *t*-BuOK (464 mg, 4.0 mmol) and a stirrer bar. The tube was sealed with a septum, brought out of the glove box and put under an argon atmosphere. Degassed DMF (1.0 mL) was added via syringe and the mixture was vigorously stirred at room temperature for 30 min. Then pentafluoroethane ( $\text{HCF}_2\text{CF}_3$ ) was bubbled into the mixture by using a needle connected to the  $\text{HCF}_2\text{CF}_3$  cylinder at room temperature for 5 min. After removing the  $\text{HCF}_2\text{CF}_3$  inlet, the mixture was stirred for 5 min and  $\text{Et}_3\text{N}\cdot 3\text{HF}$  (107  $\mu\text{L}$ , 0.67 mmol) was slowly added under argon and the mixture was stirred for another 5 min. A slightly greyish yellow solution with white precipitates was obtained as the  $[\text{CuCF}_2\text{CF}_3]$  solution in DMF (~87%, ~1.0 M).

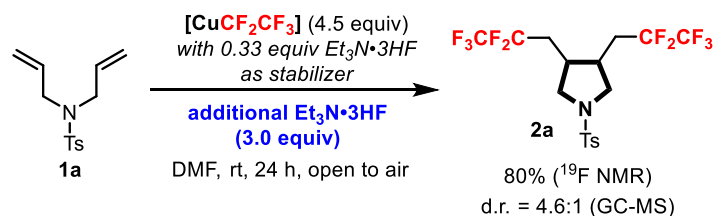

Under air, to a test tube equipped with a magnetic stir bar was added diene **1a** (25.1 mg, 0.1 mmol),  $\text{Et}_3\text{N}\cdot 3\text{HF}$  (48.9  $\mu\text{L}$ , 0.3 mmol) and then above freshly prepared  $[\text{CuCF}_2\text{CF}_3]$  (0.45 mL, 0.45 mmol in DMF) at 0°C. Then the tube was warmed to room temperature and stirred for 24 h. After the reaction mixture was diluted by DCM, the crude yield and dr ratio of **2a** was analyzed by <sup>19</sup>F NMR (80 %) using  $\text{PhCF}_3$  as the internal standard and GC-

MS (dr = 4.6:1).

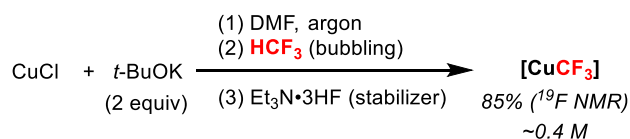

According to literature procedure,<sup>16</sup> in a glove box, to a test tube was charged CuCl (100 mg, 1.0 mmol), *t*-BuOK (232 mg, 2.0 mmol) and a stirrer bar. The tube was sealed with a septum, brought out of the glove box and put under an argon atmosphere. Degassed DMF (2.0 mL) was added via syringe and the mixture was vigorously stirred at room temperature for 30 min. Then fluoroform (HCF<sub>3</sub>) was bubbled into the mixture by using a needle connected to the HCF<sub>3</sub> cylinder at room temperature for 5 min. After removing the HCF<sub>3</sub> inlet, the mixture was stirred for 5 min and Et<sub>3</sub>N·3HF (124 μL, 0.76 mmol) was slowly added under argon and the mixture was stirred for another 5 min. A slightly brown solution with white precipitates was obtained as the [CuCF<sub>3</sub>] solution in DMF (~0.4 M).

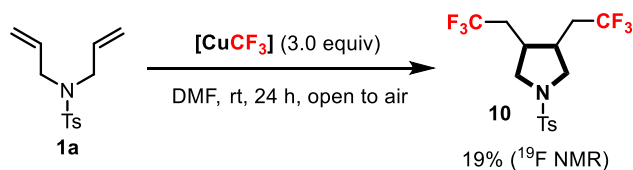

Under air, to a test tube equipped with a magnetic stir bar and diene **1a** (25.1 mg, 0.1 mmol) was added above freshly prepared [CuCF<sub>3</sub>] (0.75 mL, 0.3 mmol in DMF) at 0°C. Then the tube was warmed to room temperature and stirred for 24 h. After the reaction mixture was diluted by DCM, the crude yield of **10** was analyzed by <sup>19</sup>F NMR (19 %) using PhCF<sub>3</sub> as the internal standard and GC-MS. <sup>19</sup>F NMR (471 MHz, CDCl<sub>3</sub>): δ -65.67 (t, *J* = 11.1 Hz, major diastereomer), -66.04 (t, *J* = 11.5 Hz, minor diastereomer) ppm. The spectral data are in full accordance with the literature report.<sup>17</sup>

## X-ray Structure of **2c** and **4g**

Crystals of **2c** were obtained by slow diffusion from the solution in CHCl<sub>3</sub> layered *n*-hexane. The crystal was kept at 296 K during data collection. Crystallographic data for **2c** has been deposited with the Cambridge Crystallographic Data Centre (CCDC) under deposition number 2151010.

|                                   |                                                                                 |                  |
|-----------------------------------|---------------------------------------------------------------------------------|------------------|
| Identification code               | CCDC 2151010                                                                    |                  |
| Empirical formula                 | C <sub>16</sub> H <sub>14</sub> F <sub>10</sub> N <sub>2</sub> O <sub>4</sub> S |                  |
| Formula weight                    | 520.35                                                                          |                  |
| Temperature                       | 297(2) K                                                                        |                  |
| Wavelength                        | 0.71073 Å                                                                       |                  |
| Crystal system                    | Monoclinic                                                                      |                  |
| Space group                       | P2 <sub>1</sub> /n                                                              |                  |
| Unit cell dimensions              | a = 8.4047(8) Å                                                                 | α = 90°.         |
|                                   | b = 21.134(2) Å                                                                 | β = 101.665(3)°. |
|                                   | c = 11.6700(11) Å                                                               | γ = 90°.         |
| Volume                            | 2030.1(3) Å <sup>3</sup>                                                        |                  |
| Z                                 | 4                                                                               |                  |
| Density (calculated)              | 1.702 Mg/m <sup>3</sup>                                                         |                  |
| Absorption coefficient            | 0.278 mm <sup>-1</sup>                                                          |                  |
| F(000)                            | 1048                                                                            |                  |
| Crystal size                      | 0.500 x 0.400 x 0.300 mm <sup>3</sup>                                           |                  |
| Theta range for data collection   | 1.927 to 25.249°.                                                               |                  |
| Index ranges                      | -10 ≤ h ≤ 10, -25 ≤ k ≤ 25, -14 ≤ l ≤ 14                                        |                  |
| Reflections collected             | 28311                                                                           |                  |
| Independent reflections           | 3620 [R(int) = 0.0272]                                                          |                  |
| Completeness to theta = 25.242°   | 98.6 %                                                                          |                  |
| Absorption correction             | multi-scan                                                                      |                  |
| Max. and min. transmission        | 0.7456 and 0.6600                                                               |                  |
| Refinement method                 | Full-matrix least-squares on F <sup>2</sup>                                     |                  |
| Data / restraints / parameters    | 3620 / 17 / 382                                                                 |                  |
| Goodness-of-fit on F <sup>2</sup> | 1.049                                                                           |                  |
| Final R indices [I > 2σ(I)]       | R1 = 0.0786, wR2 = 0.2206                                                       |                  |
| R indices (all data)              | R1 = 0.0912, wR2 = 0.2399                                                       |                  |
| Extinction coefficient            | n/a                                                                             |                  |
| Largest diff. peak and hole       | 0.376 and -0.400 e.Å <sup>-3</sup>                                              |                  |



Crystals of **4g** were obtained by slow diffusion from the solution in CHCl<sub>3</sub> layered *n*-hexane. The crystal was kept at 296 K during data collection. Crystallographic data for **4g** has been deposited with the Cambridge Crystallographic Data Centre (CCDC) under deposition number 2151006.

|                                   |                                                                |                 |
|-----------------------------------|----------------------------------------------------------------|-----------------|
| Identification code               | CCDC 2151006                                                   |                 |
| Empirical formula                 | C <sub>16</sub> H <sub>16</sub> F <sub>10</sub> O <sub>2</sub> |                 |
| Formula weight                    | 430.29                                                         |                 |
| Temperature                       | 296(2) K                                                       |                 |
| Wavelength                        | 1.54178 Å                                                      |                 |
| Crystal system                    | Monoclinic                                                     |                 |
| Space group                       | P2 <sub>1</sub> /n                                             |                 |
| Unit cell dimensions              | a = 9.9751(6) Å                                                | α = 90°.        |
|                                   | b = 12.4668(7) Å                                               | β = 99.824(3)°. |
|                                   | c = 28.5860(18) Å                                              | γ = 90°.        |
| Volume                            | 3502.8(4) Å <sup>3</sup>                                       |                 |
| Z                                 | 8                                                              |                 |
| Density (calculated)              | 1.632 Mg/m <sup>3</sup>                                        |                 |
| Absorption coefficient            | 1.607 mm <sup>-1</sup>                                         |                 |
| F(000)                            | 1744                                                           |                 |
| Crystal size                      | 0.400 x 0.300 x 0.200 mm <sup>3</sup>                          |                 |
| Theta range for data collection   | 3.877 to 68.466°.                                              |                 |
| Index ranges                      | -11 ≤ h ≤ 12, -14 ≤ k ≤ 15, -34 ≤ l ≤ 34                       |                 |
| Reflections collected             | 52073                                                          |                 |
| Independent reflections           | 6392 [R(int) = 0.0477]                                         |                 |
| Completeness to theta = 67.679°   | 99.3 %                                                         |                 |
| Absorption correction             | multi-scan                                                     |                 |
| Max. and min. transmission        | 0.7531 and 0.5592                                              |                 |
| Refinement method                 | Full-matrix least-squares on F <sup>2</sup>                    |                 |
| Data / restraints / parameters    | 6392 / 114 / 608                                               |                 |
| Goodness-of-fit on F <sup>2</sup> | 1.076                                                          |                 |
| Final R indices [I > 2σ(I)]       | R1 = 0.0887, wR2 = 0.2552                                      |                 |
| R indices (all data)              | R1 = 0.0939, wR2 = 0.2642                                      |                 |
| Extinction coefficient            | n/a                                                            |                 |
| Largest diff. peak and hole       | 0.801 and -0.630 e.Å <sup>-3</sup>                             |                 |

## Characterization Data of Products

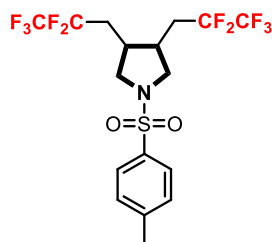

**2a: 3,4-bis(2,2,3,3,3-pentafluoropropyl)-1-tosylpyrrolidine.** Prepared according to the general procedure. Reaction was run using **1a** (50.3 mg, 0.2 mmol) and  $[\text{CuCF}_2\text{CF}_3]$  (1.0 mL, 0.90 mmol in DMF). The product was purified by flash column chromatography on silica gel (hexane/EA) and obtained as a white solid (0.12 mmol, 58.4 mg, 60 %, dr = 4.3:1 by GC-MS),  $R_f$  = 0.19 (hexane:EA = 10:1). **Major diastereomer:**  $^1\text{H NMR}$  (500 MHz,  $\text{CDCl}_3$ ):  $\delta$  7.71 (d,  $J$  = 8.2 Hz, 2H), 7.35 (d,  $J$  = 8.1 Hz, 2H), 3.46 (dd,  $J$  = 10.4, 6.0 Hz, 2H), 3.22 (dd,  $J$  = 10.5, 5.4 Hz, 2H), 2.61 – 2.54 (m, 2H), 2.43 (s, 3H), 1.96 – 1.68 (m, 4H) ppm.  $^{13}\text{C NMR}$  (126 MHz,  $\text{CDCl}_3$ ):  $\delta$  144.3, 133.5, 130.1, 127.4, 118.8 (qt,  $J_{\text{C-F}}$  = 285.3, 36.0 Hz), 115.3 (tq,  $J_{\text{C-F}}$  = 253.6, 38.1 Hz), 51.5 (d,  $J$  = 3.3 Hz), 34.5, 28.4 (t,  $J_{\text{C-F}}$  = 21.7 Hz), 21.6 ppm.  $^{19}\text{F NMR}$  (471 MHz,  $\text{CDCl}_3$ ):  $\delta$  -86.91 (s, 6F), -118.58 (dddd,  $J$  = 296.0, 268.1, 28.5, 7.9 Hz, 4F) ppm. **Minor diastereomer:**  $^1\text{H NMR}$  (500 MHz,  $\text{CDCl}_3$ ):  $\delta$  7.71 (d,  $J$  = 8.2 Hz, 2H), 7.35 (d,  $J$  = 8.1 Hz, 2H), 3.63 (dd,  $J$  = 10.4, 5.2 Hz, 2H), 2.97 (dd,  $J$  = 10.5, 7.4 Hz, 2H), 2.44 (s, 3H), 2.18 – 2.07 (m, 2H), 1.96 – 1.68 (m, 4H) ppm.  $^{13}\text{C NMR}$  (126 MHz,  $\text{CDCl}_3$ )  $\delta$  144.3, 132.6, 130.1, 127.7, 52.4 (d,  $J$  = 4.0 Hz), 37.2, 32.9 (t,  $J_{\text{C-F}}$  = 21.9 Hz), 21.7 ppm ( $\text{CF}_2\text{CF}_3$  peaks cannot be identified in detail).  $^{19}\text{F NMR}$  (471 MHz,  $\text{CDCl}_3$ ):  $\delta$  -86.83 (s, 6F), -118.35 (dddd,  $J$  = 266.3, 37.3, 29.8, 8.0 Hz, 4F) ppm. **HRMS**  $m/z$  (ESI): calcd. for  $\text{C}_{17}\text{H}_{17}\text{F}_{10}\text{NO}_2\text{SNa}$   $[\text{M}+\text{Na}]^+$  : 512.0713; found: 512.0709.

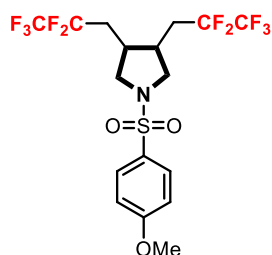

**2b: 1-((4-methoxyphenyl)sulfonyl)-3,4-bis(2,2,3,3,3-pentafluoropropyl)pyrrolidine.** Prepared according to the general procedure. Reaction was run using **1b** (53.5 mg, 0.2 mmol) and  $[\text{CuCF}_2\text{CF}_3]$  (1.0 mL, 0.90 mmol in DMF). The product was purified by flash column chromatography on silica gel (hexane/EA) and obtained as a white solid (0.10 mmol, 52.9 mg, 52 %, dr > 20:1 by GC-MS),  $R_f$  = 0.21 (hexane:EA = 4:1).  $^1\text{H NMR}$  (500 MHz,  $\text{CDCl}_3$ ):  $\delta$  7.77 (d,  $J$  = 7.5 Hz, 2H), 7.01 (d,  $J$  = 7.5 Hz, 2H), 3.87 (s, 3H), 3.45 (dd,  $J$  = 10.2, 5.8 Hz, 2H), 3.22 (dd,  $J$  = 10.4, 4.6 Hz, 2H), 2.00 – 1.72 (m, 4H) ppm.  $^{13}\text{C NMR}$  (126 MHz,  $\text{CDCl}_3$ ):  $\delta$  163.4, 129.5, 128.1, 118.8 (qt,  $J_{\text{C-F}}$  = 285.5, 35.8 Hz), 115.4 (tq,  $J_{\text{C-F}}$  = 253.4, 38.2 Hz), 114.6, 55.8, 51.6, 34.5, 28.4 (t,  $J_{\text{C-F}}$  = 21.7 Hz) ppm.  $^{19}\text{F NMR}$  (471 MHz,  $\text{CDCl}_3$ ):  $\delta$  -86.89 (s, 6F), -117.43 – -119.66 (m, 4F) ppm. **HRMS**  $m/z$  (ESI): calcd. for  $\text{C}_{17}\text{H}_{17}\text{F}_{10}\text{NO}_3\text{SNa}$   $[\text{M}+\text{Na}]^+$  : 528.0662; found: 528.0659.

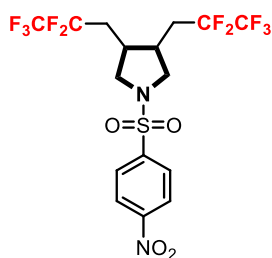

**2c: 1-((4-nitrophenyl)sulfonyl)-3,4-bis(2,2,3,3,3-pentafluoropropyl)pyrrolidine.** Prepared according to the general procedure. Reaction was run using **1c** (56.5 mg, 0.2 mmol) and  $[\text{CuCF}_2\text{CF}_3]$  (1.0 mL, 0.90 mmol in DMF). The product was purified by flash column chromatography on silica gel (hexane/EA) and obtained as a white solid (0.10 mmol, 49.7 mg, 48 %, dr > 20:1 by GC-MS),  $R_f$  = 0.47 (hexane:EA = 4:1).  $^1\text{H NMR}$  (500 MHz,  $\text{CDCl}_3$ ):  $\delta$  8.40 (d,  $J$  = 8.8 Hz, 2H), 8.03 (d,  $J$  = 8.8 Hz, 2H), 3.48 (dd,  $J$  = 10.3, 6.0 Hz, 2H), 3.33 (dd,  $J$  = 10.4, 5.4 Hz, 2H), 2.68 – 2.61 (m, 2H), 2.08 – 1.95 (m, 2H), 1.91 – 1.78 (m, 2H) ppm.  $^{13}\text{C NMR}$  (126 MHz,  $\text{CDCl}_3$ ):  $\delta$  150.5, 142.7, 128.6, 124.8, 118.8 (qt,  $J_{\text{C-F}}$  = 285.3, 35.7 Hz), 115.3 (tq,  $J_{\text{C-F}}$  = 253.8, 38.2 Hz), 51.5 (d,  $J$  = 3.6 Hz), 34.7, 28.4 (t,  $J_{\text{C-F}}$  = 21.8 Hz) ppm.  $^{19}\text{F NMR}$  (471 MHz,  $\text{CDCl}_3$ ):  $\delta$  -86.91 (s, 6F), -118.45 (dddd,  $J$  = 294.7, 267.0, 28.5, 7.6 Hz, 4F) ppm. **HRMS**  $m/z$  (APCI): calcd. for  $\text{C}_{16}\text{H}_{15}\text{F}_{10}\text{N}_2\text{O}_4\text{S}$   $[\text{M}+\text{H}]^+$  : 521.0587; found: 521.0589.

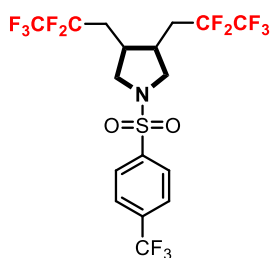

**2d: 3,4-bis(2,2,3,3,3-pentafluoropropyl)-1-((4-(trifluoromethyl)phenyl)sulfonyl)pyrrolidine.** Prepared according to the general procedure. Reaction was run using **1d** (61.1 mg, 0.2 mmol) and  $[\text{CuCF}_2\text{CF}_3]$  (1.0 mL, 0.90 mmol in DMF). The product was purified by flash column chromatography on silica gel (hexane/EA) and obtained as a white solid (0.10 mmol, 54.9 mg, 51 %, dr > 20:1 by GC-MS),  $R_f$  = 0.27 (hexane:EA = 10:1).  $^1\text{H NMR}$  (500 MHz,  $\text{CDCl}_3$ ):  $\delta$  7.97 (d,  $J$  = 8.1 Hz, 2H), 7.83 (d,  $J$  = 8.1 Hz, 2H), 3.49 (dd,  $J$  = 10.2, 5.9 Hz, 2H), 3.29 (dd,  $J$  = 10.3, 5.1 Hz, 2H), 2.67 – 2.59 (m, 2H), 2.04 – 1.91 (m, 2H), 1.85 – 1.70 (m, 2H) ppm.  $^{13}\text{C NMR}$  (126 MHz,  $\text{CDCl}_3$ ):  $\delta$  140.4, 135.0 (q,  $J_{\text{C-F}}$  = 33.2 Hz), 127.8, 126.68 (q,  $J_{\text{C-F}}$  = 3.4 Hz), 123.27 (q,  $J_{\text{C-F}}$  = 272.9 Hz), 118.8 (qt,  $J_{\text{C-F}}$  = 285.5, 35.9 Hz), 115.3 (tq,  $J_{\text{C-F}}$  = 253.4, 38.2 Hz), 51.46 (d,  $J$  = 3.5 Hz), 34.6, 28.34 (t,  $J_{\text{C-F}}$  = 21.7 Hz) ppm.  $^{19}\text{F NMR}$  (471 MHz,  $\text{CDCl}_3$ ):  $\delta$  -64.45 (s, 3F), -86.92 (s, 6F), -118.50 (dddd,  $J$  = 266.8, 35.5, 28.5, 7.4 Hz, 4F) ppm. **HRMS**  $m/z$  (APCI): calcd. for  $\text{C}_{17}\text{H}_{15}\text{F}_{13}\text{NO}_2\text{S}$   $[\text{M}+\text{H}]^+$  : 544.0610; found: 544.0608.

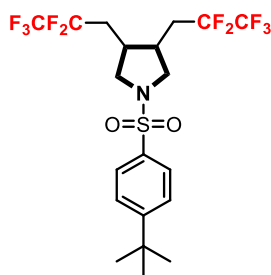

**2e: 1-((4-(*tert*-butyl)phenyl)sulfonyl)-3,4-bis(2,2,3,3,3-pentafluoropropyl)pyrrolidine.** Prepared according to the general procedure. Reaction was run using **1e** (58.7 mg, 0.2 mmol) and  $[\text{CuCF}_2\text{CF}_3]$  (1.0 mL, 0.90 mmol in DMF). The product was purified by flash column chromatography on silica gel (hexane/EA) and obtained as a white solid (0.12 mmol, 62.0 mg, 58 %, dr = 4.8:1 by GC-MS),  $R_f$  = 0.26 (hexane:EA = 10:1). **Major diastereomer:**  $^1\text{H}$  NMR (500 MHz,  $\text{CDCl}_3$ ):  $\delta$  7.75 (d,  $J$  = 8.2 Hz, 2H), 7.55 (d,  $J$  = 8.3 Hz, 2H), 3.50 (dd,  $J$  = 10.2, 5.9 Hz, 2H), 3.23 (dd,  $J$  = 10.4, 5.2 Hz, 2H), 2.63 – 2.55 (m, 2H), 2.00 – 1.87 (m, 2H), 1.81 – 1.67 (m, 2H), 1.33 (s, 9H) ppm.  $^{13}\text{C}$  NMR (126 MHz,  $\text{CDCl}_3$ ):  $\delta$  157.1, 133.5, 127.3, 126.5, 118.8 (qt,  $J_{\text{C-F}}$  = 285.5, 35.8 Hz), 115.4 (tq,  $J_{\text{C-F}}$  = 253.4, 38.1 Hz), 51.5 (d,  $J$  = 3.1 Hz), 35.3, 34.5, 31.1, 28.4 (t,  $J_{\text{C-F}}$  = 21.7 Hz) ppm.  $^{19}\text{F}$  NMR (471 MHz,  $\text{CDCl}_3$ ):  $\delta$  -86.82 (s, 6F), -118.48 (dddd,  $J$  = 266.7, 35.5, 28.3, 7.7 Hz, 4F) ppm. **Minor diastereomer:**  $^1\text{H}$  NMR (500 MHz,  $\text{CDCl}_3$ ):  $\delta$  7.75 (d,  $J$  = 8.2 Hz, 2H), 7.55 (d,  $J$  = 8.3 Hz, 2H), 3.67 – 3.61 (m, 2H), 3.00 (dd,  $J$  = 10.1, 7.0 Hz, 2H), 2.17 – 2.11 (m, 2H), 2.19 – 2.06 (m, 2H), 2.00 – 1.87 (m, 2H), 1.34 (s, 9H) ppm.  $^{13}\text{C}$  NMR (126 MHz,  $\text{CDCl}_3$ ):  $\delta$  157.2, 133.0, 127.6, 126.4, 52.4 (d,  $J$  = 3.9 Hz), 37.2, 35.3, 32.9 (t,  $J_{\text{C-F}}$  = 21.9 Hz), 31.1 ppm ( $\text{CF}_2\text{CF}_3$  peaks cannot be identified in detail).  $^{19}\text{F}$  NMR (471 MHz,  $\text{CDCl}_3$ ):  $\delta$  -86.78 (s, 6F), -118.30 (dddd,  $J$  = 275.1, 266.2, 29.2, 7.8 Hz, 4F) ppm. **HRMS**  $m/z$  (ESI): calcd. for  $\text{C}_{20}\text{H}_{23}\text{F}_{10}\text{NO}_2\text{SNa}$   $[\text{M}+\text{Na}]^+$  : 554.1182; found: 554.1177.

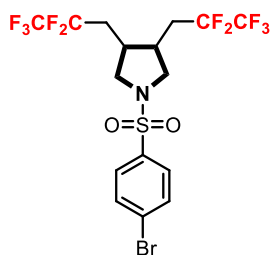

**2f: 1-((4-bromophenyl)sulfonyl)-3,4-bis(2,2,3,3,3-pentafluoropropyl)pyrrolidine.** Prepared according to the general procedure. Reaction was run using **1f** (63.2 mg, 0.2 mmol) and  $[\text{CuCF}_2\text{CF}_3]$  (1.0 mL, 0.90 mmol in DMF). The product was purified by flash column chromatography on silica gel (hexane/EA) and obtained as a white solid (60.8 mg, 0.11 mmol, 55 %, dr > 20:1 by GC-MS),  $R_f$  = 0.21 (hexane:EA = 10:1).  $^1\text{H}$  NMR (500 MHz,  $\text{CDCl}_3$ ):  $\delta$  7.70 (s, 4H), 3.45 (dd,  $J$  = 10.3, 5.9 Hz, 2H), 3.25 (dd,  $J$  = 10.4, 5.2 Hz, 2H), 2.60 (dt,  $J$  = 15.6, 7.6 Hz, 2H), 2.05 – 1.90 (m, 2H), 1.89 – 1.74 (m, 2H) ppm.  $^{13}\text{C}$  NMR (126 MHz,  $\text{CDCl}_3$ ):  $\delta$  135.7, 132.8, 128.9, 128.4, 118.8 (qt,  $J_{\text{C-F}}$  = 285.2, 35.5 Hz), 115.3 (tq,  $J_{\text{C-F}}$  = 253.6, 38.2 Hz), 51.5 (d,  $J$  = 3.4 Hz), 34.6, 28.4 (t,  $J_{\text{C-F}}$  = 21.7 Hz) ppm.  $^{19}\text{F}$  NMR (471 MHz,  $\text{CDCl}_3$ ):  $\delta$  -86.91 (s, 6F), -118.54 (dddd,  $J$  = 266.8, 35.7, 28.4, 7.7 Hz, 4F) ppm. **HRMS**  $m/z$  (ESI): calcd. for  $\text{C}_{16}\text{H}_{14}\text{F}_{10}\text{NO}_2\text{SBrNa}$   $[\text{M}+\text{Na}]^+$  : 577.9641; found: 577.9637.

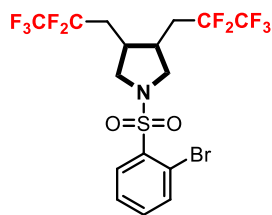

**2g: 1-((2-bromophenyl)sulfonyl)-3,4-bis(2,2,3,3,3-pentafluoropropyl)pyrrolidine.** Prepared according to the general procedure. Reaction was run using **1g** (63.2 mg, 0.2 mmol) and  $[\text{CuCF}_2\text{CF}_3]$  (1.0 mL, 0.90 mmol in DMF). The product was purified by flash column chromatography on silica gel (hexane/EA) and obtained as a white solid (68.8 mg, 0.12 mmol, 62 %, dr = 4.3:1 by GC-MS),  $R_f$  = 0.21 (hexane:EA = 10:1). **Major diastereomer:**  $^1\text{H}$  NMR (500 MHz,  $\text{CDCl}_3$ ):  $\delta$  8.13 (d,  $J$  = 7.5 Hz, 1H), 7.75 (d,  $J$  = 7.8 Hz, 1H), 7.44 (dt,  $J$  = 24.7, 7.5 Hz, 2H), 3.65 (dd,  $J$  = 9.9, 5.9 Hz, 2H), 3.34 (dd,  $J$  = 10.1, 5.1 Hz, 2H), 2.82 – 2.71 (m, 2H), 2.13 – 2.00 (m, 4H) ppm.  $^{13}\text{C}$  NMR (126 MHz,  $\text{CDCl}_3$ ):  $\delta$  138.1, 135.8, 134.1, 132.5, 127.9, 120.5, 119.0 (qt,  $J_{\text{C-F}}$  = 285.5, 35.8 Hz), 115.4 (tq,  $J_{\text{C-F}}$  = 253.5, 38.0 Hz), 51.2 (d,  $J$  = 3.3 Hz), 34.9, 28.4 (t,  $J_{\text{C-F}}$  = 21.8 Hz) ppm.  $^{19}\text{F}$  NMR (471 MHz,  $\text{CDCl}_3$ ):  $\delta$  -86.89 (s, 6F), -118.50 (dddd,  $J$  = 266.8, 38.2, 21.8, 14.2 Hz, 4F) ppm. **Minor diastereomer:**  $^1\text{H}$  NMR (500 MHz,  $\text{CDCl}_3$ ):  $\delta$  8.13 (d,  $J$  = 7.5 Hz, 1H), 7.75 (d,  $J$  = 7.8 Hz, 1H), 7.44 (dt,  $J$  = 24.7, 7.5 Hz, 2H), 3.89 – 3.83 (m, 2H), 3.20 – 3.13 (m, 2H), 2.34 – 2.26 (m, 2H), 2.33 – 2.16 (m, 4H) ppm.  $^{13}\text{C}$  NMR (126 MHz,  $\text{CDCl}_3$ ):  $\delta$  138.0, 135.8, 134.1, 132.5, 127.9, 120.5, 52.2 (d,  $J$  = 4.2 Hz), 37.5, 32.6 (t,  $J_{\text{C-F}}$  = 22.0 Hz) ppm ( $\text{CF}_2\text{CF}_3$  peaks cannot be identified in detail).  $^{19}\text{F}$  NMR (471 MHz,  $\text{CDCl}_3$ ):  $\delta$  -86.79 (s, 6F), -116.93 – -119.55 (m, 4F) ppm. **HRMS**  $m/z$  (ESI): calcd. for  $\text{C}_{16}\text{H}_{14}\text{F}_{10}\text{NO}_2\text{SBrNa}$   $[\text{M}+\text{Na}]^+$  : 577.9641; found: 577.9634.

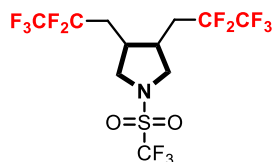

**2h: 3,4-bis(2,2,3,3,3-pentafluoropropyl)-1-((trifluoromethyl)sulfonyl)pyrrolidine.** Prepared according to the general procedure. Reaction was run using **1h** (91.7 mg, 0.4 mmol) and  $[\text{CuCF}_2\text{CF}_3]$  (2.0 mL, 1.8 mmol in DMF). The product was purified by flash column chromatography on silica gel (hexane/EA) and obtained as a yellowish liquid (71.1 mg, 0.15 mmol, 38 %, dr = 4.0:1 by GC-MS),  $R_f$  = 0.09 (hexane:EA = 40:1). **Major diastereomer:**  $^1\text{H}$  NMR (500 MHz,  $\text{CDCl}_3$ ):  $\delta$  3.77 (dd,  $J$  = 10.1, 5.9 Hz, 2H), 3.50 (dd,  $J$  = 10.4, 5.3 Hz, 2H), 2.92 – 2.81 (m, 2H), 2.21 – 1.97 (m, 4H) ppm.  $^{13}\text{C}$  NMR (126 MHz,  $\text{CDCl}_3$ ):  $\delta$  120.3 (q,  $J_{\text{C-F}}$  = 323.0 Hz), 118.8 (qt,  $J_{\text{C-F}}$  = 285.2, 35.7 Hz), 115.3 (tq,  $J_{\text{C-F}}$  = 253.8, 38.2 Hz), 52.2 (d,  $J_{\text{C-F}}$  = 3.8 Hz), 34.9, 28.3 (t,  $J_{\text{C-F}}$  = 21.9 Hz) ppm.  $^{19}\text{F}$  NMR (471 MHz,  $\text{CDCl}_3$ ):  $\delta$  -76.25 (s, 3F), -86.85 (s, 6F), -118.42 (dddd,  $J$  = 274.7, 268.1, 27.7, 7.9 Hz, 4F) ppm. **Minor diastereomer:**  $^1\text{H}$  NMR (500 MHz,  $\text{CDCl}_3$ ):  $\delta$  3.98 (t,  $J$  = 7.8 Hz, 2H), 3.30 (t,  $J$  = 9.2 Hz, 2H), 2.40 – 2.33 (m, 2H), 2.20 – 1.97 (m, 4H) ppm.  $^{13}\text{C}$  NMR (126 MHz,  $\text{CDCl}_3$ ):  $\delta$  52.9 (d,  $J_{\text{C-F}}$  = 4.8 Hz), 37.6, 32.3 (t,  $J_{\text{C-F}}$  = 22.1 Hz) ppm ( $\text{CF}_3$ ,  $\text{CF}_2\text{CF}_3$  peaks cannot be identified in detail).  $^{19}\text{F}$  NMR (471 MHz,  $\text{CDCl}_3$ ):  $\delta$  -76.18 (s, 3F), -86.73 (s, 6F), -116.70 – -119.63 (m, 4F) ppm. **HRMS**  $m/z$  (ESI): calcd. for  $\text{C}_{11}\text{H}_9\text{F}_{13}\text{NO}_2\text{S}$   $[\text{M-H}]^-$  : 466.0152; found: 466.0153.

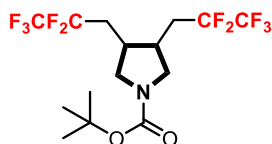

**2i: tert-butyl 3,4-bis(2,2,3,3,3-pentafluoropropyl)pyrrolidine-1-carboxylate.** Prepared according to the general procedure. Reaction was run using **1i** (39.5 mg, 0.2 mmol) and  $[\text{CuCF}_2\text{CF}_3]$  (1.0 mL, 0.90 mmol in DMF). The product was purified by flash column chromatography on silica gel (hexane/EA) and obtained as a colorless liquid (67.2 mg, 0.15 mmol, 77 %, dr = 2.0:1 by GC-MS),  $R_f$  = 0.31 (hexane:EA = 10:1). **Major diastereomer:**  $^1\text{H}$  NMR (500 MHz,  $\text{CDCl}_3$ ):  $\delta$  3.54 (ddd,  $J$  = 35.8, 10.9, 5.8 Hz, 2H), 3.33 – 3.22 (m, 2H), 2.72 – 2.63 (m, 2H), 2.30 – 1.90 (m, 4H), 1.45 (s, 9H) ppm.  $^{13}\text{C}$  NMR (126 MHz,  $\text{CDCl}_3$ ):  $\delta$  154.6, 118.98 (qt,  $J_{\text{C-F}}$  = 285.4, 35.9 Hz), 115.6 (tqd,  $J_{\text{C-F}}$  = 253.4, 37.9, 11.4 Hz), 80.2, 49.9 (d,  $J$  = 58.6 Hz), 34.17 (d,  $J$  = 82.5 Hz), 28.8 (t,  $J_{\text{C-F}}$  = 21.6 Hz), 28.5 ppm.  $^{19}\text{F}$  NMR (471 MHz,  $\text{CDCl}_3$ ):  $\delta$  -86.68 (d,  $J$  = 30.1 Hz, 6F), -116.61 – -119.56 (m, 4F) ppm. **Minor diastereomer:**  $^1\text{H}$  NMR (500 MHz,  $\text{CDCl}_3$ ):  $\delta$  3.82 (d,  $J$  = 51.9 Hz, 2H), 3.06 (d,  $J$  = 7.9 Hz, 2H), 2.30 – 1.90 (m, 6H), 1.45 (s, 9H) ppm.  $^{13}\text{C}$  NMR (126 MHz,  $\text{CDCl}_3$ ):  $\delta$  154.0, 80.1, 50.8 (d,  $J$  = 33.5 Hz), 36.9 (d,  $J$  = 98.4 Hz), 32.6 (t,  $J_{\text{C-F}}$  = 22.0 Hz), 28.6 ppm ( $\text{CF}_2\text{CF}_3$  peaks cannot be identified in detail).  $^{19}\text{F}$  NMR (471 MHz,  $\text{CDCl}_3$ ):  $\delta$  -86.60 (d,  $J$  = 11.4 Hz, 6F), -116.61 – -119.56 (m, 4F) ppm. **HRMS**  $m/z$  (ESI): calcd. for  $\text{C}_{15}\text{H}_{19}\text{F}_{10}\text{NO}_2\text{Na}$   $[\text{M}+\text{Na}]^+$  : 458.1148; found: 458.1146.

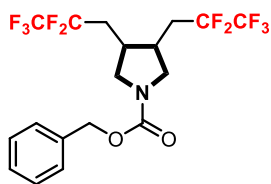

**2j: benzyl 3,4-bis(2,2,3,3,3-pentafluoropropyl)pyrrolidine-1-carboxylate.** Prepared according to the general procedure. Reaction was run using **1j** (46.3 mg, 0.2 mmol) and  $[\text{CuCF}_2\text{CF}_3]$  (1.0 mL, 0.90 mmol in DMF). The product was purified by flash column chromatography on silica gel (hexane/EA) and obtained as a colorless liquid (74.5 mg, 0.16 mmol, 79 %, dr = 2.1:1 by GC-MS),  $R_f$  = 0.22 (hexane:EA = 10:1). **Major diastereomer:**  $^1\text{H}$  NMR (500 MHz,  $\text{CDCl}_3$ ):  $\delta$  7.43 – 7.29 (m, 5H), 5.15 (p,  $J$  = 12.3 Hz, 2H), 3.64 (ddd,  $J$  = 20.4, 11.2, 6.2 Hz, 2H), 3.38 (dd,  $J$  = 11.0, 4.8 Hz, 2H), 2.79 – 2.65 (m, 2H), 2.36 – 1.90 (m, 4H) ppm.  $^{13}\text{C}$  NMR (126 MHz,  $\text{CDCl}_3$ ):  $\delta$  154.9, 136.6, 128.6, 128.1, 118.9 (qt,  $J_{\text{C-F}}$  = 286.2, 36.3 Hz), 115.5 (tqd,  $J_{\text{C-F}}$  = 251.2, 36.2, 7.3 Hz), 67.2, 50.0 (d,  $J$  = 35.9 Hz), 34.2 (d,  $J$  = 91.4 Hz), 28.6 (td,  $J_{\text{C-F}}$  = 21.7, 13.6 Hz) ppm.  $^{19}\text{F}$  NMR (471 MHz,  $\text{CDCl}_3$ ):  $\delta$  -86.67 (d,  $J$  = 20.5 Hz, 6F), -116.55 – -119.52 (m, 4F) ppm. **Minor diastereomer:**  $^1\text{H}$  NMR (500 MHz,  $\text{CDCl}_3$ ):  $\delta$  7.43 – 7.29 (m, 5H), 5.22 – 5.08 (m, 2H), 3.99 – 3.86 (m, 2H), 3.15 (t,  $J$  = 9.9 Hz, 2H), 2.36 – 1.90 (m, 6H) ppm.  $^{13}\text{C}$  NMR (126 MHz,  $\text{CDCl}_3$ ):  $\delta$  154.4, 136.7, 128.2, 128.2, 67.2, 50.9 (d,  $J$  = 48.3 Hz), 36.9 (d,  $J$  = 102.8 Hz), 32.5 (t,  $J_{\text{C-F}}$  = 22.1 Hz) ppm ( $\text{CF}_2\text{CF}_3$  peaks cannot be identified in detail).  $^{19}\text{F}$  NMR (471 MHz,  $\text{CDCl}_3$ ):  $\delta$  -86.60 (d,  $J$  = 11.9 Hz, 6F), -116.55 – -119.52 (m, 4F) ppm. **HRMS**  $m/z$  (ESI): calcd. for  $\text{C}_{18}\text{H}_{17}\text{F}_{10}\text{NO}_2\text{Na}$   $[\text{M}+\text{Na}]^+$  : 492.0992; found: 492.0982.

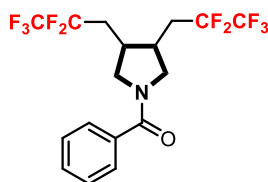

**2k: 3,4-bis(2,2,3,3,3-pentafluoropropyl)pyrrolidin-1-yl(phenyl)methanone.** Prepared according to the general procedure. Reaction was run using **1k** (40.3 mg, 0.2 mmol) and  $[\text{CuCF}_2\text{CF}_3]$  (1.0 mL, 0.90 mmol in DMF). The product was purified by flash column chromatography on silica gel (hexane/EA) and obtained as a yellowish liquid (59.8 mg, 0.14 mmol, 68 %, dr = 2.6:1 by GC-MS),  $R_f$  = 0.13 (hexane:EA = 5:1). **Major diastereomer:**  $^1\text{H}$  NMR (500 MHz,  $\text{CDCl}_3$ ):  $\delta$  7.52 – 7.38 (m, 5H), 3.86 (dd,  $J$  = 12.6, 7.2 Hz, 1H), 3.66 (dd,  $J$  = 11.2, 5.8 Hz, 1H), 3.57 (dd,  $J$  = 12.6, 7.4 Hz, 1H), 3.47 (dd,  $J$  = 11.2, 4.7 Hz, 1H), 2.88 – 2.79 (m, 1H), 2.75 – 2.67 (m, 1H), 2.37 – 1.84 (m, 4H) ppm.  $^{13}\text{C}$  NMR (126 MHz,  $\text{CDCl}_3$ ):  $\delta$  170.4, 135.9, 130.6, 128.6, 127.2, 118.9 (qtd,  $J_{\text{C-F}}$  = 285.2, 35.8, 15.2 Hz), 115.5 (tq,  $J_{\text{C-F}}$  = 253.4, 38.4 Hz), 51.7 (dd,  $J$  = 419.8, 2.5 Hz), 34.2 (d,  $J$  = 193.8 Hz), 28.5 (dt,  $J_{\text{C-F}}$  = 139.3, 21.6 Hz) ppm.  $^{19}\text{F}$  NMR (471 MHz,  $\text{CDCl}_3$ ):  $\delta$  -86.83 (d,  $J$  = 59.6 Hz, 6F), -116.61 – -119.79 (m, 4F) ppm. **Minor diastereomer:**  $^1\text{H}$  NMR (500 MHz,  $\text{CDCl}_3$ ):  $\delta$  7.52 – 7.38 (m, 5H), 4.11 (td,  $J$  = 11.2, 4.2 Hz, 1H), 3.86 – 3.79 (m, 1H), 3.46 – 3.40 (m, 1H), 3.30 (t,  $J$  = 10.1 Hz, 1H), 2.37 – 1.84 (m, 6H) ppm.  $^{13}\text{C}$  NMR (126 MHz,  $\text{CDCl}_3$ ):  $\delta$  169.7, 135.9, 130.6, 128.6, 127.3, 52.7 (dd,  $J$  = 372.5, 2.0 Hz), 36.9 (d,  $J$  = 208.7 Hz), 32.4 (dt,  $J_{\text{C-F}}$  = 74.5, 22.0 Hz) ppm ( $\text{CF}_2\text{CF}_3$  peaks cannot be identified in detail).  $^{19}\text{F}$  NMR (471 MHz,  $\text{CDCl}_3$ ):  $\delta$  -86.75 (d,  $J$  = 33.6 Hz, 6F), -116.61 – -119.79 (m, 4F) ppm. **HRMS**  $m/z$  (ESI): calcd. for  $\text{C}_{17}\text{H}_{15}\text{F}_{10}\text{NONa}$   $[\text{M}+\text{Na}]^+$  : 462.0886; found: 462.0882.

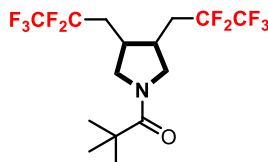

**2l: 3,4-bis(2,2,3,3,3-pentafluoropropyl)pyrrolidin-1-yl-2,2-dimethylpropan-1-one.** Prepared according to the general procedure. Reaction was run using **1l** (36.3 mg, 0.2 mmol) and  $[\text{CuCF}_2\text{CF}_3]$  (1.0 mL, 0.90 mmol in DMF). The product was purified by flash column chromatography on silica gel (hexane/EA) and obtained as a colorless liquid (38.4 mg, 0.09 mmol, 46 %, dr > 20:1 by GC-MS),  $R_f$  = 0.30 (hexane:EA = 4:1).  $^1\text{H}$  NMR (500 MHz,  $\text{CDCl}_3$ ):  $\delta$  3.72 (dd,  $J$  = 11.3, 6.4 Hz, 2H), 3.31 (br, 1H), 2.71 (s, 2H), 2.27 – 1.65 (m, 5H), 1.24 (s, 9H) ppm.  $^{13}\text{C}$  NMR (126 MHz,  $\text{CDCl}_3$ ):  $\delta$  177.3, 118.9 (qt,  $J_{\text{C-F}}$  = 285.4, 35.8 Hz), 115.6 (tq,  $J_{\text{C-F}}$  = 289.8, 37.7 Hz), 51.7, 39.0, 33.9 (d,  $J$  = 398.4 Hz), 27.4 ppm.  $^{19}\text{F}$  NMR (471 MHz,  $\text{CDCl}_3$ ):  $\delta$  -85.72 (s, 6F), -116.99 (dt,  $J$  = 507.2, 281.0 Hz, 4F) ppm. **HRMS**  $m/z$  (ESI): calcd. for  $\text{C}_{15}\text{H}_{19}\text{F}_{10}\text{NONa}$   $[\text{M}+\text{Na}]^+$  : 442.1199; found: 442.1191.

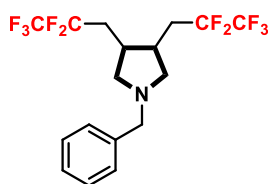

**2m: 1-benzyl-3,4-bis(2,2,3,3,3-pentafluoropropyl)pyrrolidine.** Prepared according to the general procedure. Reaction was run using **1m** (37.5 mg, 0.2 mmol) and  $[\text{CuCF}_2\text{CF}_3]$  (1.0 mL, 0.90 mmol in DMF). The product was purified by flash column chromatography on silica gel (hexane/EA) and obtained as a yellowish liquid (45.9 mg, 0.11 mmol, 54 %, dr = 2.1:1 by GC-MS),  $R_f$  = 0.37 (hexane:EA = 10:1). **Major diastereomer:**  $^1\text{H}$  NMR (500 MHz,  $\text{CDCl}_3$ ):  $\delta$  7.37 – 7.27 (m, 5H), 3.70 (s, 2H), 2.98 (t,  $J$  = 7.6 Hz, 2H), 2.78 – 2.68 (m, 2H), 2.52 – 2.45 (m, 2H), 2.30 – 1.97 (m, 4H) ppm.  $^{13}\text{C}$  NMR (126 MHz,  $\text{CDCl}_3$ ):  $\delta$  138.3, 128.8, 128.6, 127.4, 119.1 (qt,  $J_{\text{C-F}}$  = 288.3, 37.3 Hz), 115.8 (tq,  $J_{\text{C-F}}$  = 254.2, 38.4 Hz), 60.0, 58.6, 33.4, 30.3 (t,  $J_{\text{C-F}}$  = 21.3 Hz) ppm.  $^{19}\text{F}$  NMR (471 MHz,  $\text{CDCl}_3$ ):  $\delta$  -86.92 (s, 6F), -118.60 (dddd,  $J$  = 266.1, 37.0, 23.0, 14.4 Hz, 4F) ppm. **Minor diastereomer:**  $^1\text{H}$  NMR (500 MHz,  $\text{CDCl}_3$ ):  $\delta$  7.37 – 7.27 (m, 5H), 3.63 (d,  $J$  = 3.6 Hz, 2H), 2.88 (t,  $J$  = 7.6 Hz, 2H), 2.42 (dd,  $J$  = 8.9, 4.3 Hz, 2H), 2.30 – 1.97 (m, 6H) ppm.  $^{13}\text{C}$  NMR (126 MHz,  $\text{CDCl}_3$ ):  $\delta$  138.0, 129.0, 128.9, 127.5, 59.8, 59.5, 37.4, 34.8 (t,  $J_{\text{C-F}}$  = 21.7 Hz) ppm ( $\text{CF}_2\text{CF}_3$  peaks cannot be identified in detail).  $^{19}\text{F}$  NMR (471 MHz,  $\text{CDCl}_3$ ):  $\delta$  -86.90 (s, 6F), -117.58 – -119.62 (m, 4F) ppm. **HRMS**  $m/z$  (ESI): calcd. for  $\text{C}_{17}\text{H}_{18}\text{F}_{10}\text{N}$   $[\text{M}+\text{H}]^+$  : 426.1274; found: 426.1263.

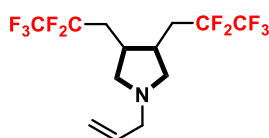

**2n: 1-allyl-3,4-bis(2,2,3,3,3-pentafluoropropyl)pyrrolidine.** Prepared according to the general procedure. Reaction was run using **1n** (54.9 mg, 0.4 mmol) and  $[\text{CuCF}_2\text{CF}_3]$  (2.0 mL, 1.8 mmol in DMF). The product was purified by flash column chromatography on silica gel (hexane/EA) and obtained as a colorless liquid (25.9 mg, 0.07 mmol, 17 %, dr > 20:1 by GC-MS),  $R_f$  = 0.13 (hexane:EA = 10:1). **Major diastereomer:**  $^1\text{H}$  NMR (500 MHz,  $\text{CDCl}_3$ ):  $\delta$  5.86 (ddt,  $J$  = 16.8, 10.2, 6.4 Hz, 1H), 5.17 (dd,  $J$  = 37.0, 13.6 Hz, 2H), 3.14 (d,  $J$  = 6.4 Hz, 2H), 2.97 (dd,  $J$  = 8.4, 6.8 Hz, 2H), 2.77 – 2.63 (m, 2H), 2.41 (dd,  $J$  = 9.3, 5.8 Hz, 2H), 2.17 – 1.94 (m, 4H) ppm.  $^{19}\text{F}$  NMR (471 MHz,  $\text{CDCl}_3$ ):  $\delta$  -86.93 (s, 6F), -118.65 (dddd,  $J$  = 266.0, 36.8, 27.2, 10.1 Hz, 4F) ppm. **HRMS**  $m/z$  (ESI): calcd. for  $\text{C}_{13}\text{H}_{16}\text{F}_{10}\text{N}$   $[\text{M}+\text{H}]^+$  : 376.1118; found: 376.1107.

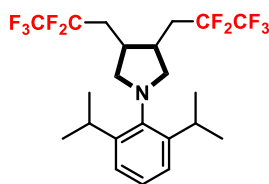

**2o: 1-(2,6-diisopropylphenyl)-3,4-bis(2,2,3,3,3-pentafluoropropyl)pyrrolidine.** Prepared according to the general procedure. Reaction was run using **1o** (51.5 mg, 0.2 mmol) and  $[\text{CuCF}_2\text{CF}_3]$  (1.0 mL, 0.90 mmol in DMF). The product was purified by flash column chromatography on silica gel (hexane) and obtained as a yellowish liquid (83.3 mg, 0.17 mmol, 84 %, dr = 3.4:1 by GC-MS),  $R_f$  = 0.52 (hexane). **Major diastereomer:**  $^1\text{H}$  NMR (500 MHz,  $\text{CDCl}_3$ ):  $\delta$  7.24 (t,  $J$  = 7.6 Hz, 1H), 7.15 (d,  $J$  = 7.5 Hz, 2H), 3.51 (dd,  $J$  = 8.5, 6.1 Hz, 2H), 3.44 – 3.33 (m, 1H), 3.28 – 3.13 (m, 3H), 2.98 – 2.87 (m, 2H), 2.42 – 2.13 (m, 4H), 1.26 (ddd,  $J$  = 20.1, 14.9, 6.0 Hz, 12H) ppm.  $^{13}\text{C}$  NMR (126 MHz,  $\text{CDCl}_3$ ):  $\delta$  149.7, 140.9, 127.2, 123.7, 119.2 (qt,  $J_{\text{C-F}}$  = 285.2, 36.1 Hz), 116.0 (tq,  $J_{\text{C-F}}$  = 252.8, 37.7 Hz), 57.2 (d,  $J$  = 2.9 Hz), 35.7, 29.3 (t,  $J_{\text{C-F}}$  = 21.6 Hz), 28.4, 24.5 (d,  $J$  = 33.7 Hz) ppm.  $^{19}\text{F}$  NMR



(471 MHz, CDCl<sub>3</sub>):  $\delta$  -86.89 (s, 6F), -118.47 (dddd,  $J$  = 276.7, 266.3, 28.3, 9.0 Hz, 4F) ppm. **Minor diastereomer:** <sup>1</sup>H NMR (500 MHz, CDCl<sub>3</sub>):  $\delta$  7.27 – 7.21 (m, 1H), 7.18 – 7.12 (m, 2H), 3.59 (d,  $J$  = 6.8 Hz, 2H), 3.29 – 3.15 (m, 1H), 3.09 – 2.99 (m, 3H), 2.54 – 2.44 (m, 2H), 2.42 – 2.13 (m, 4H), 1.43 – 1.17 (m, 12H) ppm. <sup>13</sup>C NMR (126 MHz, CDCl<sub>3</sub>):  $\delta$  150.2, 127.3, 125.0, 124.4, 58.7, 38.5, 33.6 (t,  $J_{C-F}$  = 21.8 Hz), 28.3, 24.6 (d,  $J$  = 66.1 Hz) ppm (CF<sub>2</sub>CF<sub>3</sub> peaks cannot be identified in detail). <sup>19</sup>F NMR (471 MHz, CDCl<sub>3</sub>):  $\delta$  -86.73 (s, 6F), -117.09 – -119.45 (m, 4F) ppm. **HRMS**  $m/z$  (ESI): calcd. for C<sub>22</sub>H<sub>28</sub>F<sub>10</sub>N [M+H]<sup>+</sup> : 496.2057; found: 496.2050.

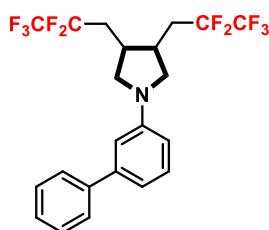

**2p: 1-([1,1'-biphenyl]-3-yl)-3,4-bis(2,2,3,3,3-pentafluoropropyl)pyrrolidine.** Prepared according to the general procedure. Reaction was run using **1p** (50.0 mg, 0.2 mmol) and [CuCF<sub>2</sub>CF<sub>3</sub>] (1.0 mL, 0.90 mmol in DMF). The product was purified by flash column chromatography on silica gel (hexane/EA) and obtained as a yellowish solid (61.7 mg, 0.13 mmol, 63 %, dr = 2.1:1 by GC-MS),  $R_f$  = 0.17 (hexane). **Major diastereomer:** <sup>1</sup>H NMR (500 MHz, CDCl<sub>3</sub>):  $\delta$  7.62 (d,  $J$  = 7.9 Hz, 2H), 7.46 (t,  $J$  = 7.5 Hz, 2H), 7.41 – 7.33 (m, 2H), 7.00 (d,  $J$  = 7.1 Hz, 1H), 6.78 (s, 1H), 6.64 – 6.58 (m, 1H), 3.59 (dd,  $J$  = 9.3, 6.0 Hz, 2H), 3.40 (dd,  $J$  = 9.5, 4.8 Hz, 2H), 2.94 – 2.82 (m, 2H), 2.49 – 2.08 (m, 4H) ppm. <sup>13</sup>C NMR (126 MHz, CDCl<sub>3</sub>):  $\delta$  147.6, 142.8, 142.0, 129.8, 128.8, 127.5, 119.1 (qt,  $J_{C-F}$  = 285.2, 35.9 Hz), 115.8 (tq,  $J_{C-F}$  = 253.2, 37.8 Hz), 116.1, 110.9, 110.7, 52.1 (d,  $J$  = 2.7 Hz), 34.5, 29.2 (t,  $J_{C-F}$  = 21.7 Hz) ppm. <sup>19</sup>F NMR (471 MHz, CDCl<sub>3</sub>):  $\delta$  -86.80 (s, 6F), -118.37 (dddd,  $J$  = 276.4, 267.0, 25.8, 11.4 Hz, 4F) ppm. **Minor diastereomer:** <sup>1</sup>H NMR (500 MHz, CDCl<sub>3</sub>):  $\delta$  7.66 – 7.58 (m, 2H), 7.49 – 7.43 (m, 2H), 7.41 – 7.33 (m, 2H), 7.03 – 6.97 (m, 1H), 6.80 (s, 1H), 6.64 – 6.58 (m, 1H), 3.85 – 3.76 (m, 2H), 3.25 – 3.18 (m, 2H), 2.49 – 2.08 (m, 6H) ppm. <sup>13</sup>C NMR (126 MHz, CDCl<sub>3</sub>):  $\delta$  147.2, 142.7, 142.0, 129.8, 128.8, 127.4, 116.3, 111.1, 110.9, 53.2, 37.2, 33.17 (t,  $J_{C-F}$  = 21.9 Hz) ppm (CF<sub>2</sub>CF<sub>3</sub> peaks cannot be identified in detail). <sup>19</sup>F NMR (471 MHz, CDCl<sub>3</sub>):  $\delta$  -86.73 (s, 6F), -116.87 – -119.49 (m, 4F) ppm. **HRMS**  $m/z$  (APCI): calcd. for C<sub>22</sub>H<sub>20</sub>F<sub>10</sub>N [M+H]<sup>+</sup> : 488.1431; found: 488.1430.

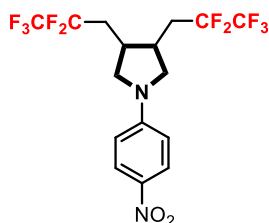

**2q: 1-(4-nitrophenyl)-3,4-bis(2,2,3,3,3-pentafluoropropyl)pyrrolidine.** Prepared according to the general procedure. Reaction was run using **1q** (43.7 mg, 0.2 mmol) and [CuCF<sub>2</sub>CF<sub>3</sub>] (1.0 mL, 0.90 mmol in DMF). The product was purified by flash column chromatography on silica gel (hexane/EA) and obtained as two yellowish liquids (major diastereomer: 39.5 mg; minor diastereomer: 28.9 mg, total 68.4 mg, 0.15 mmol, 75 %, dr = 1.4:1 by isolation),  $R_f$  = 0.21, 0.24 (hexane:EA = 10:1). **Major diastereomer:** <sup>1</sup>H NMR (500 MHz, CDCl<sub>3</sub>):  $\delta$  8.10 (d,

$J = 9.1$  Hz, 2H), 6.49 (d,  $J = 9.1$  Hz, 2H), 3.64 (dd,  $J = 10.1, 5.9$  Hz, 2H), 3.41 (dd,  $J = 10.3, 5.0$  Hz, 2H), 2.98 – 2.89 (m, 2H), 2.27 – 2.02 (m, 4H) ppm.  $^{13}\text{C}$  NMR (126 MHz,  $\text{CDCl}_3$ ):  $\delta$  151.5, 137.9, 126.4, 118.9 (qt,  $J_{\text{C-F}} = 285.4, 35.3$  Hz), 115.6 (tq,  $J_{\text{C-F}} = 253.2, 38.0$  Hz), 110.8, 52.0 (d,  $J = 3.3$  Hz), 34.4, 29.0 (t,  $J_{\text{C-F}} = 21.7$  Hz) ppm.  $^{19}\text{F}$  NMR (471 MHz,  $\text{CDCl}_3$ ):  $\delta$  -86.81 (s, 6F), -118.32 (dddd,  $J = 266.9, 35.8, 28.0, 8.3$  Hz, 4F) ppm. **Minor diastereomer:**  $^1\text{H}$  NMR (500 MHz,  $\text{CDCl}_3$ ):  $\delta$  8.11 (d,  $J = 9.2$  Hz, 2H), 6.50 (d,  $J = 9.3$  Hz, 2H), 3.88 – 3.81 (m, 2H), 3.26 – 3.20 (m, 2H), 2.49 – 2.31 (m, 4H), 2.22 – 2.08 (m, 2H) ppm.  $^{13}\text{C}$  NMR (126 MHz,  $\text{CDCl}_3$ ):  $\delta$  150.9, 137.8, 126.4, 118.9 (qt,  $J_{\text{C-F}} = 285.5, 35.7$  Hz), 115.4 (tq,  $J_{\text{C-F}} = 253.1, 38.2$  Hz), 110.7, 52.9 (d,  $J = 4.2$  Hz), 37.1, 32.7 (t,  $J_{\text{C-F}} = 22.1$  Hz) ppm.  $^{19}\text{F}$  NMR (471 MHz,  $\text{CDCl}_3$ ):  $\delta$  -86.71 (s, 6F), -118.15 (dddd,  $J = 274.8, 266.1, 29.8, 7.1$  Hz, 4F) ppm. **HRMS**  $m/z$  (ESI): calcd. for  $\text{C}_{16}\text{H}_{14}\text{F}_{10}\text{N}_2\text{O}_2\text{Na}$   $[\text{M}+\text{Na}]^+$ : 479.0788; found: 479.0776.

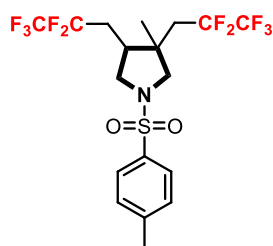

**2r: 3-methyl-3,4-bis(2,2,3,3,3-pentafluoropropyl)-1-tosylpyrrolidine.** Prepared according to the general procedure. Reaction was run using **1r** (53.1 mg, 0.2 mmol) and  $[\text{CuCF}_2\text{CF}_3]$  (1.0 mL, 0.90 mmol in DMF). The product was purified by flash column chromatography on silica gel (hexane/EA) and obtained as a yellowish solid (83.0 mg, 0.16 mmol, 82 %, dr = 1.9:1 by GC-MS),  $R_f = 0.51$  (hexane:EA = 4:1). **Major diastereomer:**  $^1\text{H}$  NMR (500 MHz,  $\text{CDCl}_3$ ):  $\delta$  7.70 (d,  $J = 8.0$  Hz, 2H), 7.33 (d,  $J = 7.9$  Hz, 2H), 3.63 (d,  $J = 10.3$  Hz, 2H), 3.02 (dd,  $J = 96.4, 9.8$  Hz, 2H), 2.42 (s, 3H), 2.14 – 1.64 (m, 5H), 1.19 (s, 3H) ppm.  $^{13}\text{C}$  NMR (126 MHz,  $\text{CDCl}_3$ ):  $\delta$  144.1, 133.7, 130.0, 127.4, 123.04 – 112.71 (m,  $\text{CF}_2\text{CF}_3$  peaks), 57.3 (d,  $J = 5.9$  Hz), 50.9 (d,  $J = 4.5$  Hz), 42.7, 42.2, 31.1 (t,  $J_{\text{C-F}} = 20.2$  Hz), 28.8 (t,  $J_{\text{C-F}} = 21.9$  Hz), 21.9 (d,  $J = 3.5$  Hz), 21.6 ppm.  $^{19}\text{F}$  NMR (471 MHz,  $\text{CDCl}_3$ ):  $\delta$  -86.81 (s, 3F), -87.72 (s, 3F), -114.89 (ddd,  $J = 264.8, 34.2, 3.5$  Hz, 1F), -117.07 (ddd,  $J = 265.6, 31.1, 5.5$  Hz, 1F), -118.12 (ddd,  $J = 264.8, 32.2, 4.9$  Hz, 1F), -120.01 (ddd,  $J = 265.3, 27.8, 8.2$  Hz, 1F) ppm. **Minor diastereomer:**  $^1\text{H}$  NMR (500 MHz,  $\text{CDCl}_3$ ):  $\delta$  7.71 (d,  $J = 7.9$  Hz, 2H), 7.34 (d,  $J = 8.0$  Hz, 2H), 3.69 – 3.45 (m, 2H), 3.15 – 2.99 (m, 2H), 2.43 (s, 3H), 2.14 – 1.64 (m, 5H), 0.89 (s, 3H) ppm.  $^{13}\text{C}$  NMR (126 MHz,  $\text{CDCl}_3$ ):  $\delta$  144.1, 133.7, 130.0, 127.5, 122.59 – 112.61 (m,  $\text{CF}_2\text{CF}_3$  peaks), 58.9 (d,  $J = 6.4$  Hz), 50.2 (d,  $J = 4.7$  Hz), 41.7, 40.8, 37.4 (t,  $J_{\text{C-F}} = 20.9$  Hz), 29.0 (t,  $J = 22.0$  Hz), 21.6, 18.1 (d,  $J = 3.9$  Hz) ppm.  $^{19}\text{F}$  NMR (471 MHz,  $\text{CDCl}_3$ ):  $\delta$  -86.77 (s, 3F), -87.56 (s, 3F), -114.62 (ddd,  $J = 264.9, 35.7, 6.0$  Hz, 1F), -116.62 – -117.30 (m, 1F), -118.43 (dd,  $J = 264.8, 33.8$  Hz, 1F), -119.90 (ddd,  $J = 265.4, 28.6, 8.3$  Hz, 1F) ppm. **HRMS**  $m/z$  (ESI): calcd. for  $\text{C}_{18}\text{H}_{19}\text{F}_{10}\text{NO}_2\text{SNa}$   $[\text{M}+\text{Na}]^+$ : 526.0869; found: 526.0857.

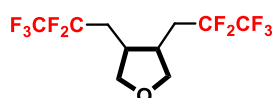

**2s: 3,4-bis(2,2,3,3,3-pentafluoropropyl)tetrahydrofuran.** Prepared according to the general procedure. Reaction was run using **1s** (19.6 mg, 0.2 mmol) and  $[\text{CuCF}_2\text{CF}_3]$  (1.0 mL, 0.90 mmol in DMF). The crude product was analyzed by  $^{19}\text{F}$  NMR (79 %) using  $\text{PhCF}_3$  as the internal standard and GC-MS ( $\text{dr} = 4.2:1$ ). **Major diastereomer:**  $^{19}\text{F}$  NMR (471 MHz,  $\text{CDCl}_3$ ):  $\delta$  -86.85 (s, 6F), -118.29 (dddd,  $J = 265.4, 37.1, 29.1, 8.5$  Hz, 4F) ppm. **Minor diastereomer:**  $^{19}\text{F}$  NMR (471 MHz,  $\text{CDCl}_3$ ):  $\delta$  -86.82 (s, 6F), -118.19 (dddd,  $J = 274.9, 265.7, 30.0, 8.3$  Hz, 4F) ppm.

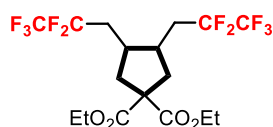

**4a: diethyl 3,4-bis(2,2,3,3,3-pentafluoropropyl)cyclopentane-1,1-dicarboxylate.** Prepared according to the general procedure. Reaction was run using **3a** (48.1 mg, 0.2 mmol) and  $[\text{CuCF}_2\text{CF}_3]$  (1.0 mL, 0.90 mmol in DMF). The product was purified by flash column chromatography on silica gel (hexane/DCM) and obtained as a yellowish liquid (75.7 mg, 0.16 mmol, 79 %,  $\text{dr} = 11:1$  by GC-MS),  $R_f = 0.65$  (hexane:DCM = 1:1 twice). **Major diastereomer:**  $^1\text{H}$  NMR (500 MHz,  $\text{CDCl}_3$ ):  $\delta$  4.19 (qn,  $J = 10.1$  Hz, 4H), 2.55 – 2.52 (m, 4H), 2.26 – 2.23 (m, 2H), 2.05 – 1.97 (m, 4H), 1.24 (td,  $J = 7.1, 3.7$  Hz, 6H) ppm.  $^{13}\text{C}$  NMR (126 MHz,  $\text{CDCl}_3$ ):  $\delta$  172.3 (d,  $J = 68.6$  Hz), 119.1 (qt,  $J_{\text{C-F}} = 273.3, 36.2$  Hz), 115.8 (tq,  $J_{\text{C-F}} = 252.3, 37.7$  Hz), 62.1 (d,  $J = 13.6$  Hz), 58.2, 38.8 (d,  $J = 2.2$  Hz), 35.4, 29.6 (t,  $J_{\text{C-F}} = 21.6$  Hz), 14.1 (d,  $J = 7.8$  Hz) ppm.  $^{19}\text{F}$  NMR (377 MHz,  $\text{CDCl}_3$ ):  $\delta$  -86.94 (s, 6F), -118.35 (dddd,  $J = 279.6, 266.6, 23.4, 14.4$  Hz, 4F) ppm. **HRMS**  $m/z$  (ESI): calcd. for  $\text{C}_{17}\text{H}_{20}\text{F}_{10}\text{O}_4\text{Na}$   $[\text{M}+\text{Na}]^+$  : 501.1094; found: 501.1091.

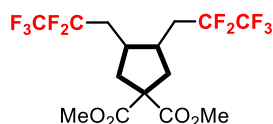

**4b: dimethyl 3,4-bis(2,2,3,3,3-pentafluoropropyl)cyclopentane-1,1-dicarboxylate.** Prepared according to the general procedure. Reaction was run using **3b** (42.5 mg, 0.2 mmol) and  $[\text{CuCF}_2\text{CF}_3]$  (1.0 mL, 0.90 mmol in DMF). The product was purified by flash column chromatography on silica gel (hexane/DCM) and obtained as a yellowish liquid (72.0 mg, 0.16 mmol, 80 %,  $\text{dr} = 10:1$  by GC-MS),  $R_f = 0.63$  (hexane:DCM = 1:1 twice). **Major diastereomer:**  $^1\text{H}$  NMR (500 MHz,  $\text{CDCl}_3$ ):  $\delta$  3.74 (d,  $J = 6.2$  Hz, 6H), 2.56 – 2.53 (m, 4H), 2.28 – 2.25 (m, 2H), 2.05 – 1.97 (m, 4H) ppm.  $^{13}\text{C}$  NMR (126 MHz,  $\text{CDCl}_3$ ):  $\delta$  172.7 (d,  $J = 68.2$  Hz), 119.1 (qt,  $J_{\text{C-F}} = 285.2, 35.8$  Hz), 115.8 (tq,  $J_{\text{C-F}} = 252.3, 37.7$  Hz), 58.1, 53.2 (d,  $J = 1.4$  Hz), 38.9 (d,  $J = 2.2$  Hz), 35.4, 29.6 (t,  $J_{\text{C-F}} = 21.6$  Hz) ppm.  $^{19}\text{F}$  NMR (471 MHz,  $\text{CDCl}_3$ ):  $\delta$  -86.97 (s, 6F), -117.13 – -119.64 (m, 4F) ppm. **HRMS**  $m/z$  (ESI): calcd. for  $\text{C}_{15}\text{H}_{16}\text{F}_{10}\text{O}_4\text{Na}$   $[\text{M}+\text{Na}]^+$  : 473.0778; found: 473.0779.

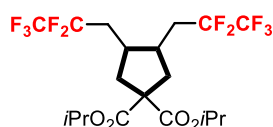

**4c: diisopropyl 3,4-bis(2,2,3,3,3-pentafluoropropyl)cyclopentane-1,1-dicarboxylate.** Prepared according to the general procedure. Reaction was run using **3c** (53.7 mg, 0.2 mmol) and  $[\text{CuCF}_2\text{CF}_3]$  (1.0 mL, 0.90 mmol in DMF). The product was purified by flash column chromatography on silica gel (hexane/DCM) and obtained as a yellowish liquid (64.9 mg, 0.13 mmol, 64 %, dr = 11:1 by GC-MS),  $R_f$  = 0.38 (hexane:DCM = 2:1). **Major diastereomer:**  $^1\text{H}$  NMR (500 MHz,  $\text{CDCl}_3$ ):  $\delta$  5.03 (dq,  $J$  = 12.3, 6.2 Hz, 2H), 2.59 – 2.46 (m, 4H), 2.22 (dd,  $J$  = 13.8, 6.0 Hz, 2H), 2.08 – 1.93 (m, 4H), 1.21 (dd,  $J$  = 6.3, 4.1 Hz, 12H) ppm.  $^{13}\text{C}$  NMR (126 MHz,  $\text{CDCl}_3$ ):  $\delta$  171.9 (d,  $J$  = 69.1 Hz), 119.1 (qt,  $J_{\text{C-F}}$  = 285.5, 36.2 Hz), 115.9 (tq,  $J_{\text{C-F}}$  = 253.2, 37.6 Hz), 69.5 (d,  $J$  = 24.8 Hz), 58.3, 38.7 (d,  $J$  = 2.1 Hz), 35.4, 29.6 (t,  $J_{\text{C-F}}$  = 21.5 Hz), 21.5 (d,  $J$  = 6.8 Hz) ppm.  $^{19}\text{F}$  NMR (471 MHz,  $\text{CDCl}_3$ ):  $\delta$  -86.92 (s, 6F), -118.31 (dddd,  $J$  = 280.5, 266.4, 24.5, 13.2 Hz, 4F) ppm. **HRMS**  $m/z$  (ESI): calcd. for  $\text{C}_{19}\text{H}_{24}\text{F}_{10}\text{O}_4\text{Na}$   $[\text{M}+\text{Na}]^+$  : 529.1407; found: 529.1401.

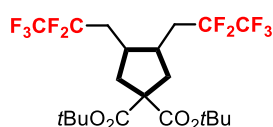

**4d: di-tert-butyl 3,4-bis(2,2,3,3,3-pentafluoropropyl)cyclopentane-1,1-dicarboxylate.** Prepared according to the general procedure. Reaction was run using **3d** (59.3 mg, 0.2 mmol) and  $[\text{CuCF}_2\text{CF}_3]$  (1.0 mL, 0.90 mmol in DMF). The product was purified by flash column chromatography on silica gel (hexane/DCM) and obtained as a yellowish solid (67.0 mg, 0.13 mmol, 63 %, dr = 11:1 by GC-MS),  $R_f$  = 0.48 (hexane:DCM = 2:1). **Major diastereomer:**  $^1\text{H}$  NMR (500 MHz,  $\text{CDCl}_3$ ):  $\delta$  2.56 – 2.48 (m, 2H), 2.42 (dd,  $J$  = 14.1, 6.4 Hz, 2H), 2.16 (dd,  $J$  = 14.2, 6.3 Hz, 2H), 2.05 – 1.91 (m, 4H), 1.44 (d,  $J$  = 4.5 Hz, 18H) ppm.  $^{13}\text{C}$  NMR (126 MHz,  $\text{CDCl}_3$ ):  $\delta$  171.5 (d,  $J$  = 60.7 Hz), 119.1 (qt,  $J_{\text{C-F}}$  = 285.4, 36.2 Hz), 115.9 (tq,  $J_{\text{C-F}}$  = 253.1, 37.6 Hz), 81.9 (d,  $J$  = 19.0 Hz), 59.6, 38.6 (d,  $J$  = 2.1 Hz), 35.4, 29.6 (t,  $J_{\text{C-F}}$  = 21.5 Hz), 27.9 (d,  $J$  = 12.4 Hz) ppm.  $^{19}\text{F}$  NMR (471 MHz,  $\text{CDCl}_3$ ):  $\delta$  -86.94 (s, 6F), -118.32 (dddd,  $J$  = 279.4, 266.2, 23.6, 14.0 Hz, 4F) ppm. **HRMS**  $m/z$  (ESI): calcd. for  $\text{C}_{21}\text{H}_{28}\text{F}_{10}\text{O}_4\text{Na}$   $[\text{M}+\text{Na}]^+$  : 557.1720; found: 557.1712.

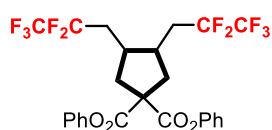

**4e: diphenyl 3,4-bis(2,2,3,3,3-pentafluoropropyl)cyclopentane-1,1-dicarboxylate.** Prepared according to the general procedure. Reaction was run using **3e** (67.3 mg, 0.2 mmol) and  $[\text{CuCF}_2\text{CF}_3]$  (1.0 mL, 0.90 mmol in DMF). The product was purified by flash column chromatography on silica gel (hexane/DCM) and obtained as a yellowish liquid (59.6 mg, 0.10 mmol, 52 %, dr = 11:1 by GC-MS),  $R_f$  = 0.61 (hexane:DCM = 1:1). **Major diastereomer:**  $^1\text{H}$  NMR (500 MHz,  $\text{CDCl}_3$ ):  $\delta$  7.42 (t,  $J$  = 7.7 Hz, 4H), 7.29 (t,  $J$  = 7.4 Hz, 2H), 7.16 – 7.09 (m, 4H), 2.85 (dd,  $J$  = 14.2, 6.4 Hz, 2H), 2.79 – 2.70 (m, 2H), 2.57 (dd,  $J$  = 14.3, 6.4 Hz, 2H), 2.18 – 2.06 (m, 4H) ppm.  $^{13}\text{C}$  NMR (126 MHz,  $\text{CDCl}_3$ ):  $\delta$  170.7 (d,  $J$  = 86.8 Hz), 150.6 (d,  $J$  = 1.9 Hz), 129.9 (d,  $J$  = 3.8 Hz), 126.6 (d,  $J$  = 6.5 Hz), 121.1 (d,  $J$  = 2.8 Hz), 119.1 (qt,  $J_{\text{C-F}}$  = 285.5, 35.8 Hz), 115.8 (tq,  $J_{\text{C-F}}$  = 253.3, 37.7 Hz), 58.4, 38.9 (d,  $J$  = 2.1 Hz), 35.7, 29.6 (t,  $J_{\text{C-F}}$  = 21.5 Hz) ppm.  $^{19}\text{F}$  NMR (471 MHz,  $\text{CDCl}_3$ ):  $\delta$  -86.83 (s, 6F), -118.12

(dddd,  $J = 280.0, 266.7, 23.8, 13.8$  Hz, 4F) ppm. **HRMS**  $m/z$  (ESI): calcd. for  $C_{25}H_{20}F_{10}O_4Na$   $[M+Na]^+$  : 597.1094; found: 597.1092.

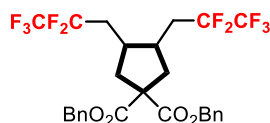

**4f: dibenzyl 3,4-bis(2,2,3,3,3-pentafluoropropyl)cyclopentane-1,1-dicarboxylate.** Prepared according to the general procedure. Reaction was run using **3f** (72.9 mg, 0.2 mmol) and  $[CuCF_2CF_3]$  (1.0 mL, 0.90 mmol in DMF). The product was purified by flash column chromatography on silica gel (hexane/DCM) and obtained as a yellowish liquid (66.1 mg, 0.11 mmol, 55 %, dr = 12:1 by GC-MS),  $R_f = 0.53$  (hexane:DCM = 1:1). **Major diastereomer:**  $^1H$  NMR (500 MHz,  $CDCl_3$ ):  $\delta$  7.31 – 7.27 (m, 6H), 7.23 – 7.18 (m, 4H), 5.09 (d,  $J = 6.0$  Hz, 4H), 2.59 – 2.48 (m, 4H), 2.24 (dd,  $J = 16.3, 8.7$  Hz, 2H), 2.03 – 1.88 (m, 4H) ppm.  $^{13}C$  NMR (126 MHz,  $CDCl_3$ ):  $\delta$  171.9 (d,  $J = 67.7$  Hz), 135.2 (d,  $J = 14.7$  Hz), 128.7 (d,  $J = 1.5$  Hz), 128.6, 128.3 (d,  $J = 11.4$  Hz), 119.1 (qt,  $J_{C-F} = 285.2, 36.0$  Hz), 115.8 (tq,  $J_{C-F} = 253.3, 37.4$  Hz), 67.8 (d,  $J = 14.9$  Hz), 58.4, 38.9, 35.4, 29.6 (t,  $J_{C-F} = 21.4$  Hz) ppm.  $^{19}F$  NMR (471 MHz,  $CDCl_3$ ):  $\delta$  -86.90 (s, 6F), -117.00 – -119.66 (m, 4F) ppm. **HRMS**  $m/z$  (ESI): calcd. for  $C_{27}H_{24}F_{10}O_4Na$   $[M+Na]^+$  : 625.1407; found: 625.1403.

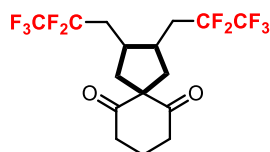

**4g: 2,3-bis(2,2,3,3,3-pentafluoropropyl)spiro[4.5]decane-6,10-dione.** Prepared according to the general procedure. Reaction was run using **3g** (38.5 mg, 0.2 mmol) and  $[CuCF_2CF_3]$  (1.0 mL, 0.90 mmol in DMF). The product was purified by flash column chromatography on silica gel (hexane/EA) and obtained as a white solid (60.1 mg, 0.14 mmol, 70 %, dr > 20:1 by GC-MS),  $R_f = 0.60$  (hexane:EA = 2:1).  $^1H$  NMR (500 MHz,  $CDCl_3$ ):  $\delta$  2.69 (dd,  $J = 14.1, 7.2$  Hz, 4H), 2.60 – 2.52 (m, 2H), 2.29 (dd,  $J = 13.6, 6.1$  Hz, 2H), 2.16 (dd,  $J = 13.7, 6.2$  Hz, 2H), 2.10 – 1.92 (m, 6H) ppm.  $^{13}C$  NMR (126 MHz,  $CDCl_3$ ):  $\delta$  207.9 (d,  $J = 131.3$  Hz), 119.0 (qt,  $J_{C-F} = 285.4, 36.1$  Hz), 115.9 (tq,  $J_{C-F} = 252.8, 37.7$  Hz), 70.2, 37.9, 37.6, 36.8 (d,  $J = 2.2$  Hz), 36.0, 29.3 (t,  $J_{C-F} = 21.5$  Hz), 17.5 ppm.  $^{19}F$  NMR (471 MHz,  $CDCl_3$ ):  $\delta$  -86.93 (s, 6F), -118.21 (dddd,  $J = 276.6, 266.2, 28.5, 8.6$  Hz, 4F) ppm. **HRMS**  $m/z$  (ESI): calcd. for  $C_{16}H_{15}F_{10}O_2$   $[M-H]^-$  : 429.0918; found: 429.0919.

## References

1. Yang, X.; Tsui, G. C. *Org. Lett.* **2020**, *22*, 4562.
2. Chen, W.; Zhang, Y.-L.; Li, H.-J.; Nan, X.; Liu, Y.; Wu, Y.-C. *Synthesis* **2019**, *51*, 3651.
3. Evans, P.; McCabe, T.; Morgan, B. S.; Reau, S. *Org. Lett.* **2005**, *7*, 43.
4. Shainyan, B.A.; Danilevich, Y.S.; Ushakov, I.A. *Russ. J. Org. Chem.* **2016**, 1738.
5. Millet, A.; Baudoin, O. *Org. Lett.* **2014**, *16*, 3998.
6. Fuji, M.; Chiwata, J.; Ozaki, M.; Aratani, S.; Obora, Y. *ACS Omega* **2018**, *3*, 8865.
7. Krompiec, S.; Pigulla, M.; Kuźnik, N.; Krompiec, M.; Marciniak, B.; Chadyniak, D.; Kasperczyk, J. *J. Mol. Catal. A: Chem.* **2005**, *225*, 91.
8. Scalacci, N.; Black, G. W.; Mattedi, G.; Brown, N. L.; Turner, N. J.; Castagnolo, D. *ACS Catal.* **2017**, *7*, 1295.
9. Ho, C.-Y.; He, L. *J. Org. Chem.* **2014**, *79*, 11873.
10. Tappin, N. D. C.; Renaud, P. *Adv. Synth. Catal.* **2021**, *363*, 27.
11. Perch, N. S.; Widenhoefer, R. A. *J. Am. Chem. Soc.* **1999**, *121*, 6960.
12. Gruber, S.; Pregosin, P. S. *Adv. Synth. Catal.* **2009**, *351*, 3235.
13. Zieliński, G. K.; Samojłowicz, C.; Wdowik, T.; Grela, K. *Org. Biomol. Chem.* **2015**, *13*, 2684.
14. Gao, P.; Yan, X.; Tao, T.; Yang, F.; He, T.; Song, X.; Liu, X.; Liang, Y. *Chem. - Eur. J.* **2013**, *19*, 14420.
15. Xu, J.; Qiao, L.; Ying, B.; Zhu, X.; Shen, C.; Zhang, P. *Org. Chem. Front.* **2017**, *4*, 1116.
16. Lishchynskyi, A.; Grushin, V. V. *J. Am. Chem. Soc.* **2013**, *135*, 12584.
17. Yang, B.; Xu, X.-H.; Qing, F.-L. *Org. Lett.* **2015**, *17*, 1906.

## GC Spectra

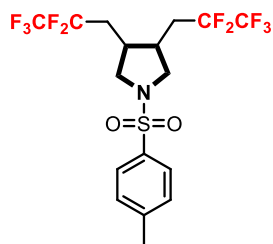

**2a (dr = 4.3:1)**

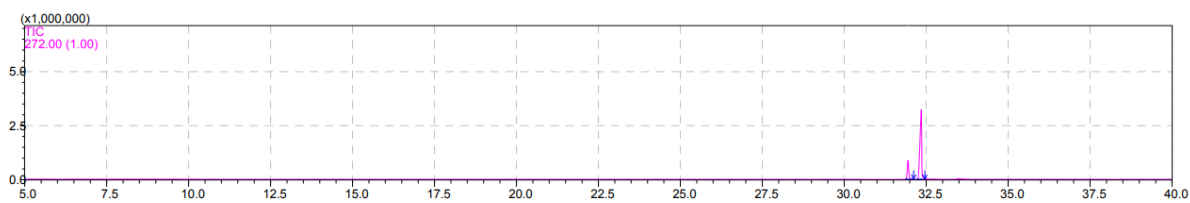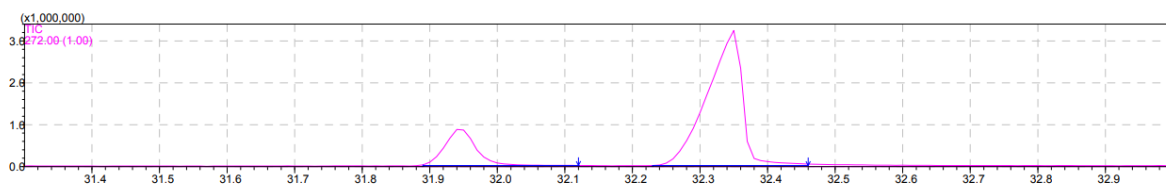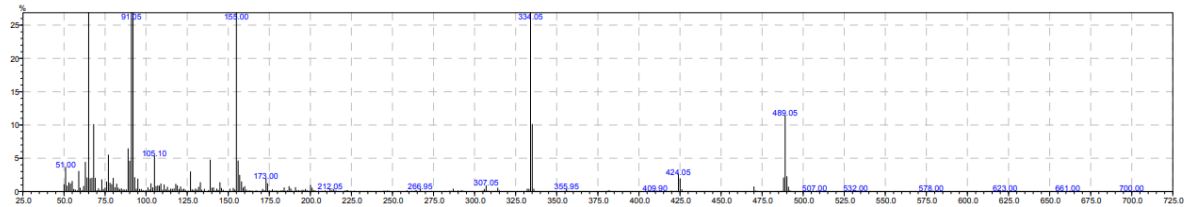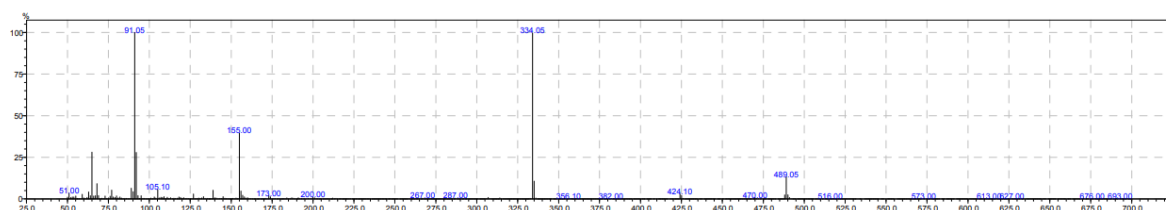

| Peak Report TIC |        |        |        |          |        |         |         |      |      |
|-----------------|--------|--------|--------|----------|--------|---------|---------|------|------|
| Peak#           | R.Time | I.Time | F.Time | Area     | Area%  | Height  | Height% | A/H  | Mark |
| 1               | 31.944 | 31.890 | 32.120 | 2735266  | 19.03  | 861008  | 21.06   | 3.18 | MI   |
| 2               | 32.347 | 32.230 | 32.460 | 11639253 | 80.97  | 3227184 | 78.94   | 3.61 | MI   |
|                 |        |        |        | 14374519 | 100.00 | 4088192 | 100.00  |      |      |

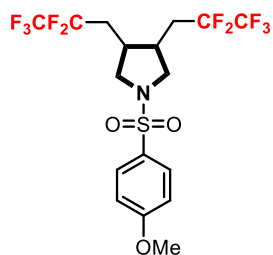

**2b (dr = 142:1)**

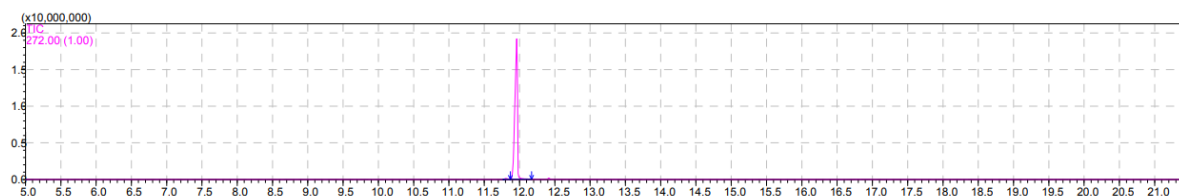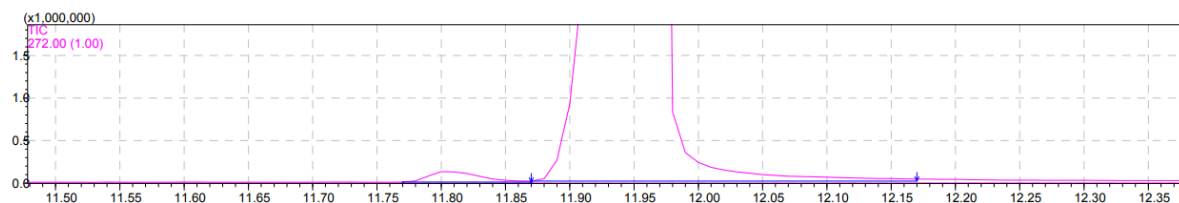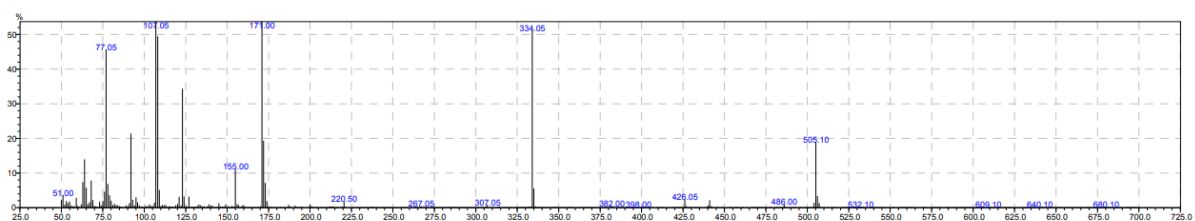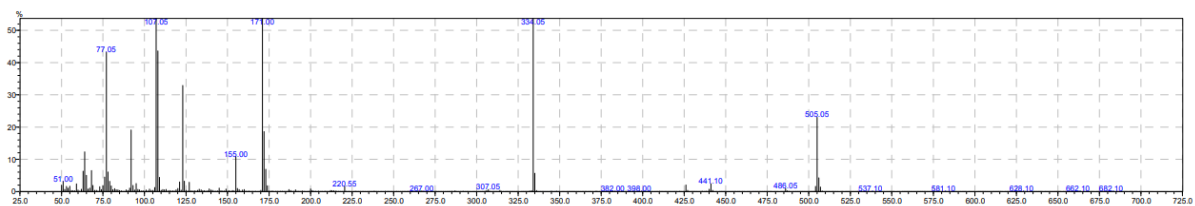

| Peak Report TIC |        |        |        |          |        |          |         |      |      |
|-----------------|--------|--------|--------|----------|--------|----------|---------|------|------|
| Peak#           | R.Time | I.Time | F.Time | Area     | Area%  | Height   | Height% | A/H  | Mark |
| 1               | 11.804 | 11.770 | 11.870 | 347000   | 0.70   | 123873   | 0.64    | 2.80 | MI   |
| 2               | 11.960 | 11.870 | 12.170 | 49133204 | 99.30  | 19168821 | 99.36   | 2.56 | MI   |
|                 |        |        |        | 49480204 | 100.00 | 19292694 | 100.00  |      |      |



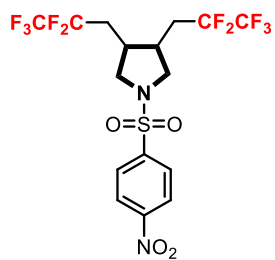

**2c (dr = 1428:1)**

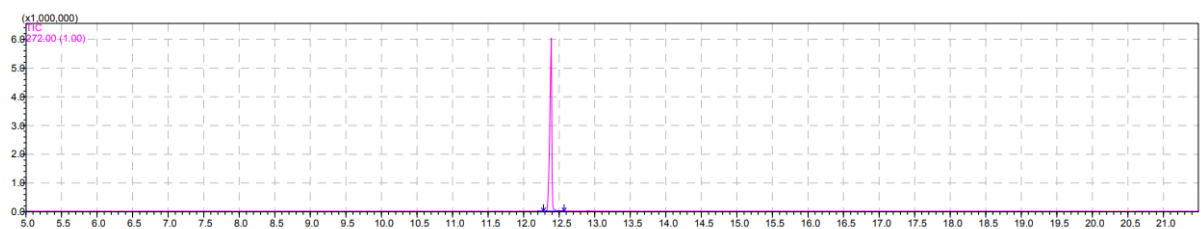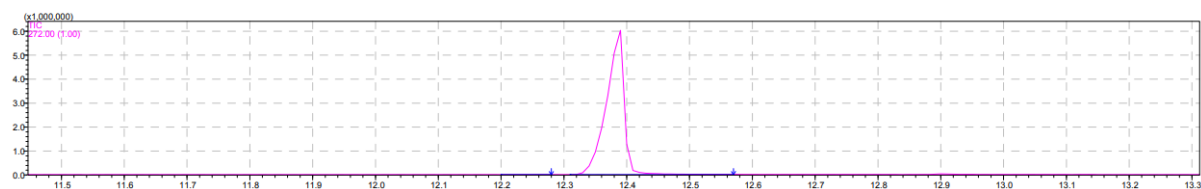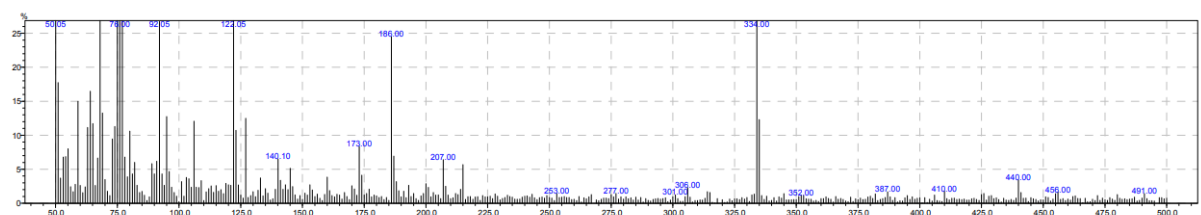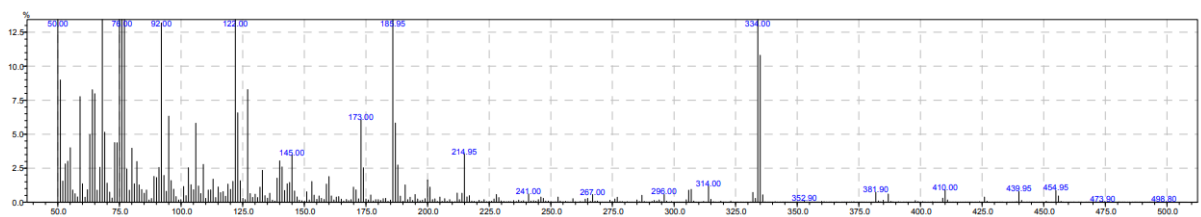

| Peak Report TIC |        |        |        |          |        |         |         |      |      |
|-----------------|--------|--------|--------|----------|--------|---------|---------|------|------|
| Peak#           | R.Time | I.Time | F.Time | Area     | Area%  | Height  | Height% | A/H  | Mark |
| 1               | 12.233 | 12.200 | 12.280 | 8612     | 0.07   | 2620    | 0.04    | 3.29 | MI   |
| 2               | 12.387 | 12.310 | 12.570 | 11784917 | 99.93  | 6028810 | 99.96   | 1.95 | MI   |
|                 |        |        |        | 11793529 | 100.00 | 6031430 | 100.00  |      |      |

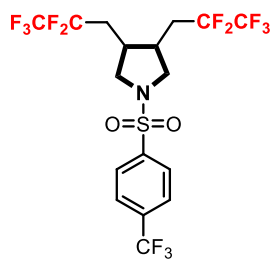

**2d (dr = 97:1)**

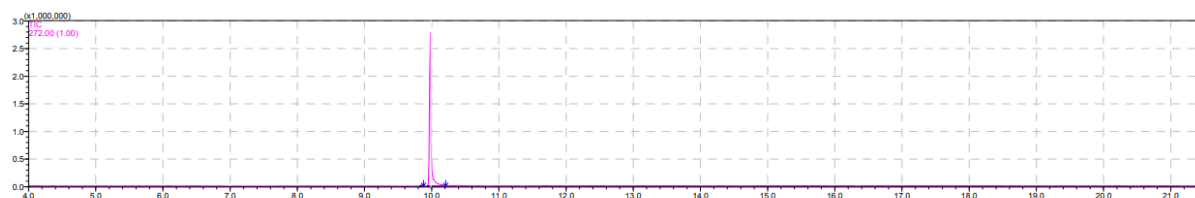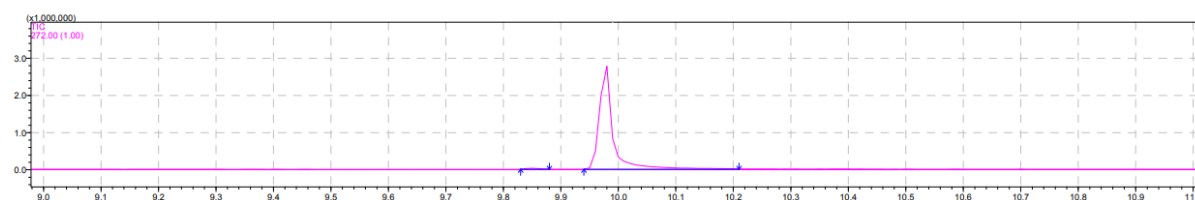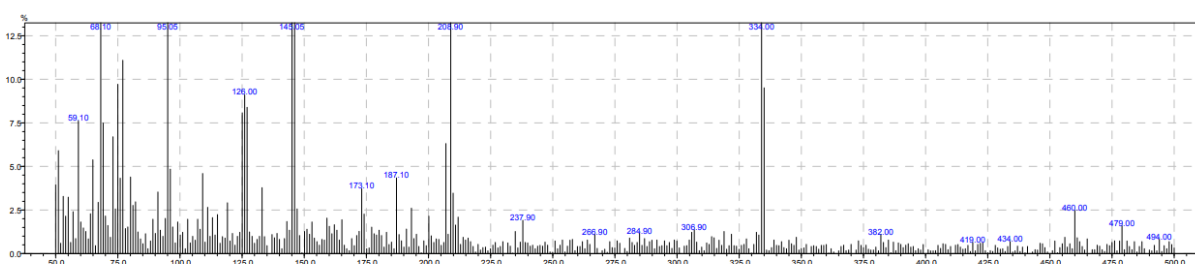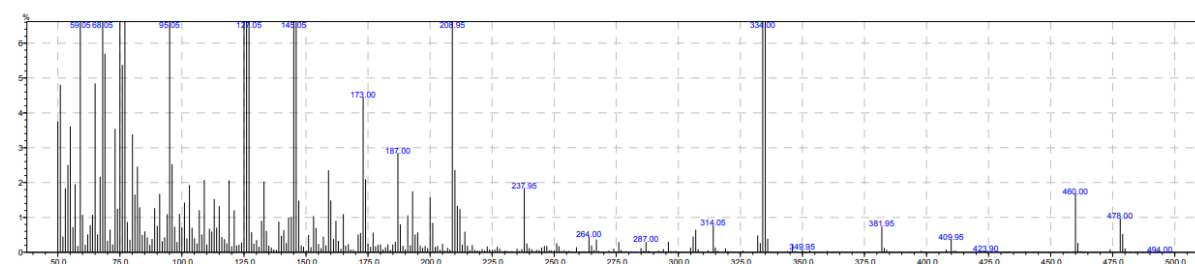

| Peak Report TIC |        |        |        |         |        |         |         |      |      |      |
|-----------------|--------|--------|--------|---------|--------|---------|---------|------|------|------|
| Peak#           | R.Time | I.Time | F.Time | Area    | Area%  | Height  | Height% | A/H  | Mark | Name |
| 1               | 9.851  | 9.830  | 9.880  | 46697   | 1.02   | 28567   | 1.02    | 1.63 | MI   |      |
| 2               | 9.978  | 9.940  | 10.210 | 4543404 | 98.98  | 2773880 | 98.98   | 1.64 | MI   |      |
|                 |        |        |        | 4590101 | 100.00 | 2802447 | 100.00  |      |      |      |

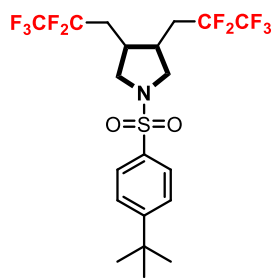

**2e (dr = 4.8:1)**

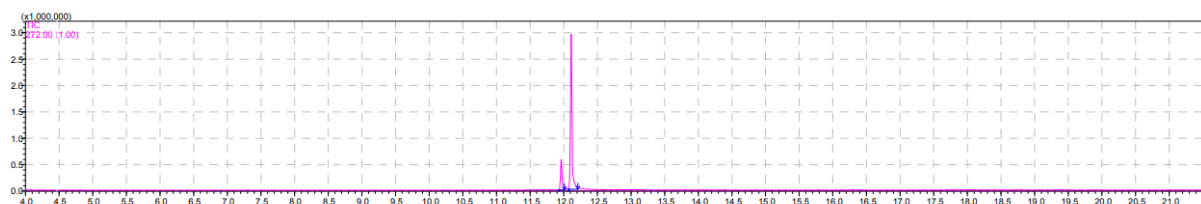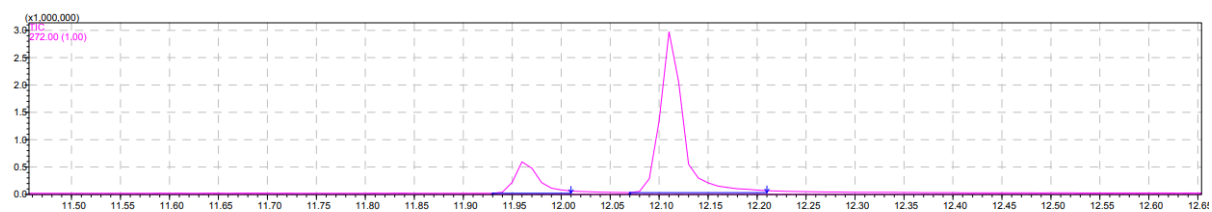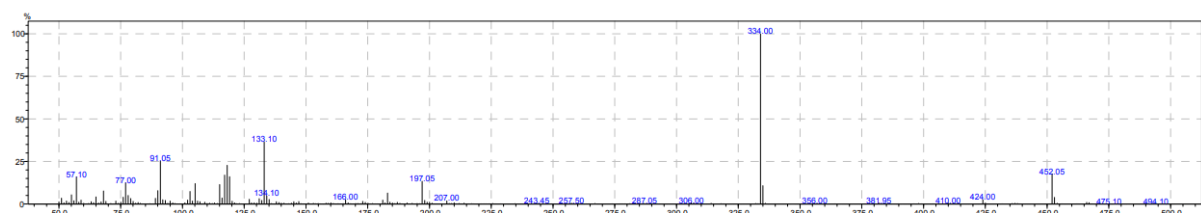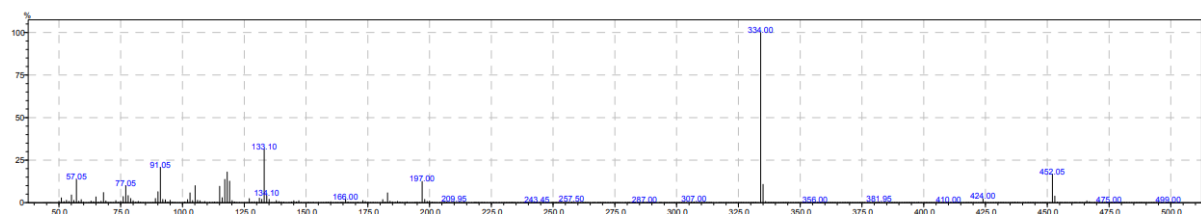

| Peak Report TIC |        |        |        |         |        |         |         |      |           |
|-----------------|--------|--------|--------|---------|--------|---------|---------|------|-----------|
| Peak#           | R.Time | I.Time | F.Time | Area    | Area%  | Height  | Height% | A/H  | Mark Name |
| 1               | 11.963 | 11.930 | 12.010 | 983544  | 17.14  | 574528  | 16.35   | 1.71 | MI        |
| 2               | 12.111 | 12.070 | 12.210 | 4753554 | 82.86  | 2938642 | 83.65   | 1.62 | MI        |
|                 |        |        |        | 5737098 | 100.00 | 3513170 | 100.00  |      |           |

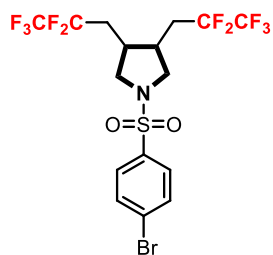

**2f (dr = 63:1)**

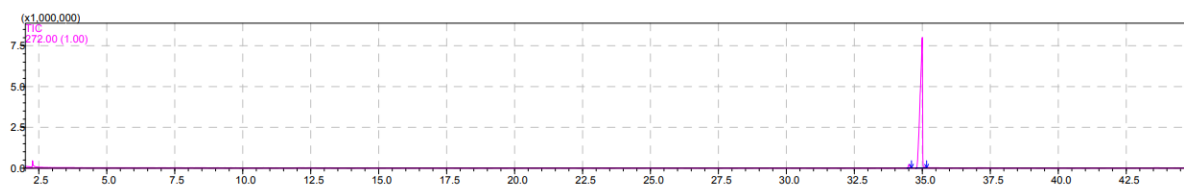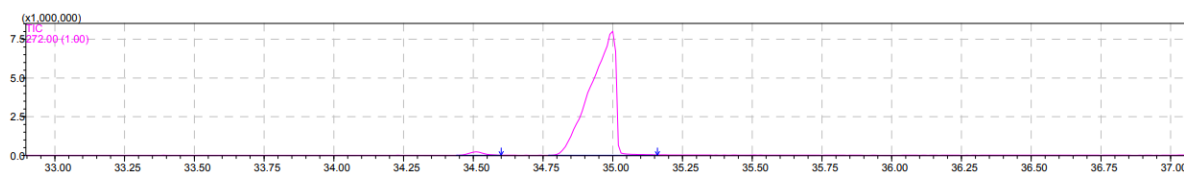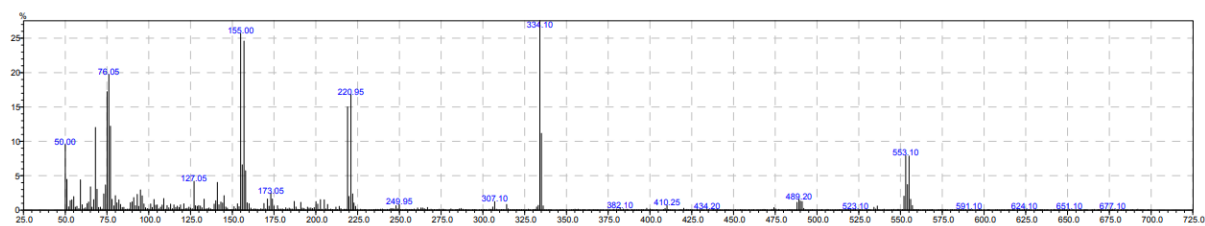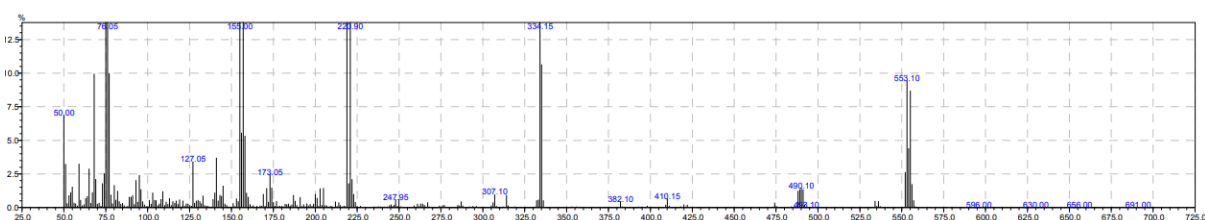

| Peak Report TIC |        |        |        |          |        |         |         |      |      |      |
|-----------------|--------|--------|--------|----------|--------|---------|---------|------|------|------|
| Peak#           | R.Time | I.Time | F.Time | Area     | Area%  | Height  | Height% | A/H  | Mark | Name |
| 1               | 34.510 | 34.440 | 34.600 | 791391   | 1.56   | 220049  | 2.68    | 3.60 | MI   |      |
| 2               | 34.996 | 34.770 | 35.160 | 50095030 | 98.44  | 8004795 | 97.32   | 6.26 | MI   |      |
|                 |        |        |        | 50886421 | 100.00 | 8224844 | 100.00  |      |      |      |

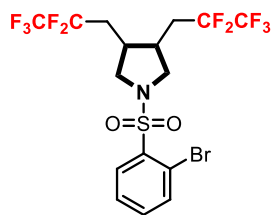

**2g (dr = 4.3:1)**

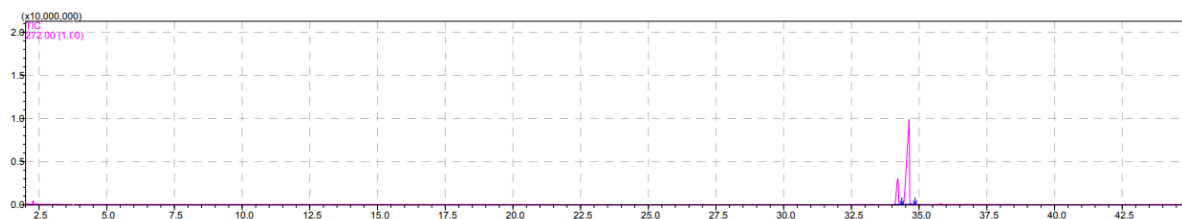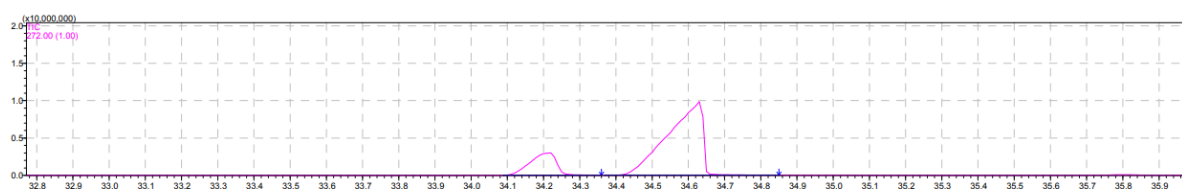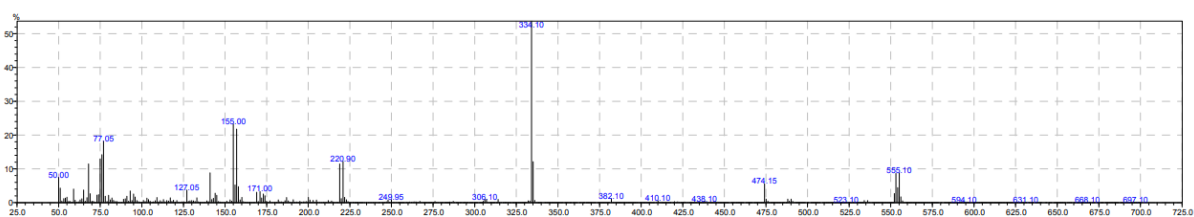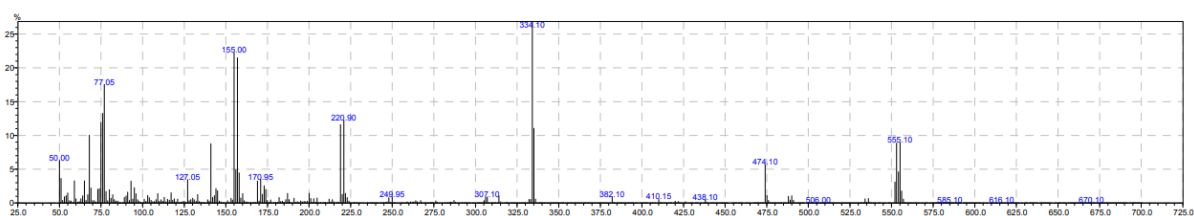

| Peak Report TIC |        |        |        |          |        |          |         |      |      |
|-----------------|--------|--------|--------|----------|--------|----------|---------|------|------|
| Peak#           | R.Time | I.Time | F.Time | Area     | Area%  | Height   | Height% | A/H  | Mark |
| 1               | 34.216 | 34.090 | 34.360 | 15060286 | 18.76  | 2973095  | 23.23   | 5.07 | MI   |
| 2               | 34.627 | 34.370 | 34.850 | 65209642 | 81.24  | 9825703  | 76.77   | 6.64 | MI   |
|                 |        |        |        | 80269928 | 100.00 | 12798798 | 100.00  |      |      |

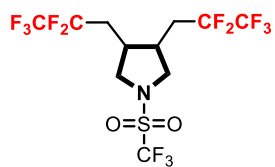

2h (dr = 4.0:1)

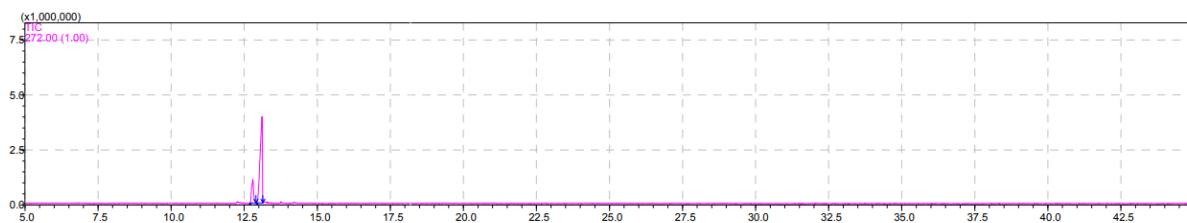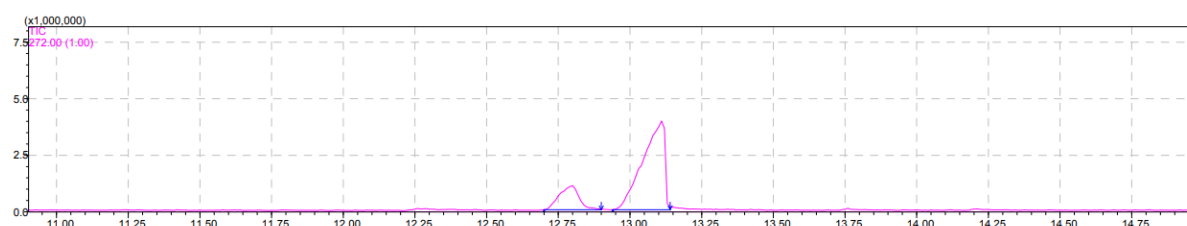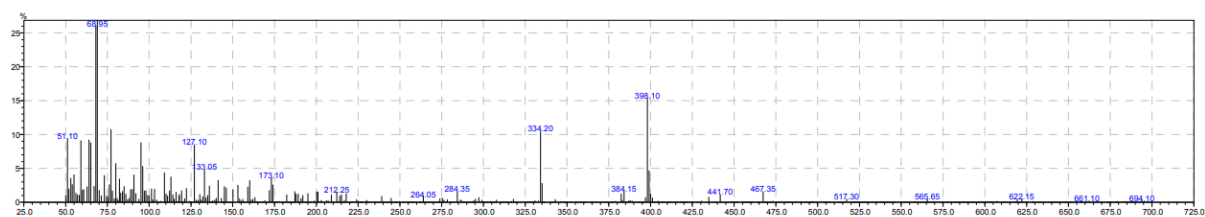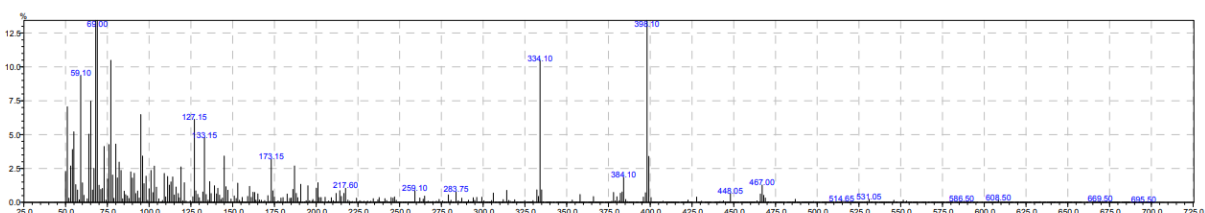

| Peak Report TIC |        |        |        |          |        |         |         |      |      |
|-----------------|--------|--------|--------|----------|--------|---------|---------|------|------|
| Peak#           | R.Time | I.Time | F.Time | Area     | Area%  | Height  | Height% | A/H  | Mark |
| 1               | 12.797 | 12.700 | 12.900 | 5177485  | 19.83  | 1070201 | 21.44   | 4.84 | MI   |
| 2               | 13.109 | 12.940 | 13.140 | 20926857 | 80.17  | 3921196 | 78.56   | 5.34 | MI   |
|                 |        |        |        | 26104342 | 100.00 | 4991397 | 100.00  |      |      |

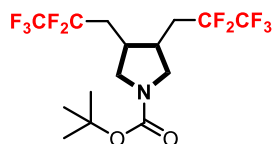

2i (dr = 2.0:1)

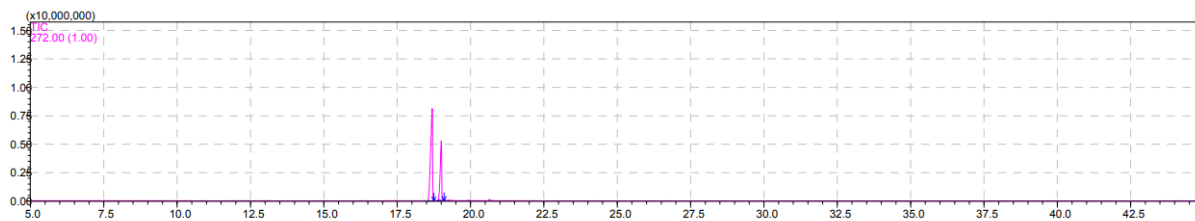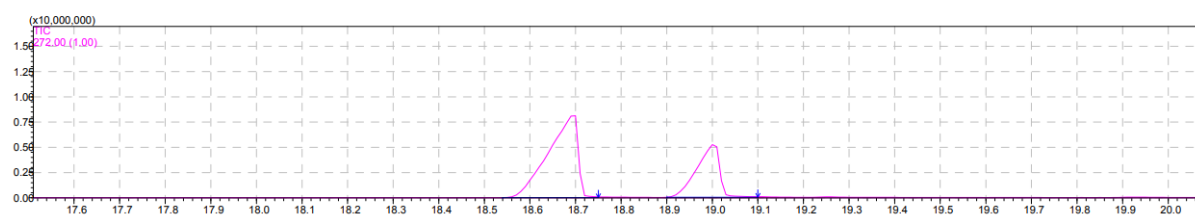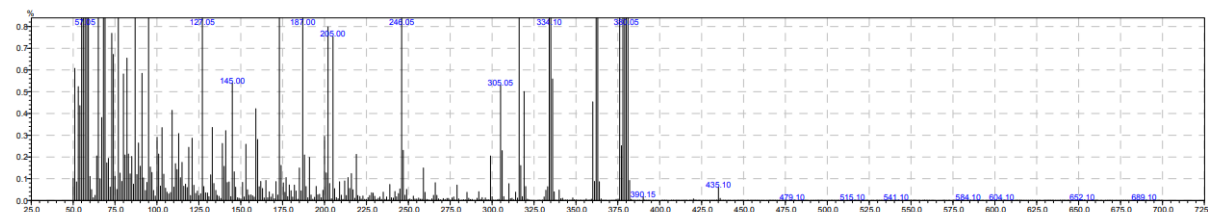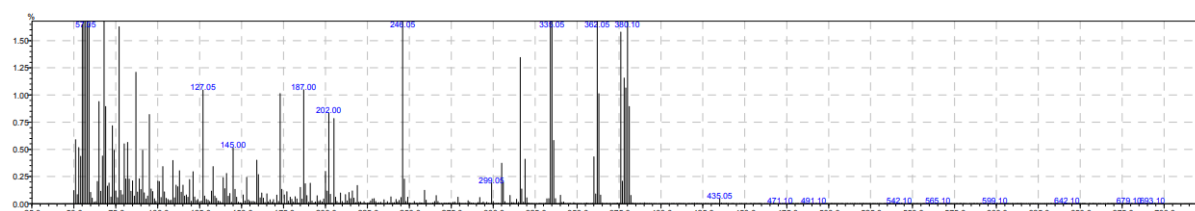

| Peak Report TIC |        |        |        |          |        |          |         |      |      |
|-----------------|--------|--------|--------|----------|--------|----------|---------|------|------|
| Peak#           | R.Time | I.Time | F.Time | Area     | Area%  | Height   | Height% | A/H  | Mark |
| 1               | 18.695 | 18.540 | 18.750 | 36759963 | 66.90  | 8104116  | 60.86   | 4.54 | MI   |
| 2               | 19.002 | 18.900 | 19.100 | 18189786 | 33.10  | 5212832  | 39.14   | 3.49 | MI   |
|                 |        |        |        | 54949749 | 100.00 | 13316948 | 100.00  |      |      |

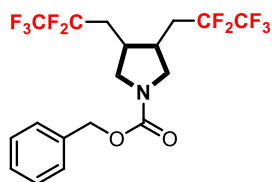

**2j (dr = 2.1:1)**

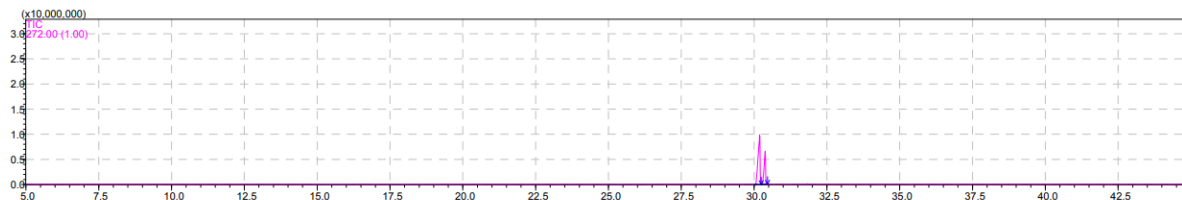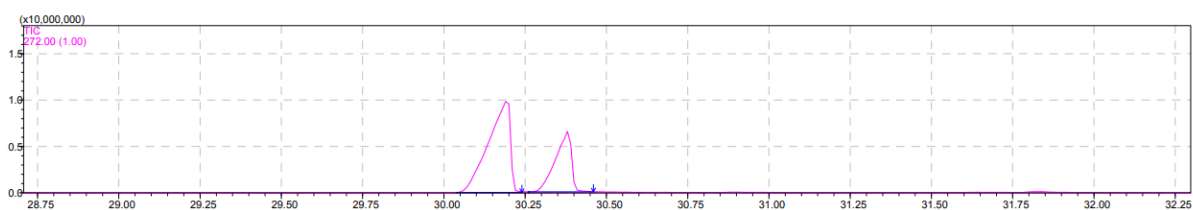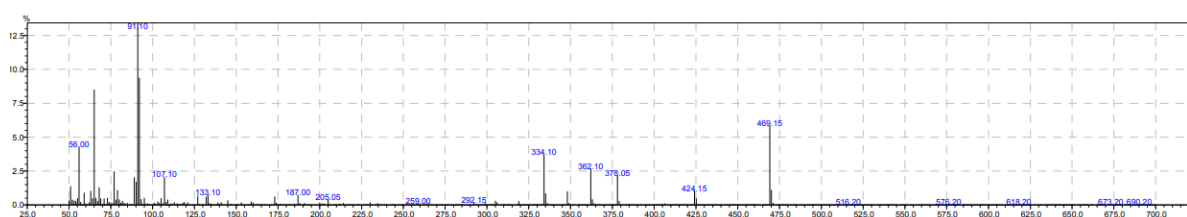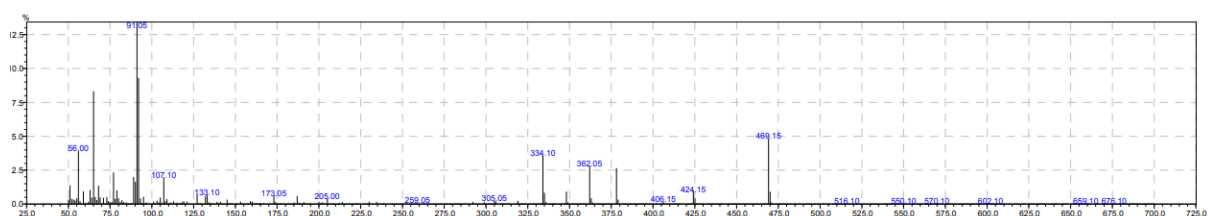

| Peak Report TIC |        |        |        |          |        |          |         |      |      |
|-----------------|--------|--------|--------|----------|--------|----------|---------|------|------|
| Peak#           | R.Time | I.Time | F.Time | Area     | Area%  | Height   | Height% | A/H  | Mark |
| 1               | 30.192 | 30.040 | 30.240 | 46126301 | 67.42  | 9819389  | 60.11   | 4.70 | MI   |
| 2               | 30.379 | 30.260 | 30.460 | 22289603 | 32.58  | 6517047  | 39.89   | 3.42 | MI   |
|                 |        |        |        | 68415904 | 100.00 | 16336436 | 100.00  |      |      |



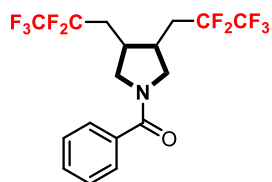

**2k (dr = 2.6:1)**

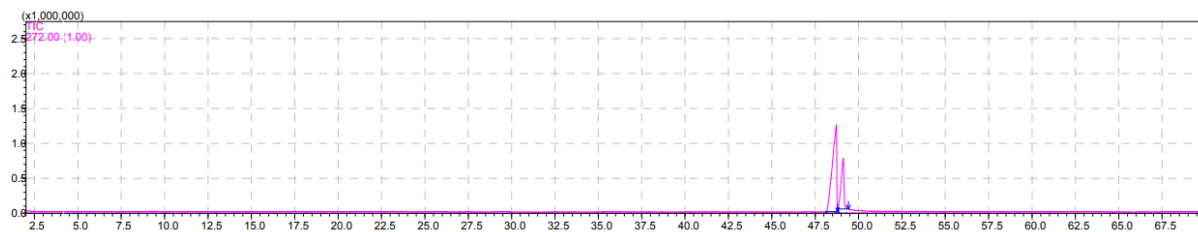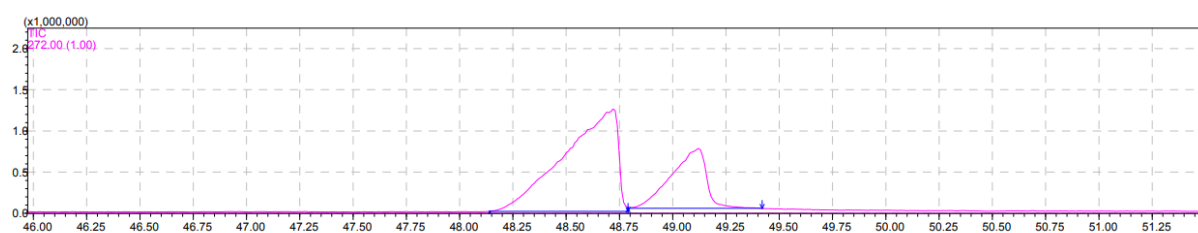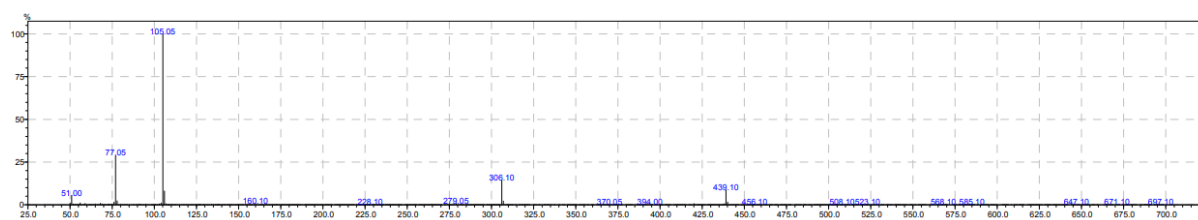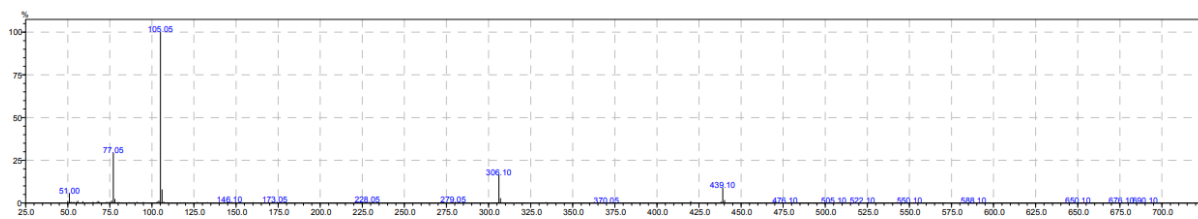

| Peak Report TIC |        |        |        |          |        |         |         |       |           |
|-----------------|--------|--------|--------|----------|--------|---------|---------|-------|-----------|
| Peak#           | R.Time | I.Time | F.Time | Area     | Area%  | Height  | Height% | A/H   | Mark Name |
| 1               | 48.721 | 48.140 | 48.790 | 21664498 | 72.16  | 1242169 | 63.05   | 17.44 | MI        |
| 2               | 49.120 | 48.790 | 49.420 | 8356384  | 27.84  | 728114  | 36.95   | 11.48 | MI        |
|                 |        |        |        | 30020882 | 100.00 | 1970283 | 100.00  |       |           |

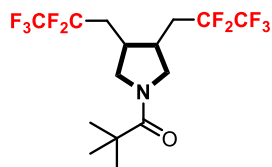

2l (dr = 29:1)

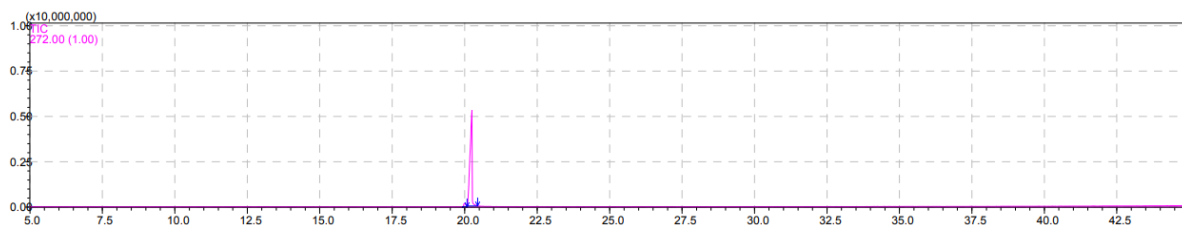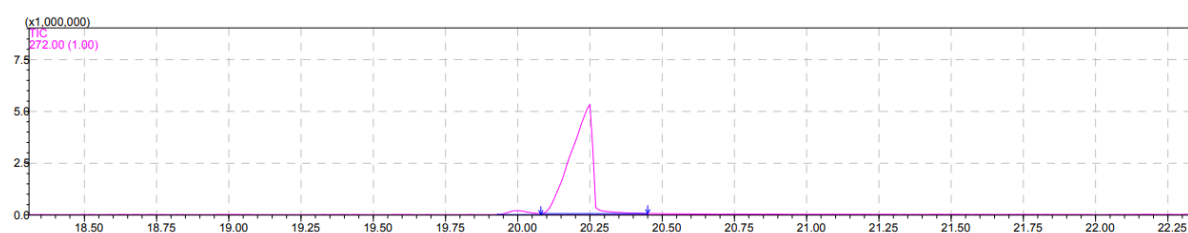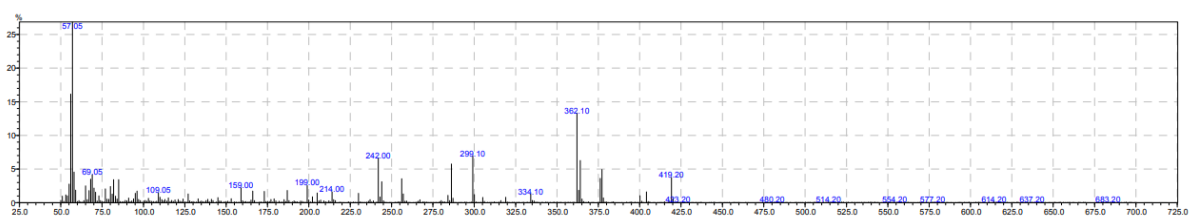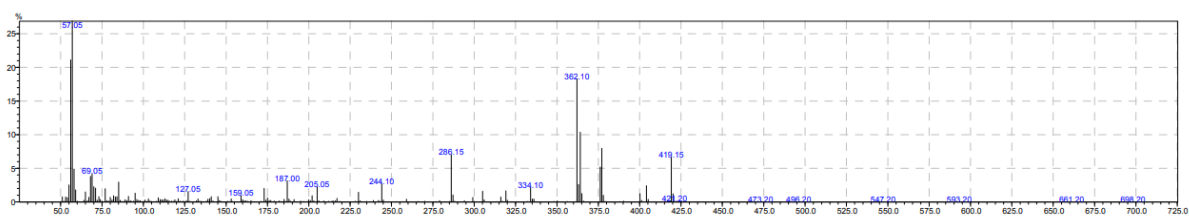

| Peak Report TIC |        |        |        |          |        |         |         |      |      |      |
|-----------------|--------|--------|--------|----------|--------|---------|---------|------|------|------|
| Peak#           | R.Time | I.Time | F.Time | Area     | Area%  | Height  | Height% | A/H  | Mark | Name |
| 1               | 19.997 | 19.930 | 20.080 | 948678   | 3.35   | 186238  | 3.42    | 5.09 | MI   |      |
| 2               | 20.246 | 20.080 | 20.450 | 27394392 | 96.65  | 5265341 | 96.58   | 5.20 | MI   |      |
|                 |        |        |        | 28343070 | 100.00 | 5451579 | 100.00  |      |      |      |

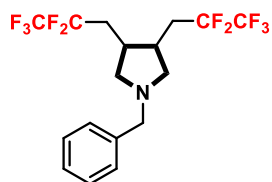

**2m (dr = 2.1:1)**

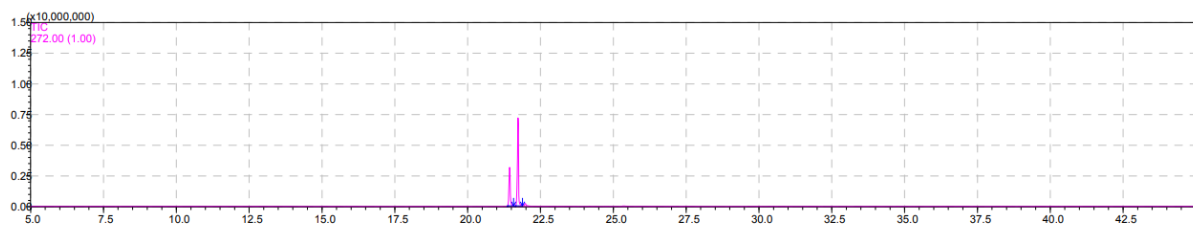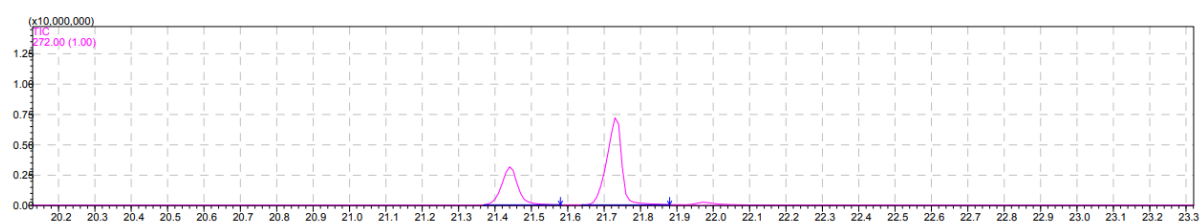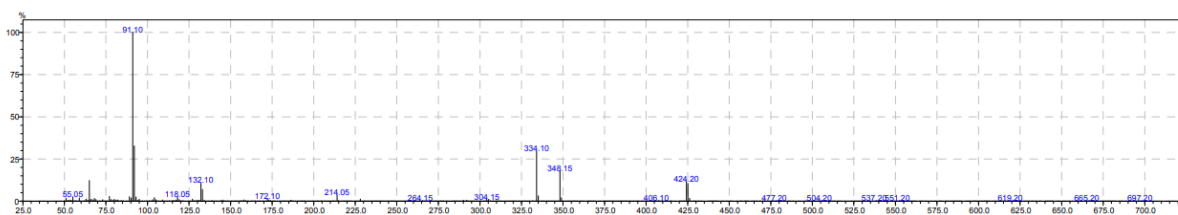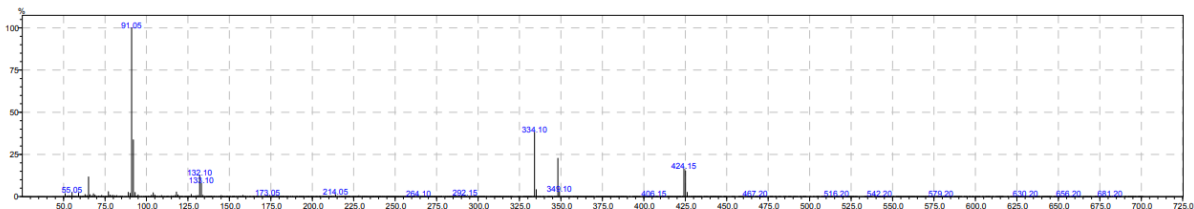

| Peak Report TIC |        |        |        |          |        |          |         |      |      |      |
|-----------------|--------|--------|--------|----------|--------|----------|---------|------|------|------|
| Peak#           | R.Time | I.Time | F.Time | Area     | Area%  | Height   | Height% | A/H  | Mark | Name |
| 1               | 21.441 | 21.370 | 21.580 | 9661622  | 31.97  | 3134965  | 30.42   | 3.08 | MI   |      |
| 2               | 21.732 | 21.640 | 21.880 | 20554932 | 68.03  | 7169192  | 69.58   | 2.87 | MI   |      |
|                 |        |        |        | 30216554 | 100.00 | 10304157 | 100.00  |      |      |      |

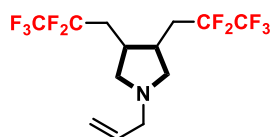

**2n (dr = 26:1)**

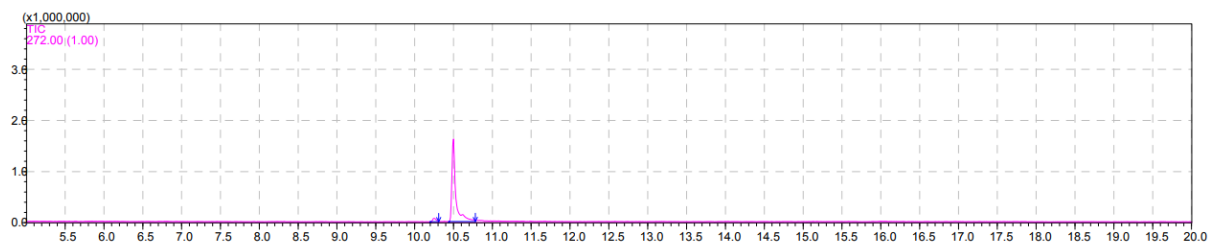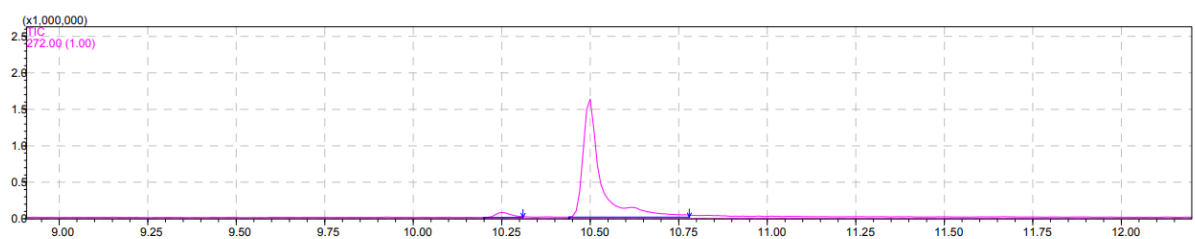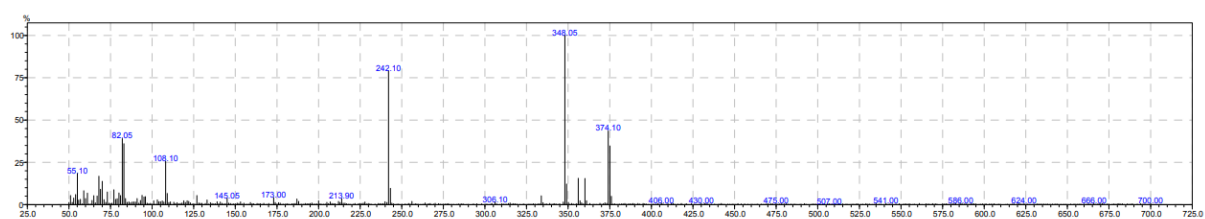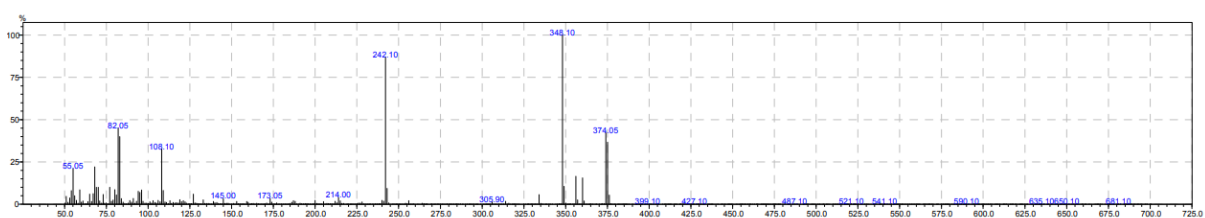

| Peak Report TIC |        |        |        |         |        |         |         |      |      |
|-----------------|--------|--------|--------|---------|--------|---------|---------|------|------|
| Peak#           | R.Time | I.Time | F.Time | Area    | Area%  | Height  | Height% | A/H  | Mark |
| 1               | 10.252 | 10.200 | 10.310 | 216239  | 3.75   | 68712   | 4.08    | 3.15 | MI   |
| 2               | 10.497 | 10.440 | 10.780 | 5553707 | 96.25  | 1614237 | 95.92   | 3.44 | MI   |
|                 |        |        |        | 5769946 | 100.00 | 1682949 | 100.00  |      |      |

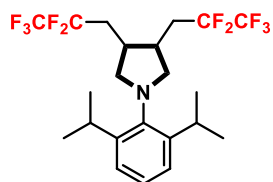

**2o** (dr = 3.4:1)

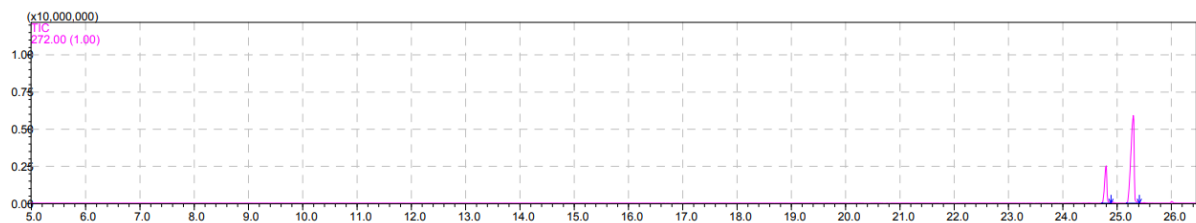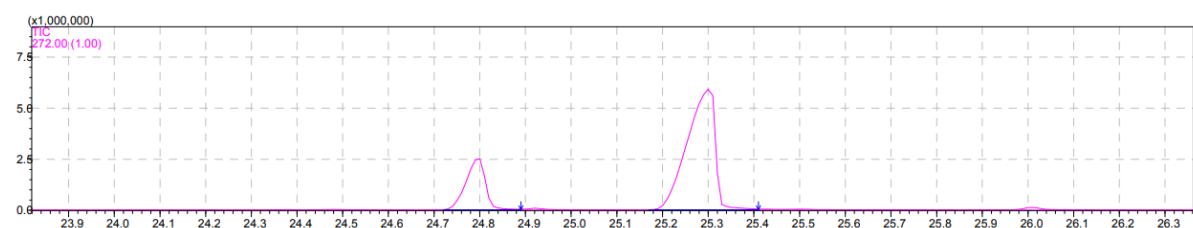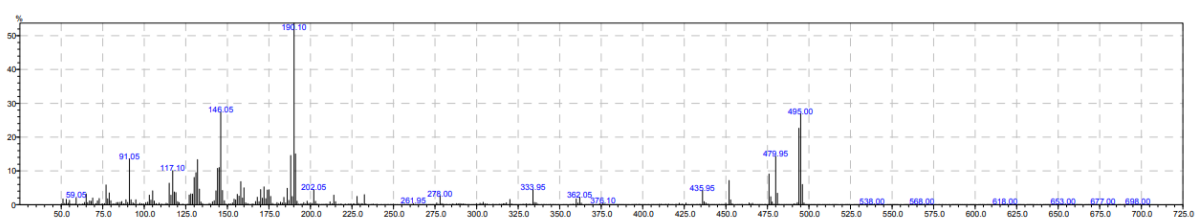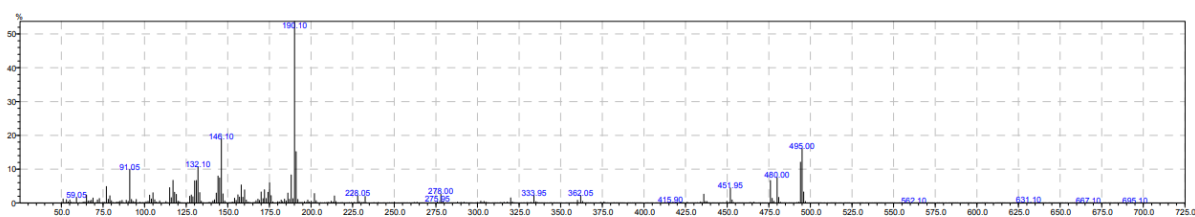

| Peak Report TIC |        |        |        |          |        |         |         |      |      |
|-----------------|--------|--------|--------|----------|--------|---------|---------|------|------|
| Peak#           | R.Time | I.Time | F.Time | Area     | Area%  | Height  | Height% | A/H  | Mark |
| 1               | 24.796 | 24.720 | 24.890 | 7482798  | 22.85  | 2514007 | 29.87   | 2.98 | MI   |
| 2               | 25.299 | 25.170 | 25.410 | 25259670 | 77.15  | 5903031 | 70.13   | 4.28 | MI   |
|                 |        |        |        | 32742468 | 100.00 | 8417038 | 100.00  |      |      |

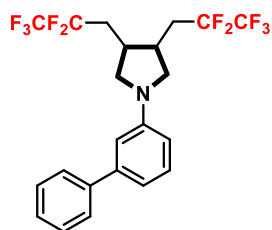

**2p (dr = 2.1:1)**

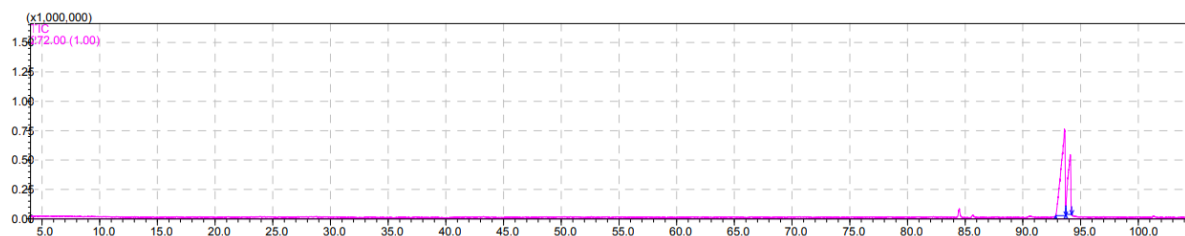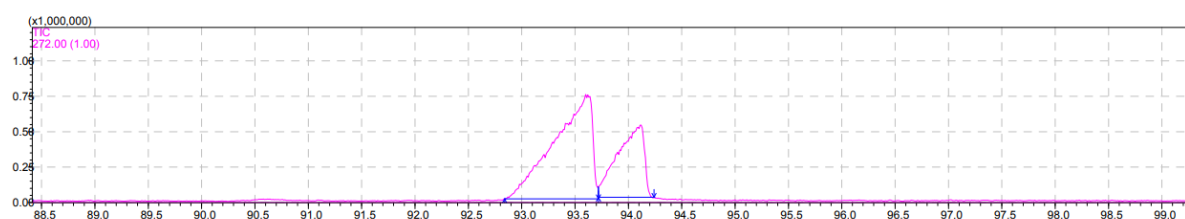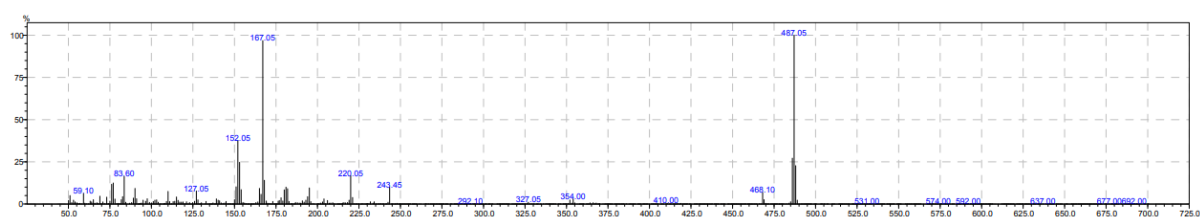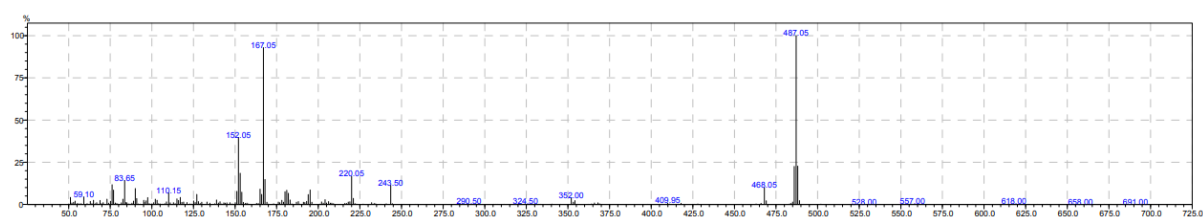

| Peak Report TIC |        |        |        |          |        |         |         |       |      |      |
|-----------------|--------|--------|--------|----------|--------|---------|---------|-------|------|------|
| Peak#           | R.Time | I.Time | F.Time | Area     | Area%  | Height  | Height% | A/H   | Mark | Name |
| 1               | 93.600 | 92.840 | 93.720 | 18172844 | 67.46  | 737236  | 59.10   | 24.65 | MI   |      |
| 2               | 94.116 | 93.720 | 94.240 | 8767486  | 32.54  | 510217  | 40.90   | 17.18 | MI   |      |
|                 |        |        |        | 26940330 | 100.00 | 1247453 | 100.00  |       |      |      |

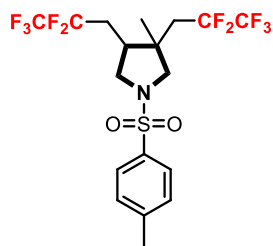

**2r (dr = 1.9:1)**

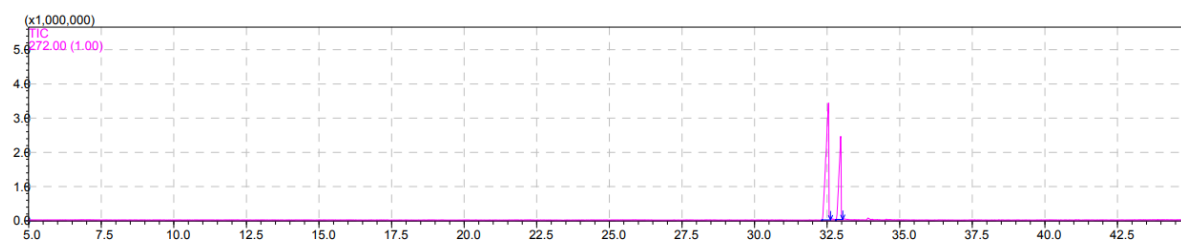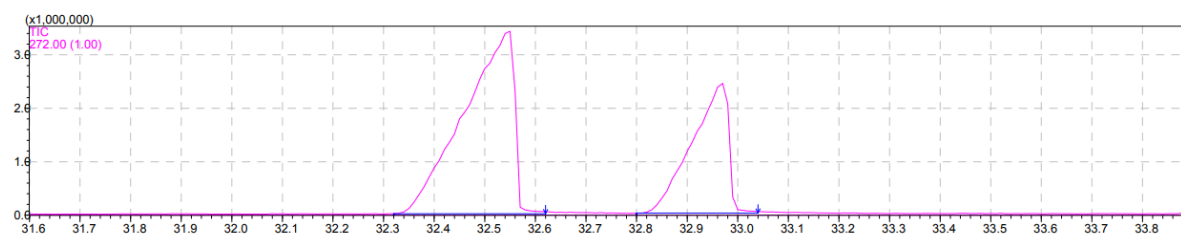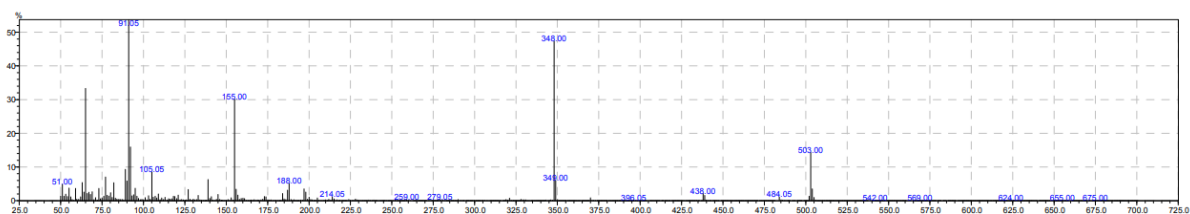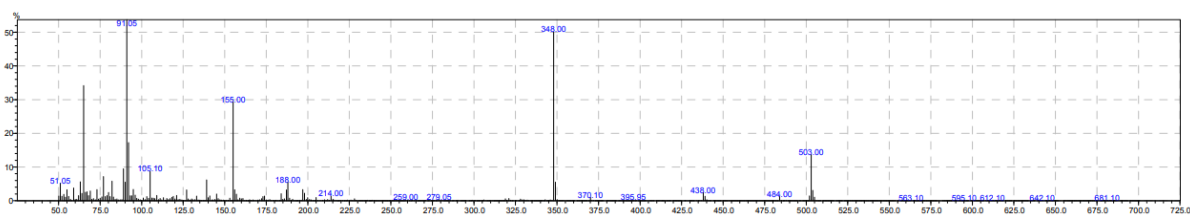

| Peak Report TIC |        |        |        |          |        |         |         |      |      |
|-----------------|--------|--------|--------|----------|--------|---------|---------|------|------|
| Peak#           | R.Time | I.Time | F.Time | Area     | Area%  | Height  | Height% | A/H  | Mark |
| 1               | 32.545 | 32.320 | 32.620 | 23681633 | 65.98  | 3416510 | 58.44   | 6.93 | MI   |
| 2               | 32.967 | 32.800 | 33.040 | 12210605 | 34.02  | 2429899 | 41.56   | 5.03 | MI   |
|                 |        |        |        | 35892238 | 100.00 | 5846409 | 100.00  |      |      |

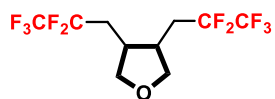

2s (crude dr = 4.2:1)

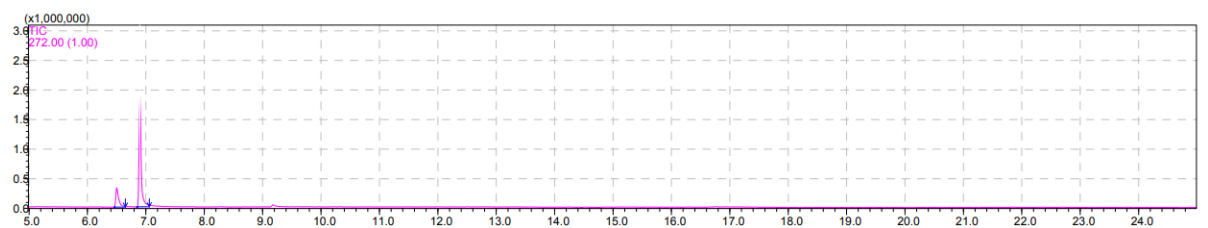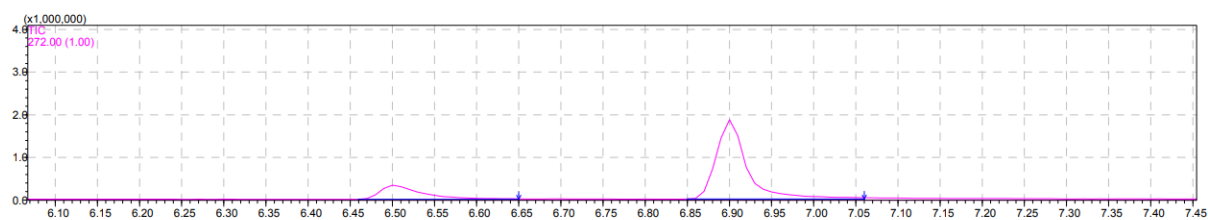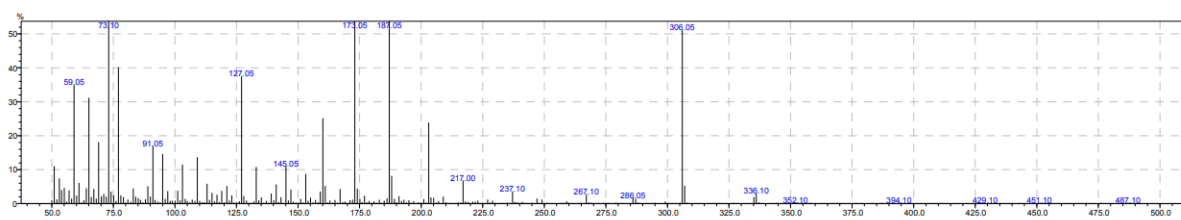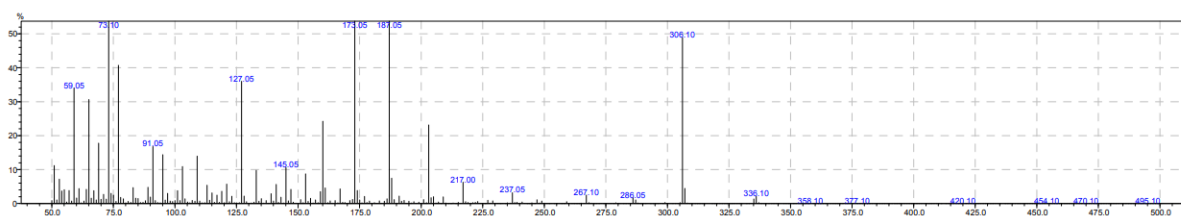

| Peak Report TIC |        |        |        |         |        |         |         |      |      |
|-----------------|--------|--------|--------|---------|--------|---------|---------|------|------|
| Peak#           | R.Time | I.Time | F.Time | Area    | Area%  | Height  | Height% | A/H  | Mark |
| 1               | 6.502  | 6.460  | 6.650  | 1131924 | 19.36  | 328528  | 15.01   | 3.45 | MI   |
| 2               | 6.900  | 6.850  | 7.060  | 4713694 | 80.64  | 1860403 | 84.99   | 2.53 | MI   |
|                 |        |        |        | 5845618 | 100.00 | 2188931 | 100.00  |      |      |



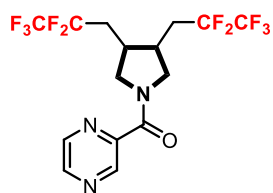

2t (dr = 1.9:1)

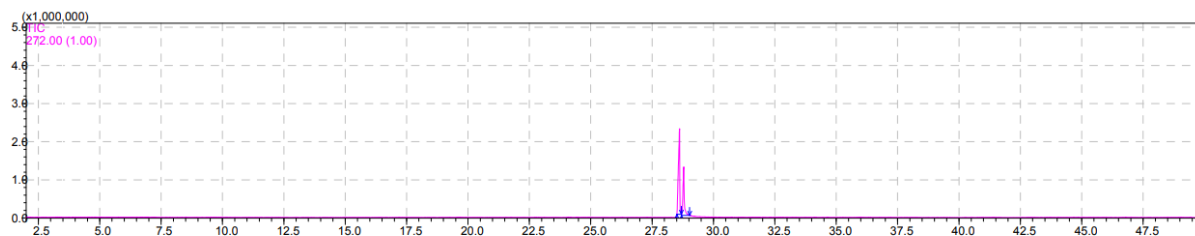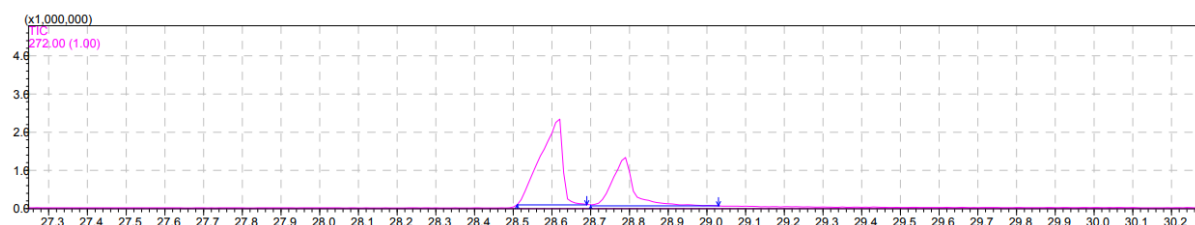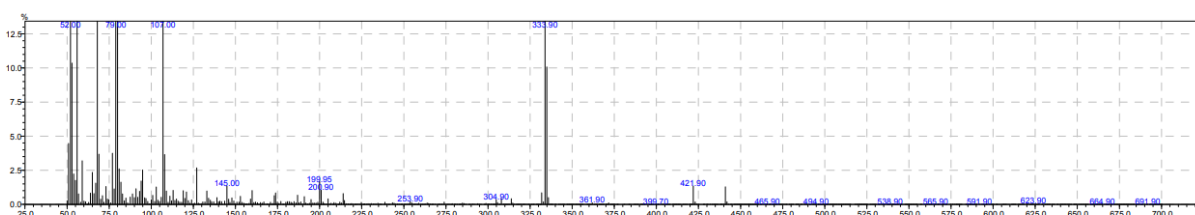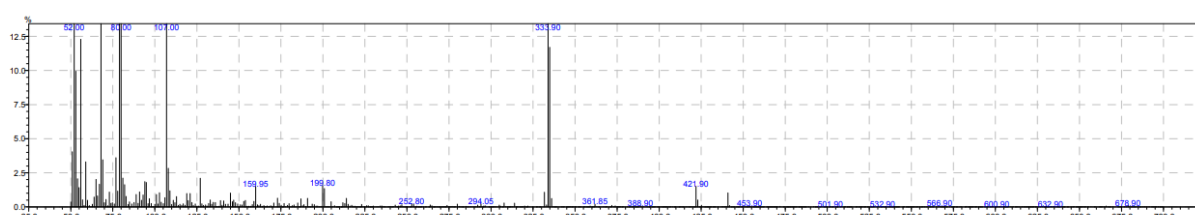

| Peak Report TIC |        |        |        |          |        |         |         |      |      |
|-----------------|--------|--------|--------|----------|--------|---------|---------|------|------|
| Peak#           | R.Time | I.Time | F.Time | Area     | Area%  | Height  | Height% | A/H  | Mark |
| 1               | 28.616 | 28.510 | 28.690 | 8908593  | 65.15  | 2245216 | 63.86   | 3.97 | MI   |
| 2               | 28.787 | 28.700 | 29.030 | 4765967  | 34.85  | 1270506 | 36.14   | 3.75 | MI   |
|                 |        |        |        | 13674560 | 100.00 | 3515722 | 100.00  |      |      |

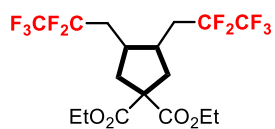

**4a (dr = 11:1)**

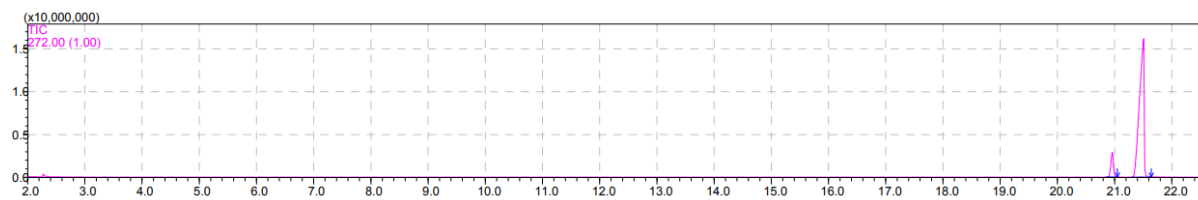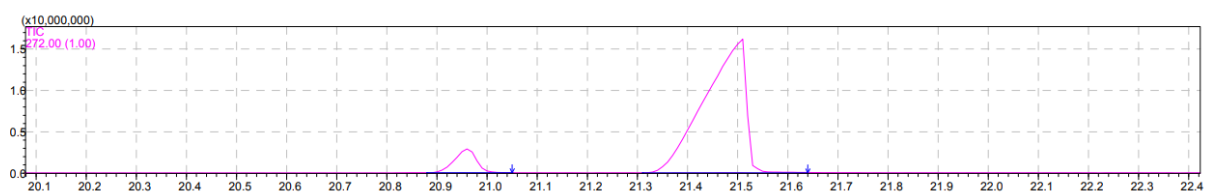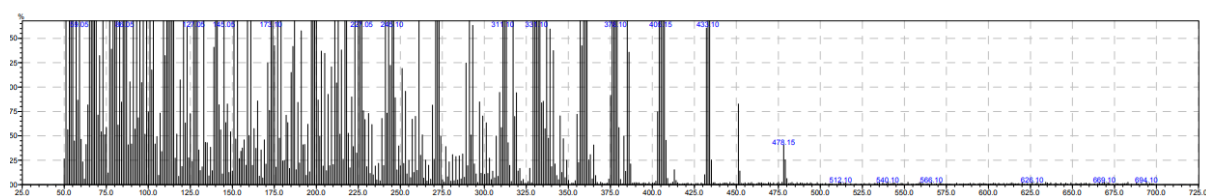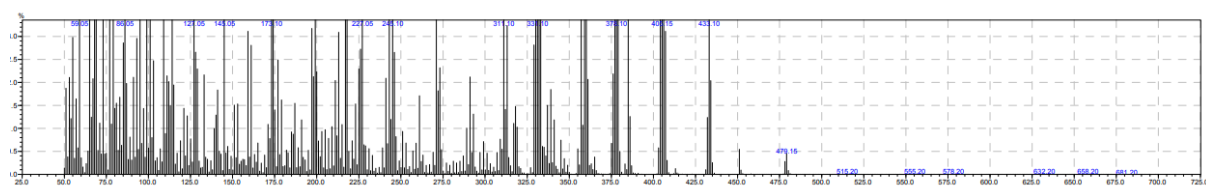

| Peak Report TIC |        |        |        |           |        |          |         |      |      |      |
|-----------------|--------|--------|--------|-----------|--------|----------|---------|------|------|------|
| Peak#           | R.Time | I.Time | F.Time | Area      | Area%  | Height   | Height% | A/H  | Mark | Name |
| 1               | 20.959 | 20.880 | 21.050 | 8759616   | 8.68   | 2877858  | 15.11   | 3.04 | MI   |      |
| 2               | 21.505 | 21.310 | 21.640 | 92181897  | 91.32  | 16170409 | 84.89   | 5.70 | MI   |      |
|                 |        |        |        | 100941513 | 100.00 | 19048267 | 100.00  |      |      |      |

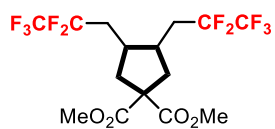

**4b (dr = 10:1)**

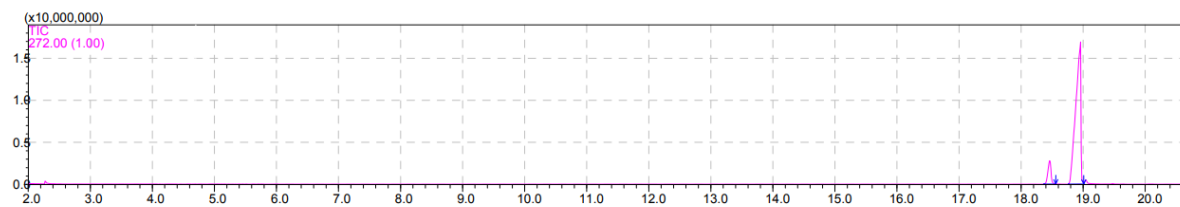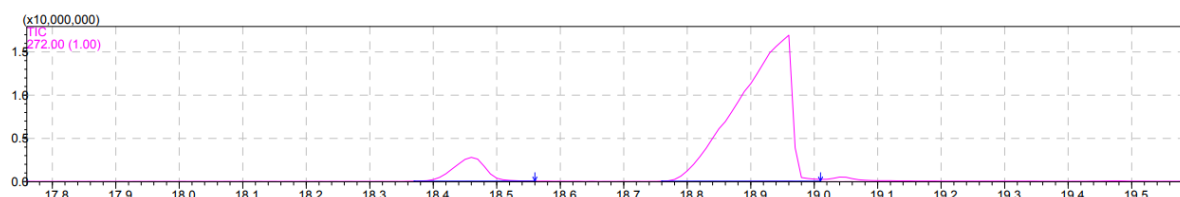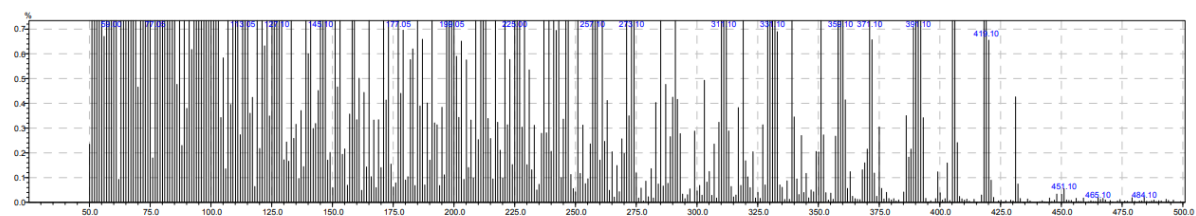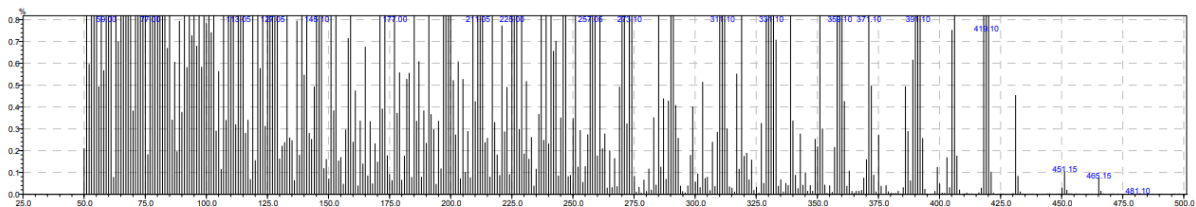

| Peak Report TIC |        |        |        |           |        |          |         |      |           |
|-----------------|--------|--------|--------|-----------|--------|----------|---------|------|-----------|
| Peak#           | R.Time | I.Time | F.Time | Area      | Area%  | Height   | Height% | A/H  | Mark Name |
| 1               | 18.460 | 18.370 | 18.560 | 9681342   | 9.03   | 2770511  | 14.08   | 3.49 | MI        |
| 2               | 18.955 | 18.760 | 19.010 | 97474177  | 90.97  | 16904942 | 85.92   | 5.77 | MI        |
|                 |        |        |        | 107155519 | 100.00 | 19675453 | 100.00  |      |           |

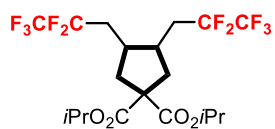

**4c (dr = 11:1)**

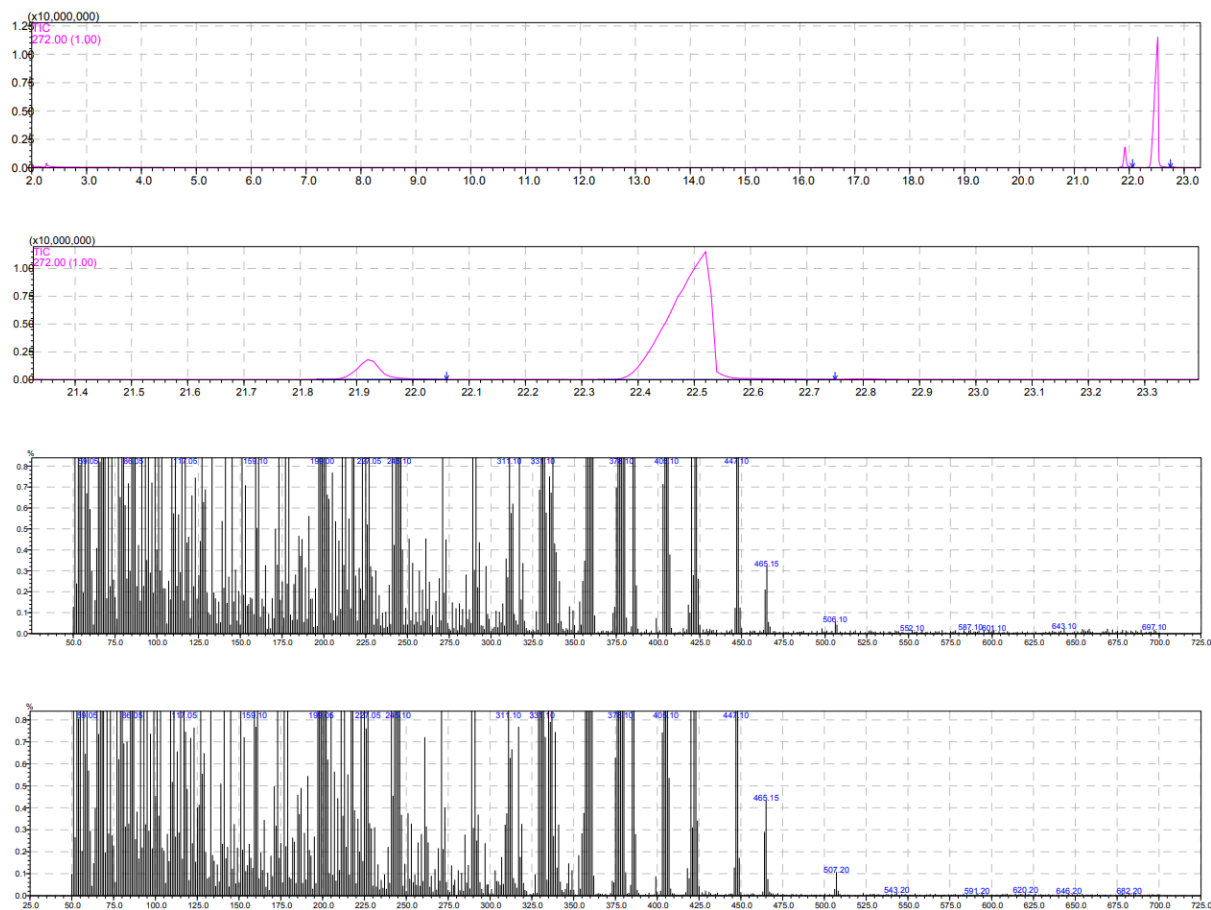

| Peak Report TIC |        |        |        |          |        |          |         |      |      |
|-----------------|--------|--------|--------|----------|--------|----------|---------|------|------|
| Peak#           | R.Time | I.Time | F.Time | Area     | Area%  | Height   | Height% | A/H  | Mark |
| 1               | 21.922 | 21.830 | 22.060 | 5231474  | 8.60   | 1774502  | 13.38   | 2.95 | MI   |
| 2               | 22.517 | 22.330 | 22.750 | 55599047 | 91.40  | 11484663 | 86.62   | 4.84 | MI   |
|                 |        |        |        | 60830521 | 100.00 | 13259165 | 100.00  |      |      |

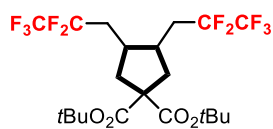

**4d (dr = 11:1)**

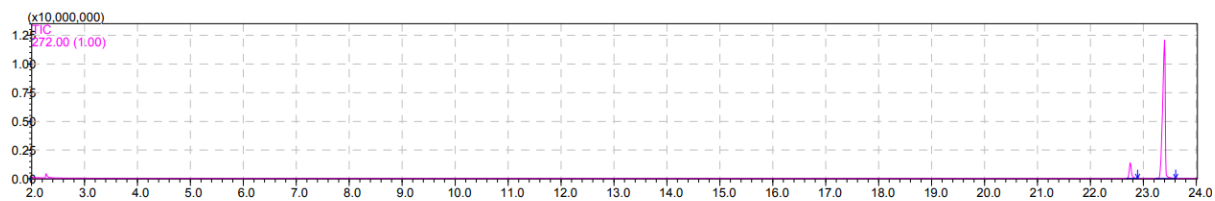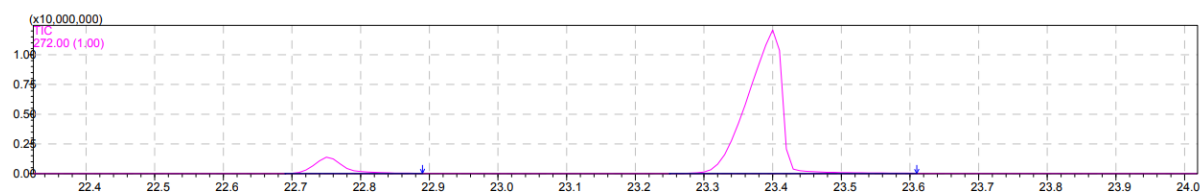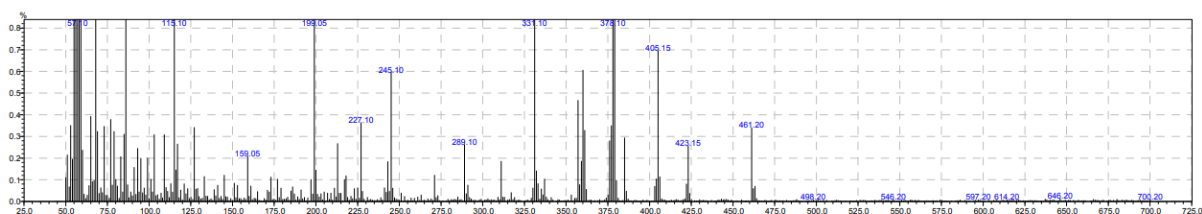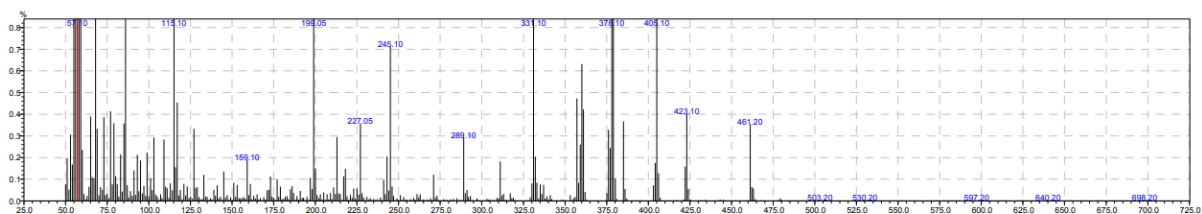

| Peak Report TIC |        |        |        |          |        |          |         |      |           |
|-----------------|--------|--------|--------|----------|--------|----------|---------|------|-----------|
| Peak#           | R.Time | I.Time | F.Time | Area     | Area%  | Height   | Height% | A/H  | Mark Name |
| 1               | 22.752 | 22.690 | 22.890 | 3960767  | 8.69   | 1362739  | 10.15   | 2.91 | MI        |
| 2               | 23.399 | 23.250 | 23.610 | 41614588 | 91.31  | 12059018 | 89.85   | 3.45 | MI        |
|                 |        |        |        | 45575355 | 100.00 | 13421757 | 100.00  |      |           |

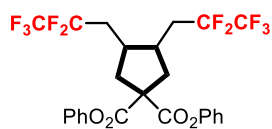

**4e (dr = 11:1)**

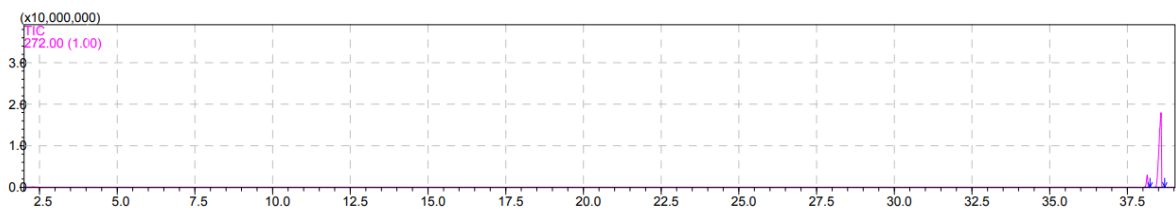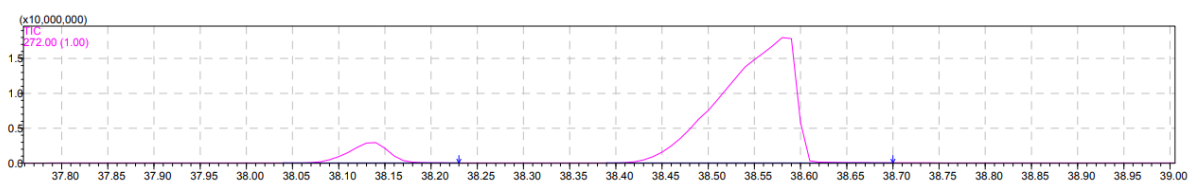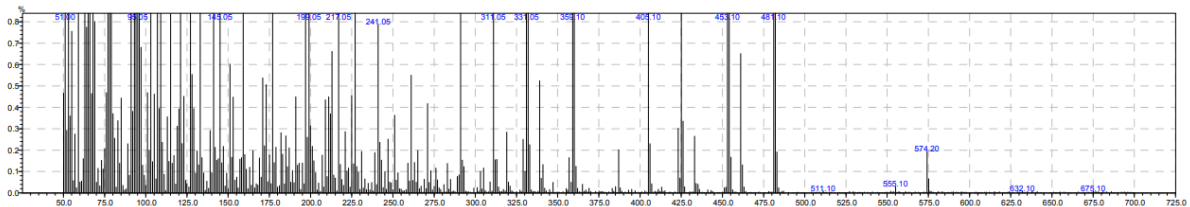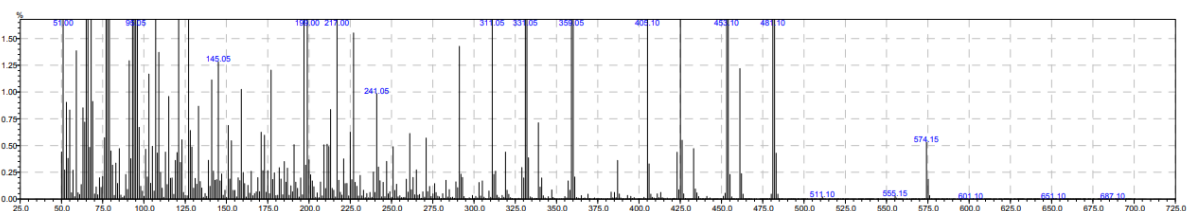

| Peak Report TIC |        |        |        |           |        |          |         |      |      |
|-----------------|--------|--------|--------|-----------|--------|----------|---------|------|------|
| Peak#           | R.Time | I.Time | F.Time | Area      | Area%  | Height   | Height% | A/H  | Mark |
| 1               | 38.136 | 38.040 | 38.230 | 8971546   | 8.39   | 2935055  | 14.06   | 3.06 | MI   |
| 2               | 38.584 | 38.390 | 38.700 | 97919713  | 91.61  | 17943338 | 85.94   | 5.46 | MI   |
|                 |        |        |        | 106891259 | 100.00 | 20878393 | 100.00  |      |      |

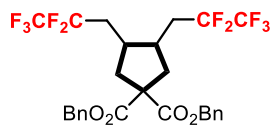

4f (dr = 12:1)

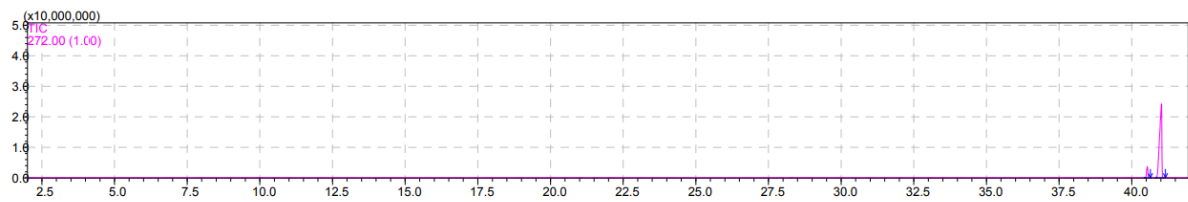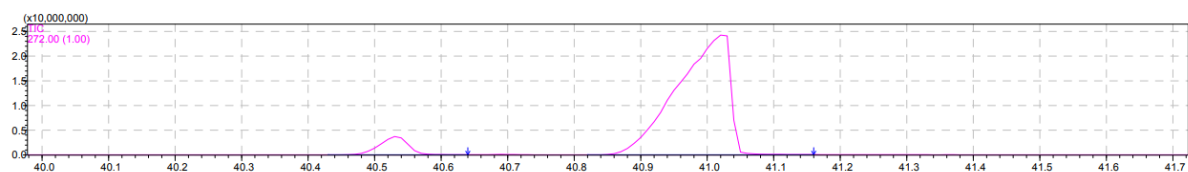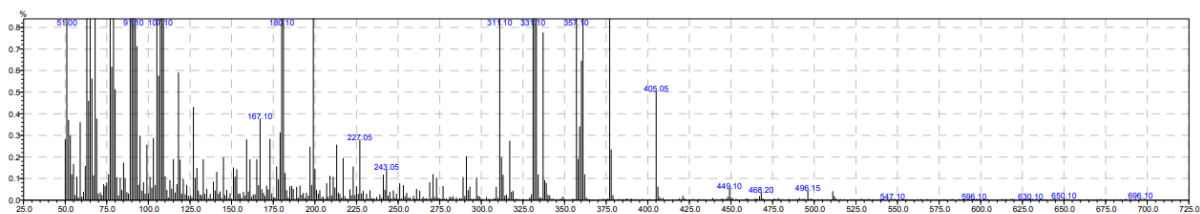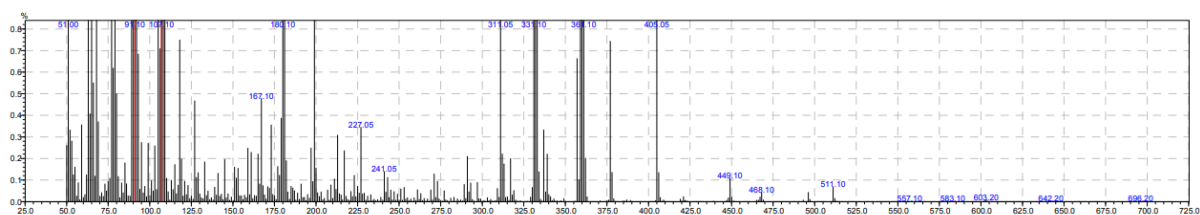

| Peak Report TIC |        |        |        |           |        |          |         |      |      |
|-----------------|--------|--------|--------|-----------|--------|----------|---------|------|------|
| Peak#           | R.Time | I.Time | F.Time | Area      | Area%  | Height   | Height% | A/H  | Mark |
| 1               | 40.532 | 40.430 | 40.640 | 11087894  | 7.65   | 3692227  | 13.23   | 3.00 | MI   |
| 2               | 41.024 | 40.820 | 41.160 | 133784060 | 92.35  | 24220355 | 86.77   | 5.52 | MI   |
|                 |        |        |        | 144871954 | 100.00 | 27912582 | 100.00  |      |      |

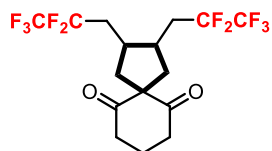

**4g (dr = 416:1)**

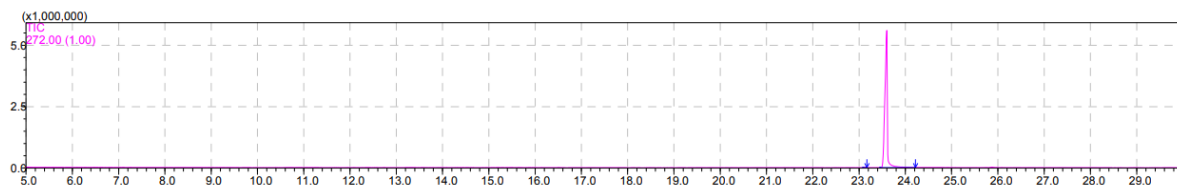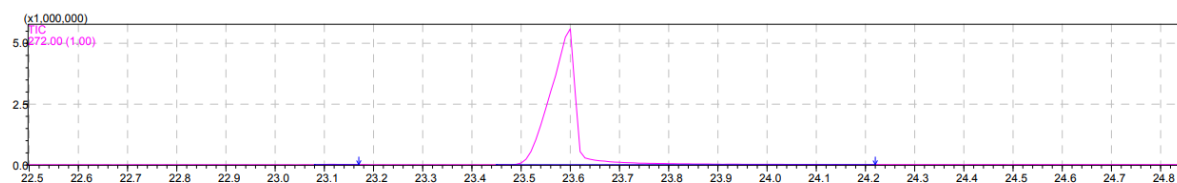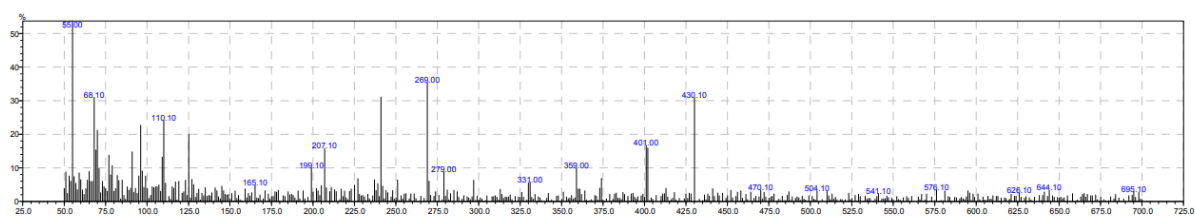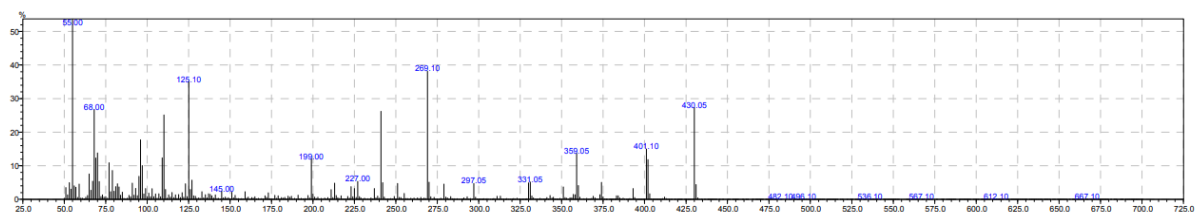

| Peak Report TIC |        |        |        |          |        |         |         |      |      |      |
|-----------------|--------|--------|--------|----------|--------|---------|---------|------|------|------|
| Peak#           | R.Time | I.Time | F.Time | Area     | Area%  | Height  | Height% | A/H  | Mark | Name |
| 1               | 23.117 | 23.080 | 23.170 | 48053    | 0.24   | 17680   | 0.32    | 2.72 | MI   |      |
| 2               | 23.596 | 23.450 | 24.220 | 20377025 | 99.76  | 5587142 | 99.68   | 3.65 | MI   |      |
|                 |        |        |        | 20425078 | 100.00 | 5604822 | 100.00  |      |      |      |



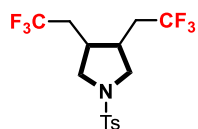

10 (crude)

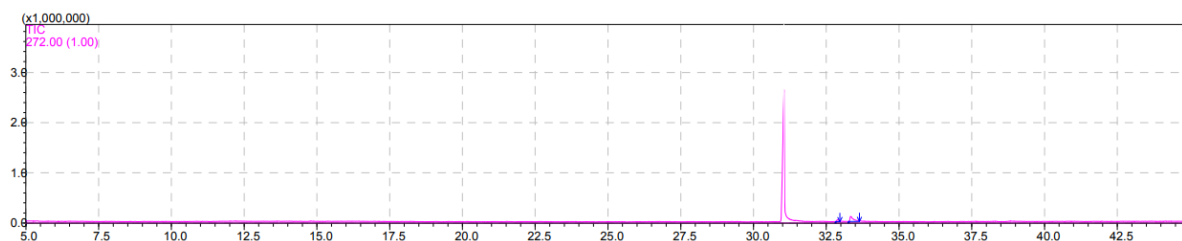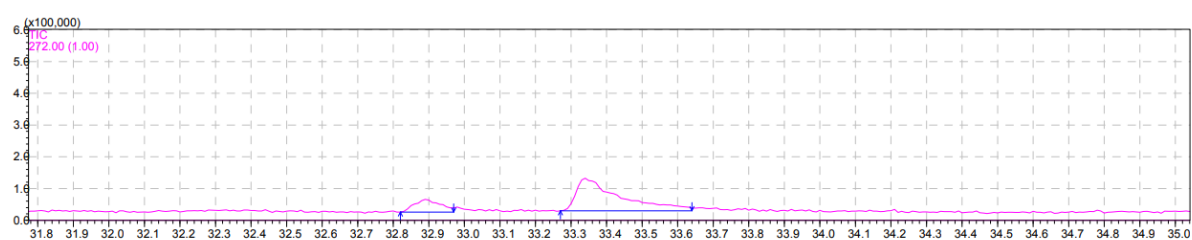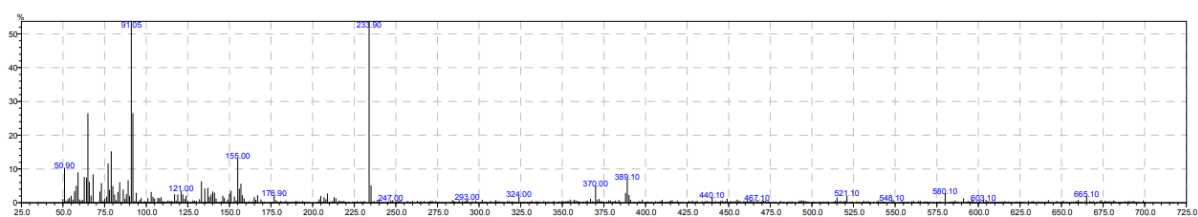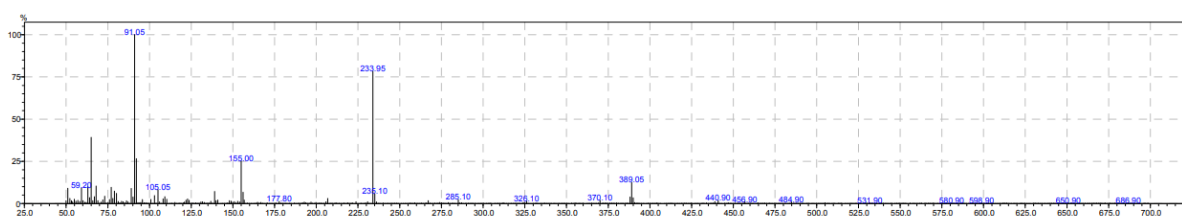

| Peak Report TIC |        |        |        |         |        |        |         |      |      |      |
|-----------------|--------|--------|--------|---------|--------|--------|---------|------|------|------|
| Peak#           | R.Time | I.Time | F.Time | Area    | Area%  | Height | Height% | A/H  | Mark | Name |
| 1               | 32.891 | 32.820 | 32.970 | 208426  | 19.23  | 39865  | 28.01   | 5.23 | MI   |      |
| 2               | 33.339 | 33.270 | 33.640 | 875590  | 80.77  | 102457 | 71.99   | 8.55 | MI   |      |
|                 |        |        |        | 1084016 | 100.00 | 142322 | 100.00  |      |      |      |

## NMR Spectra

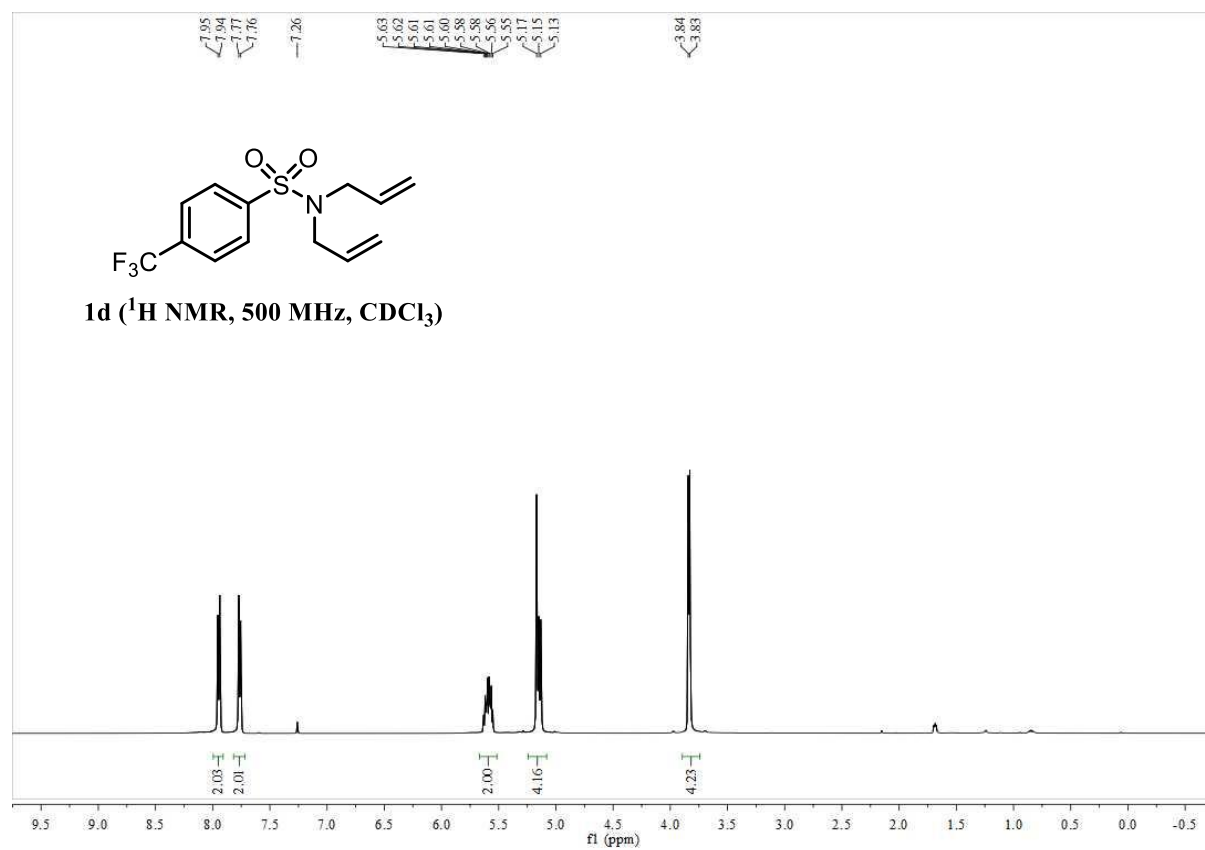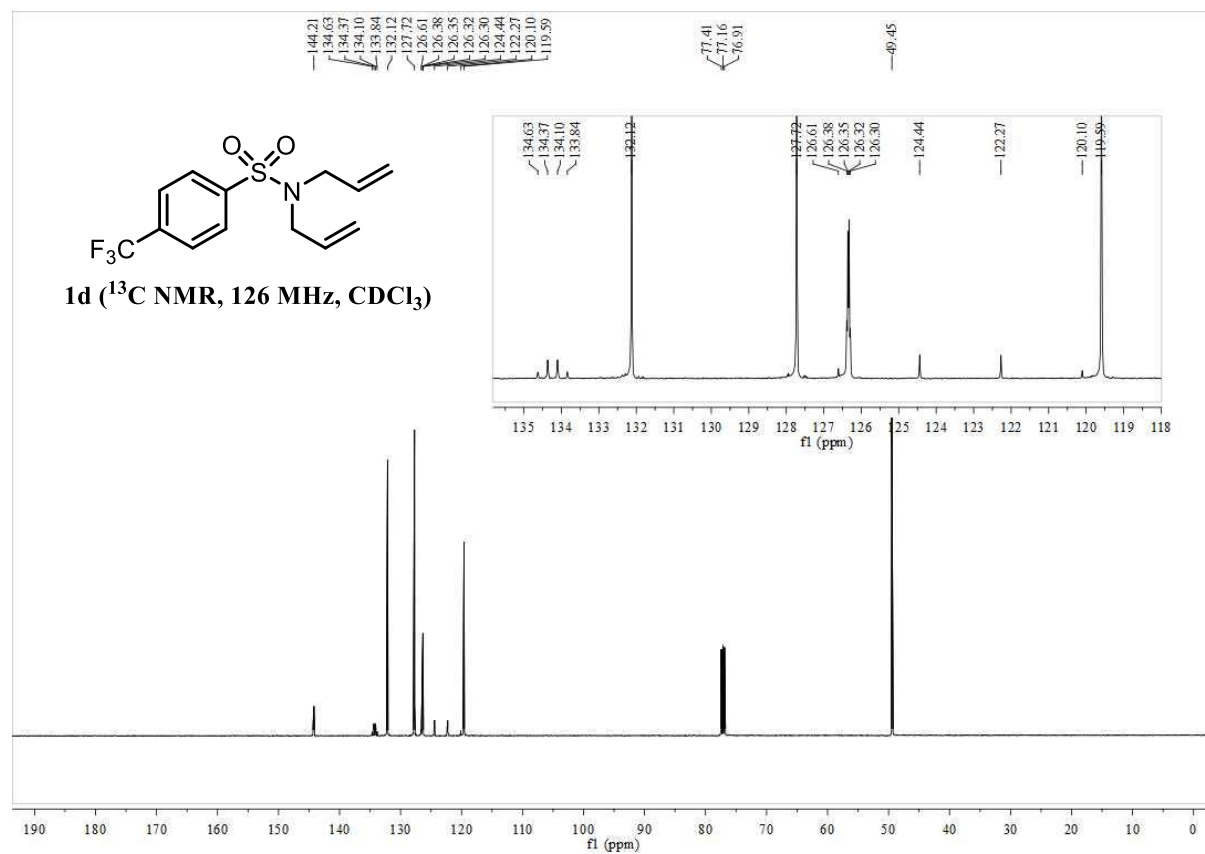

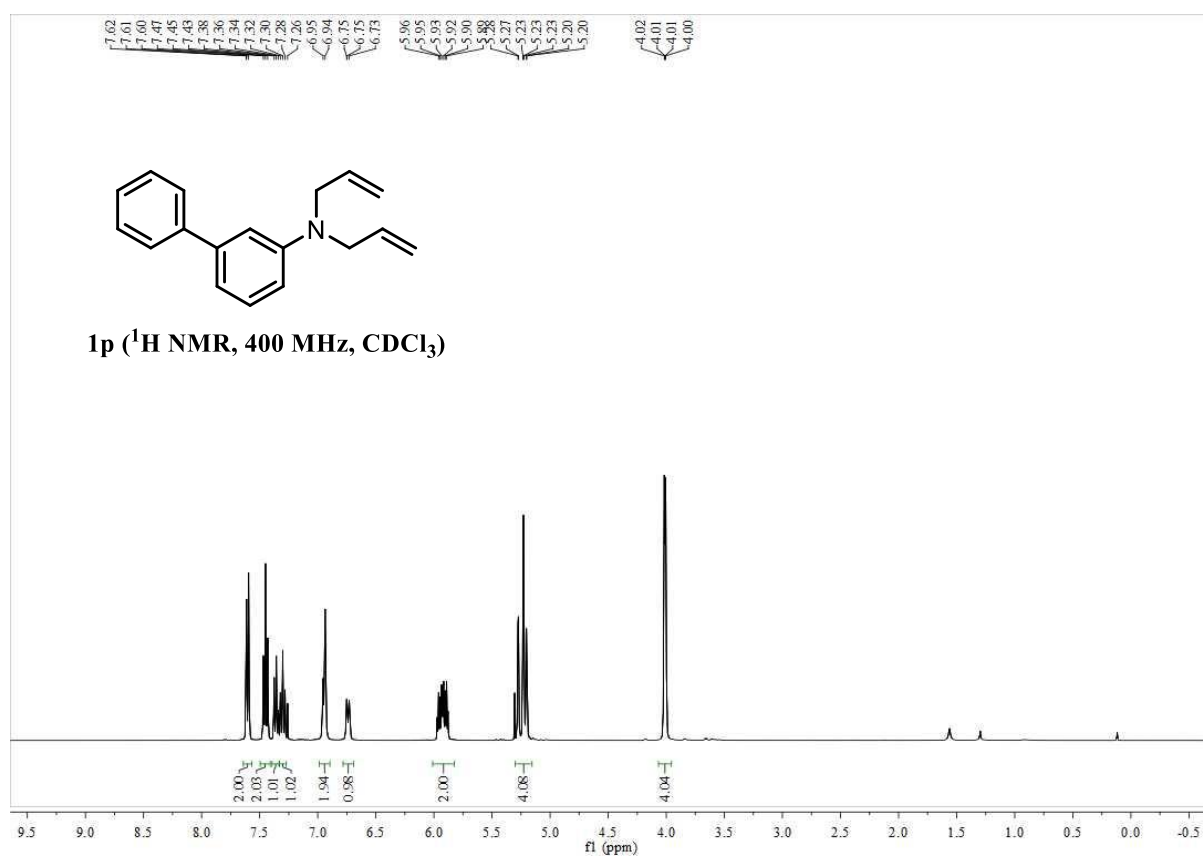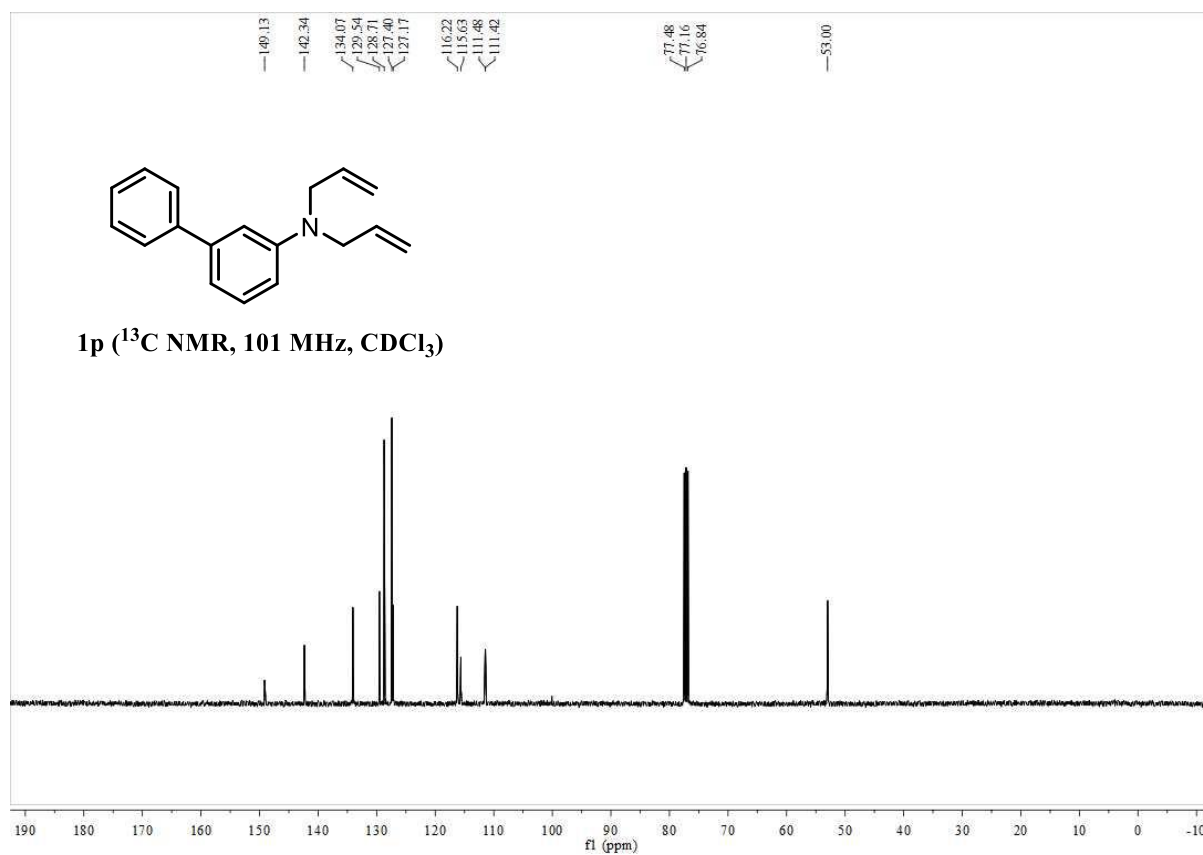

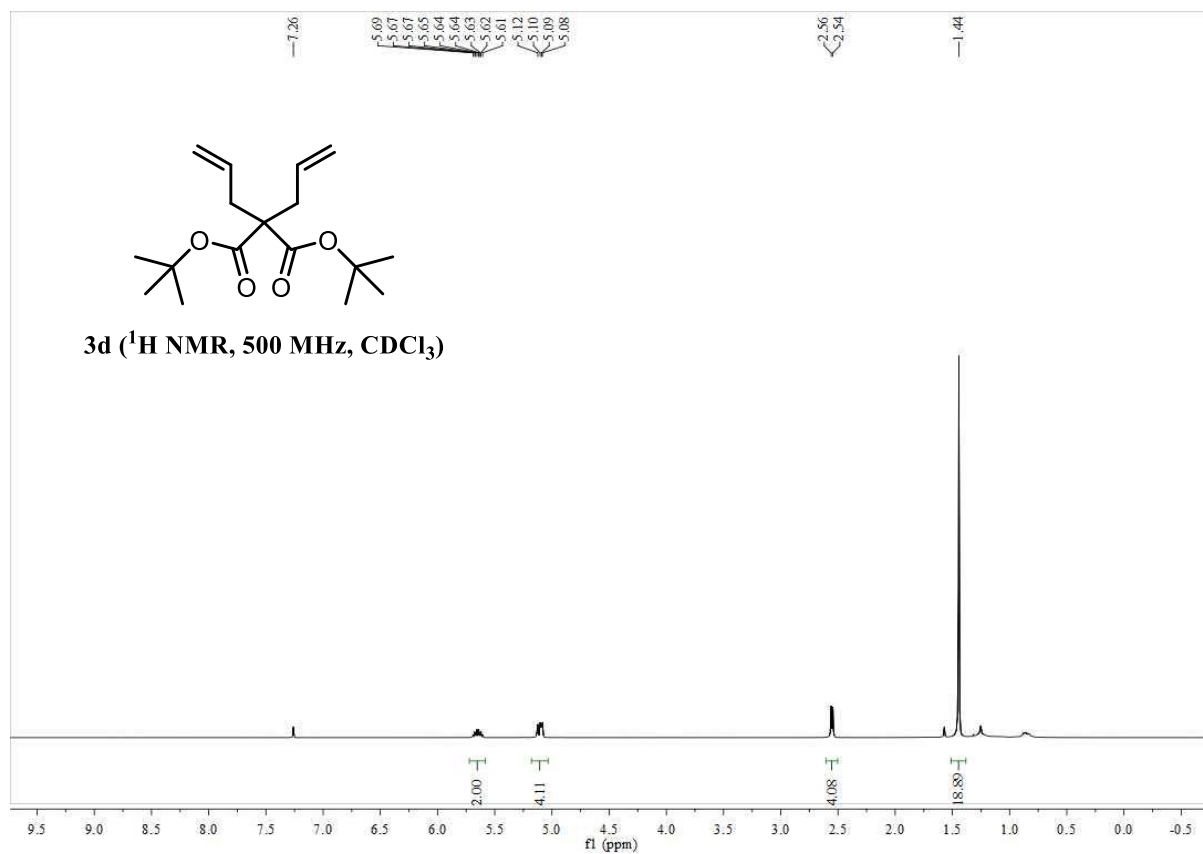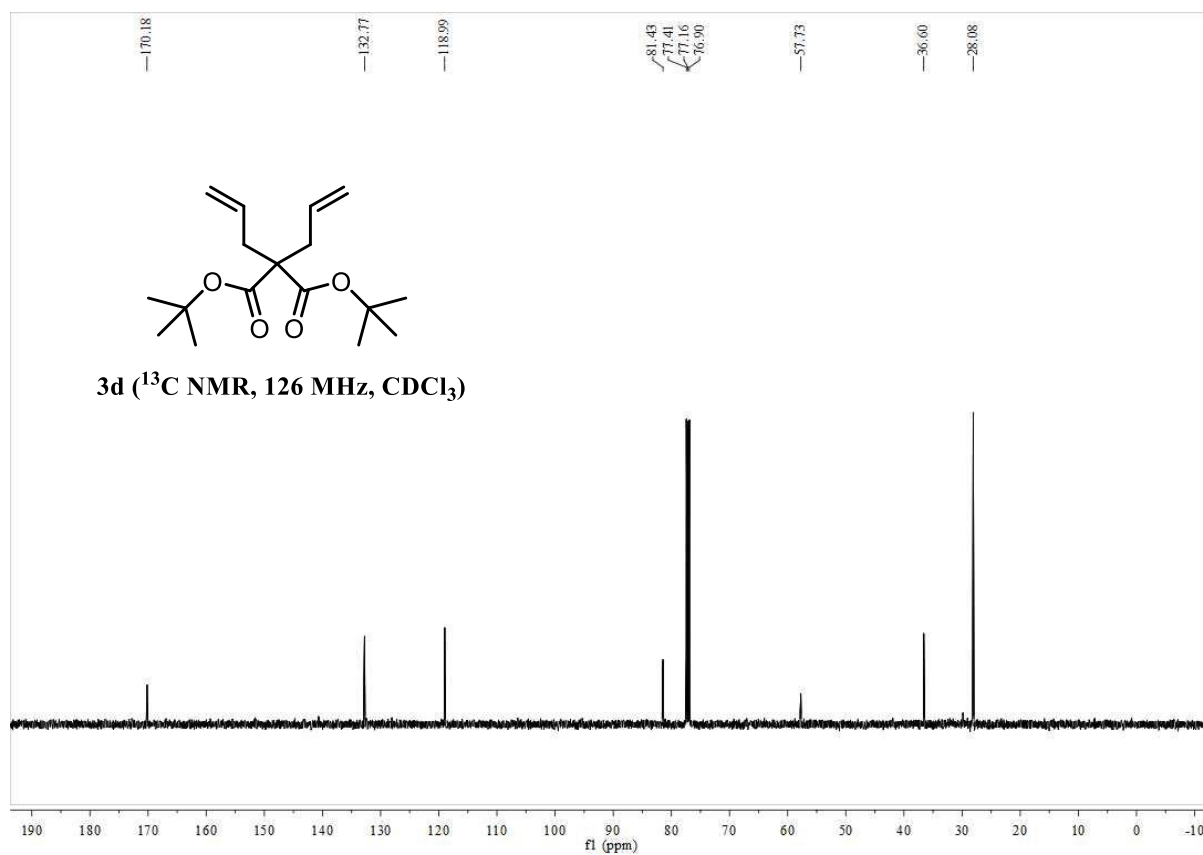

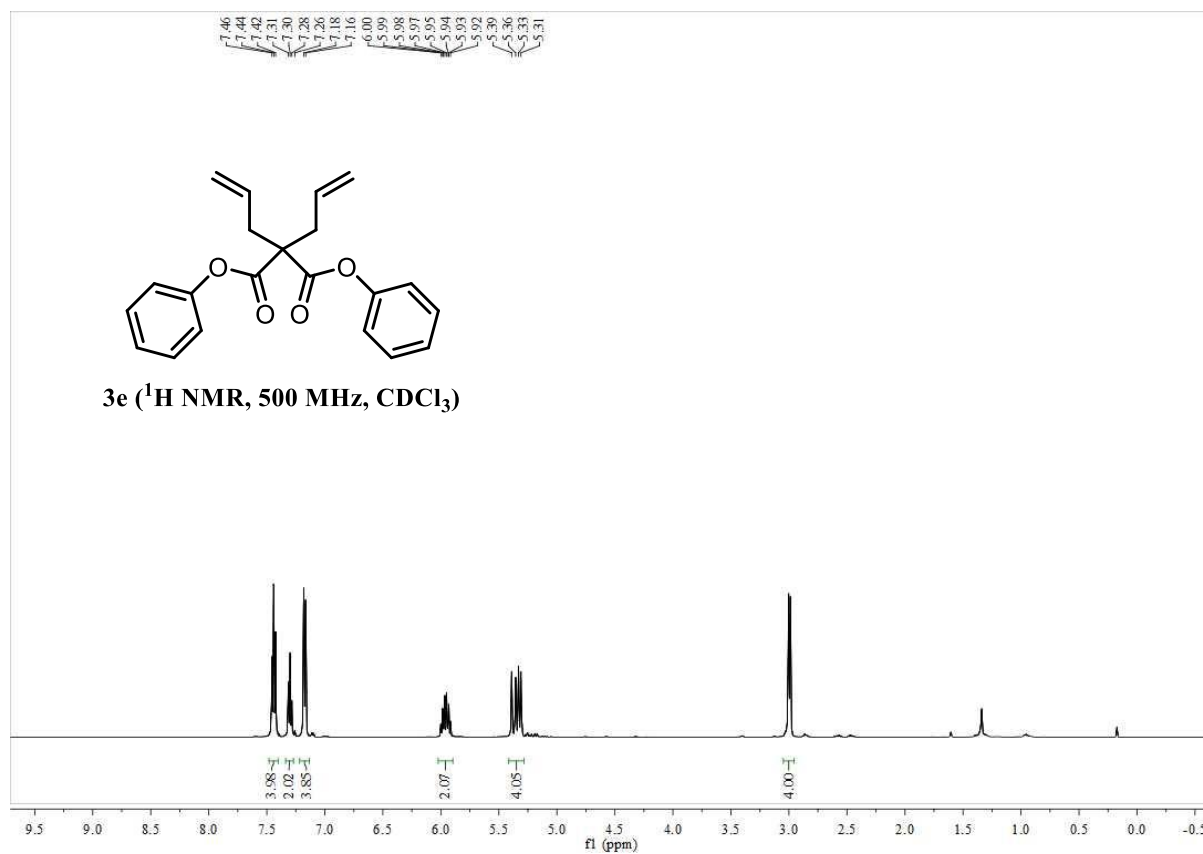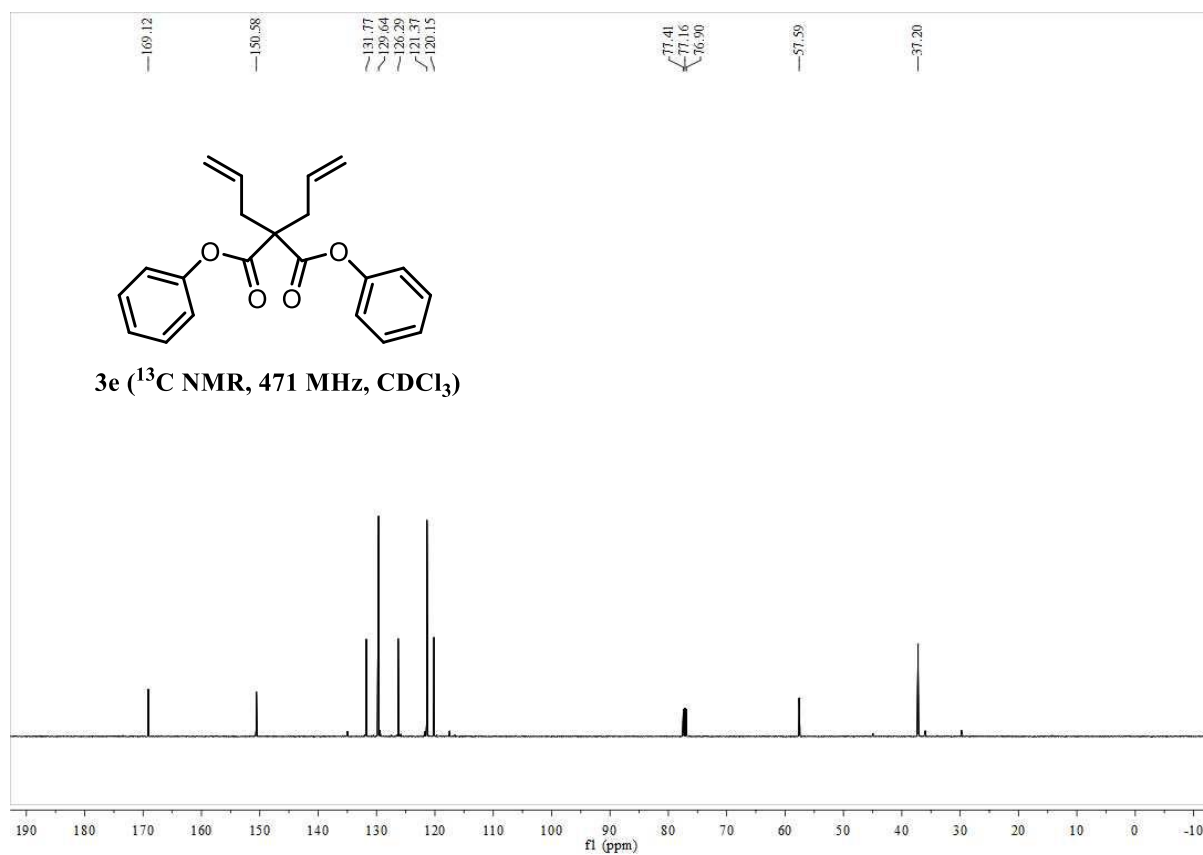



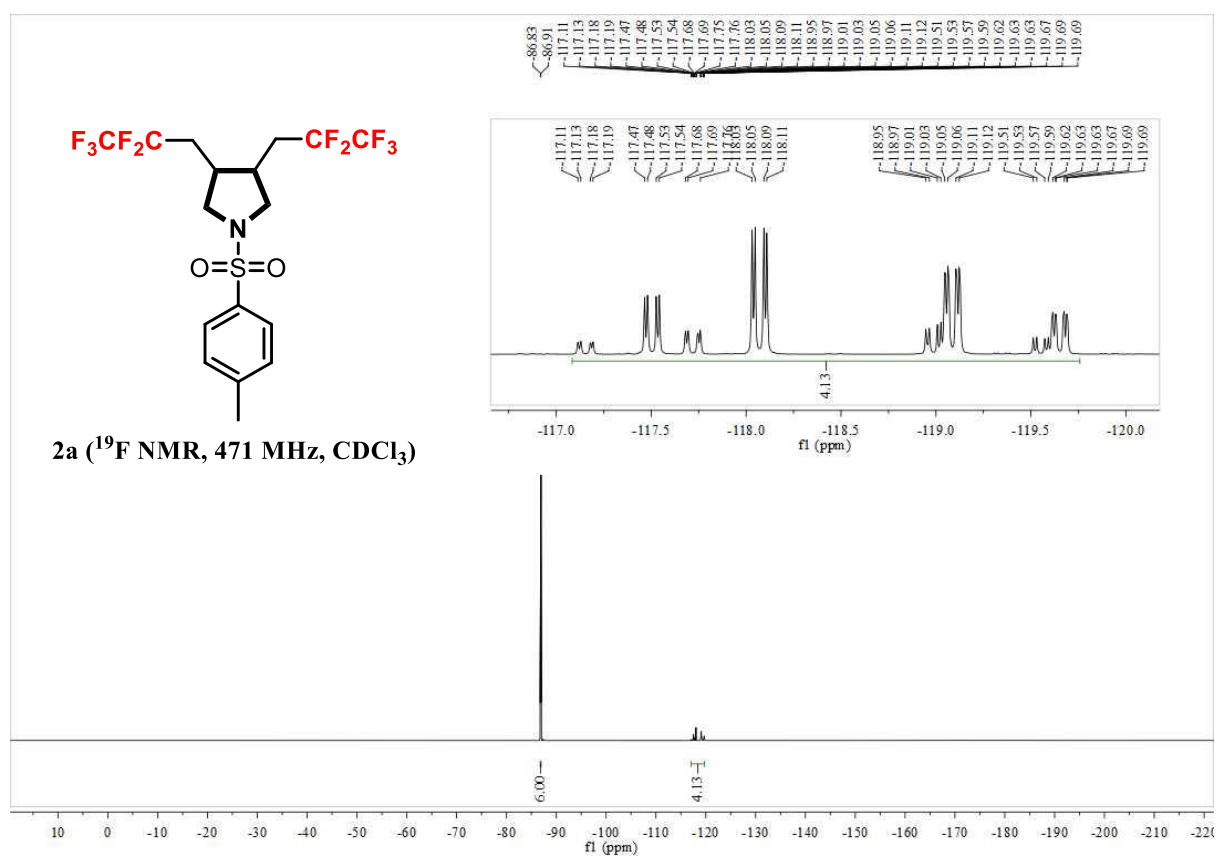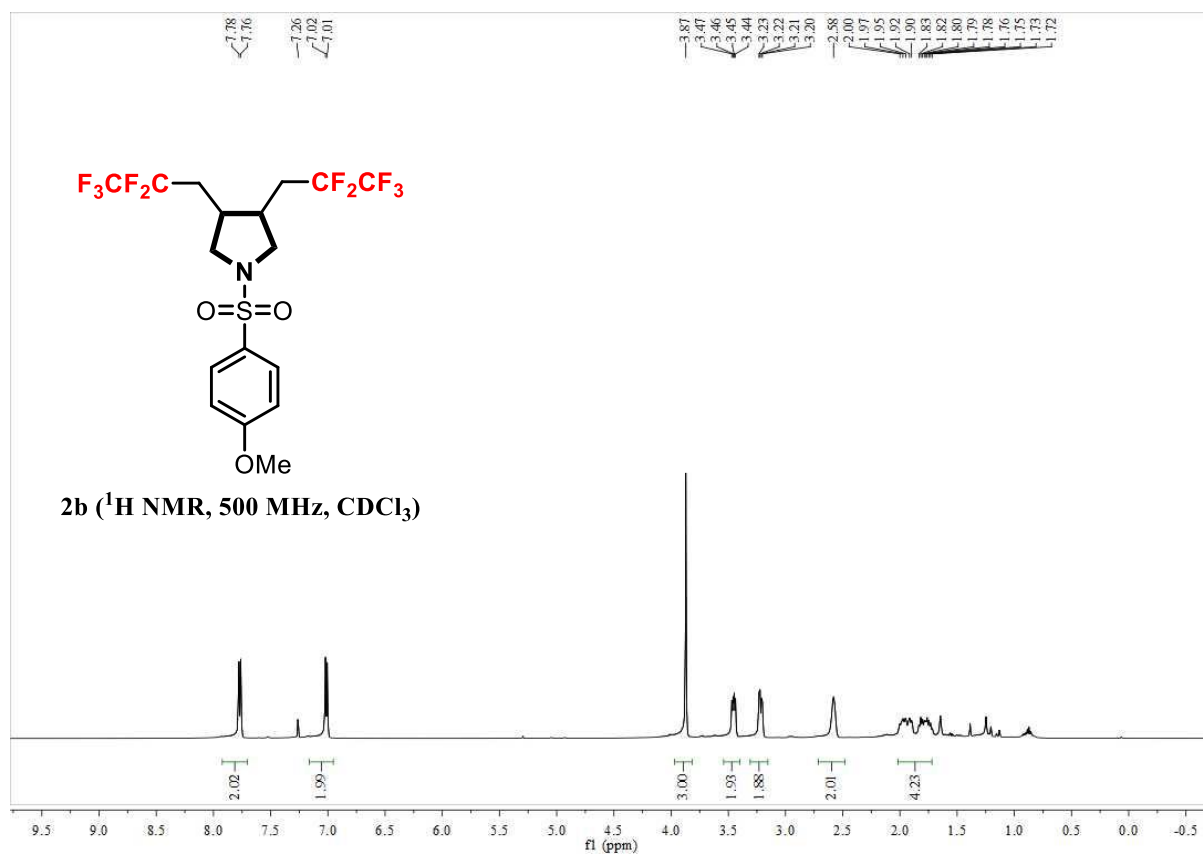

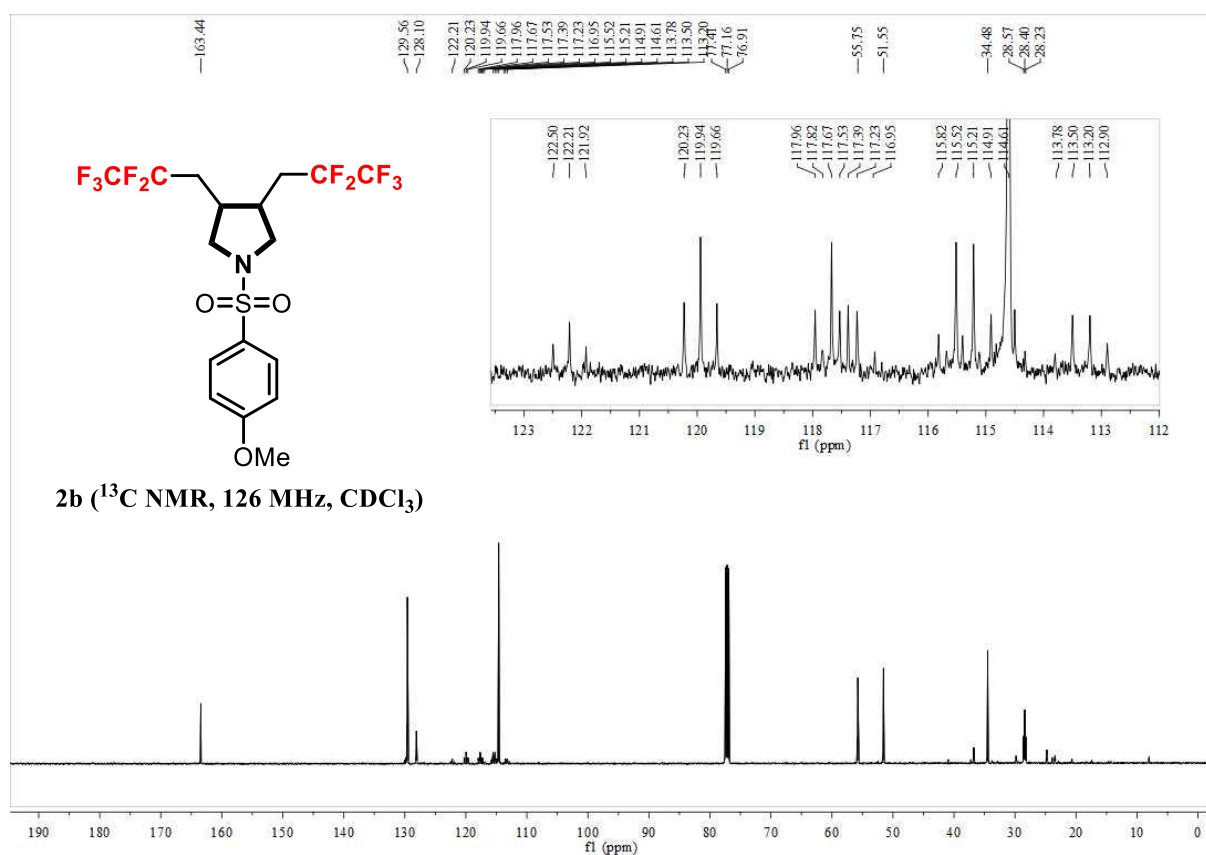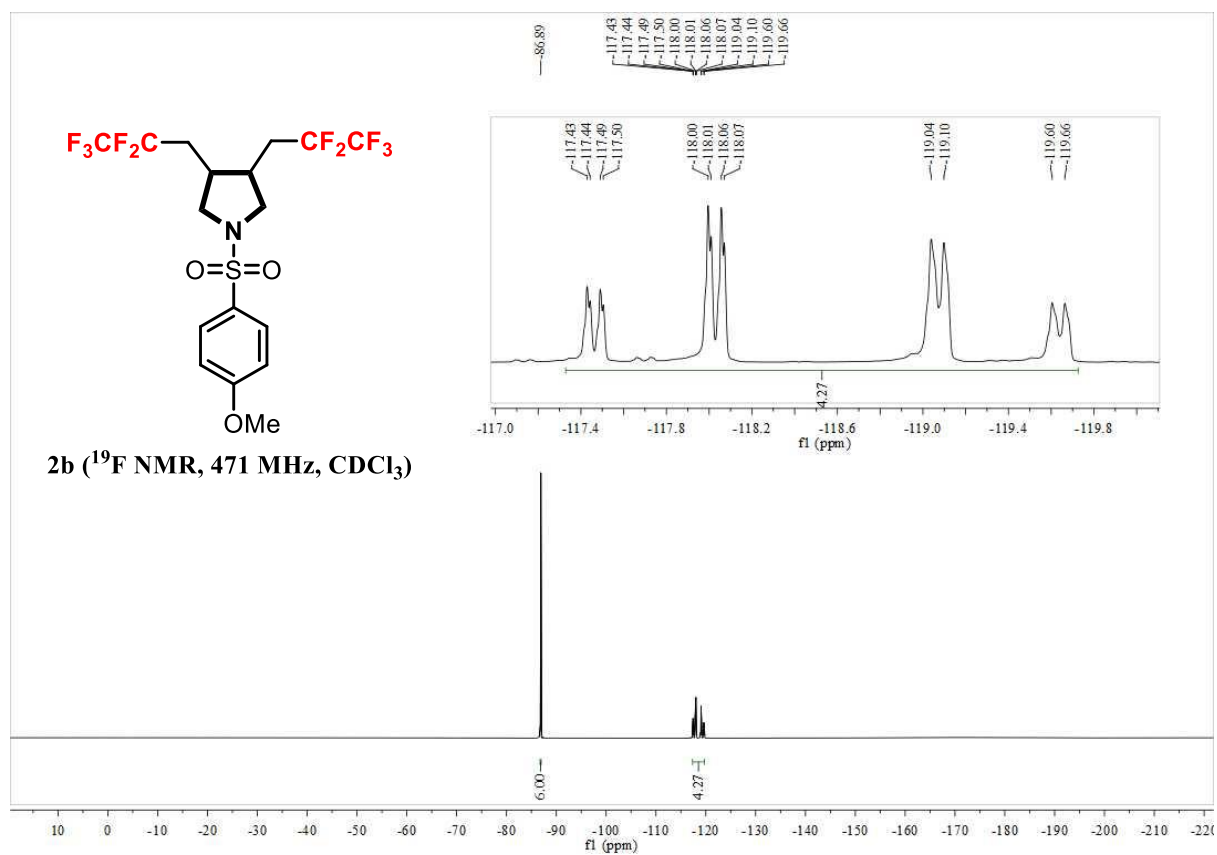



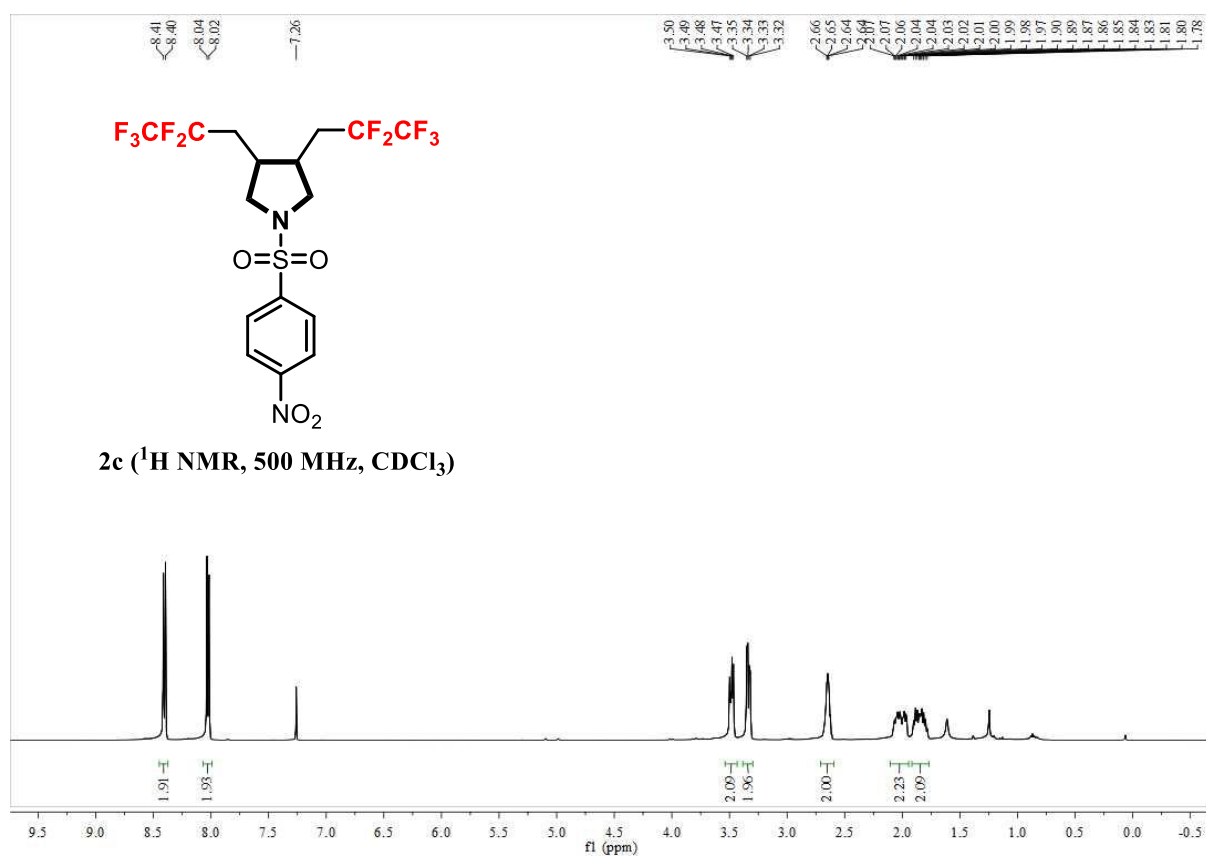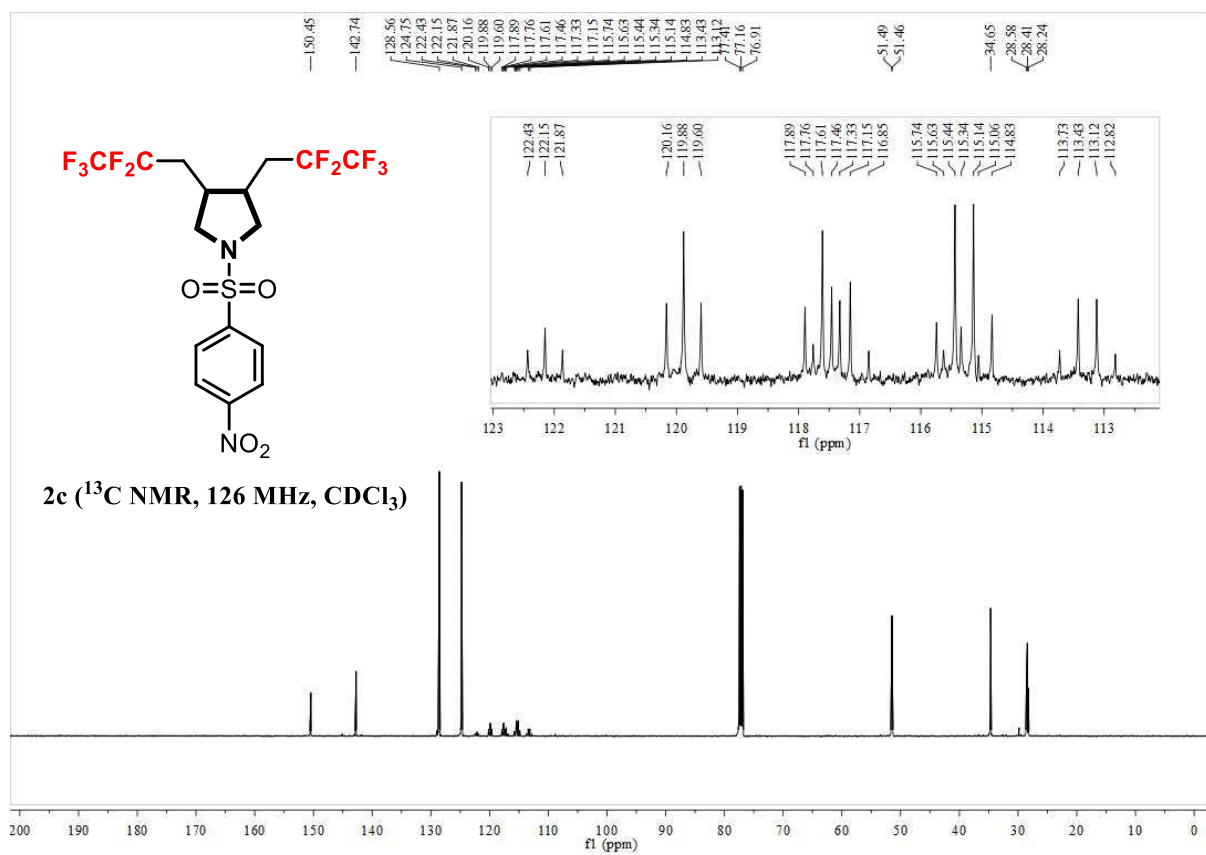

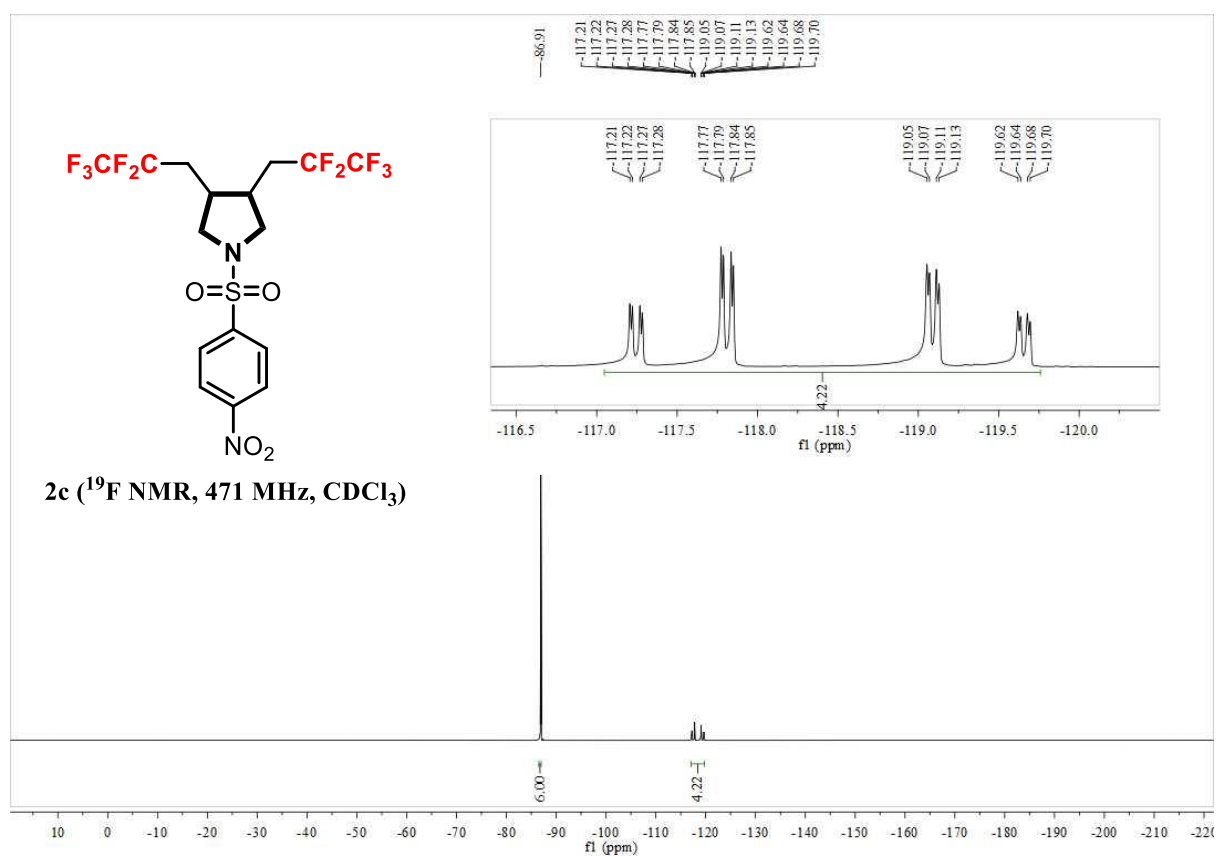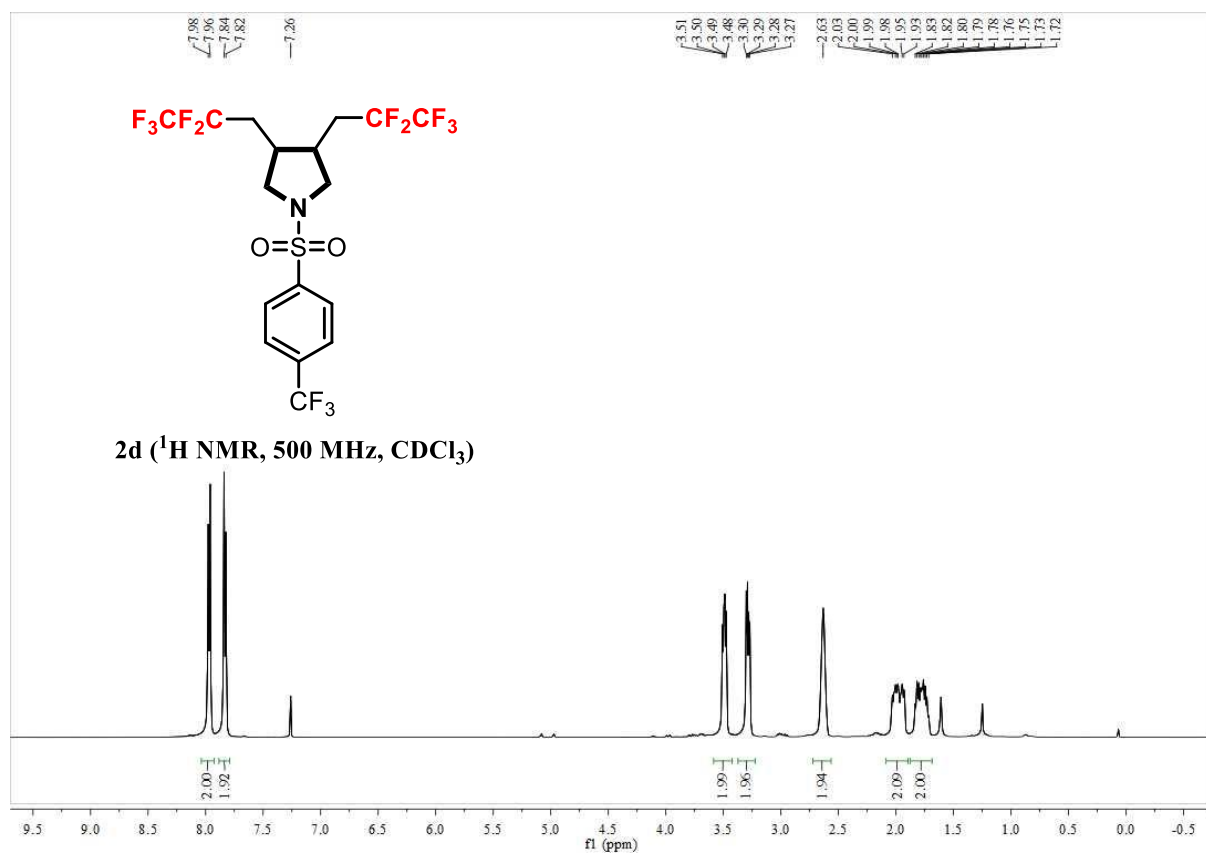

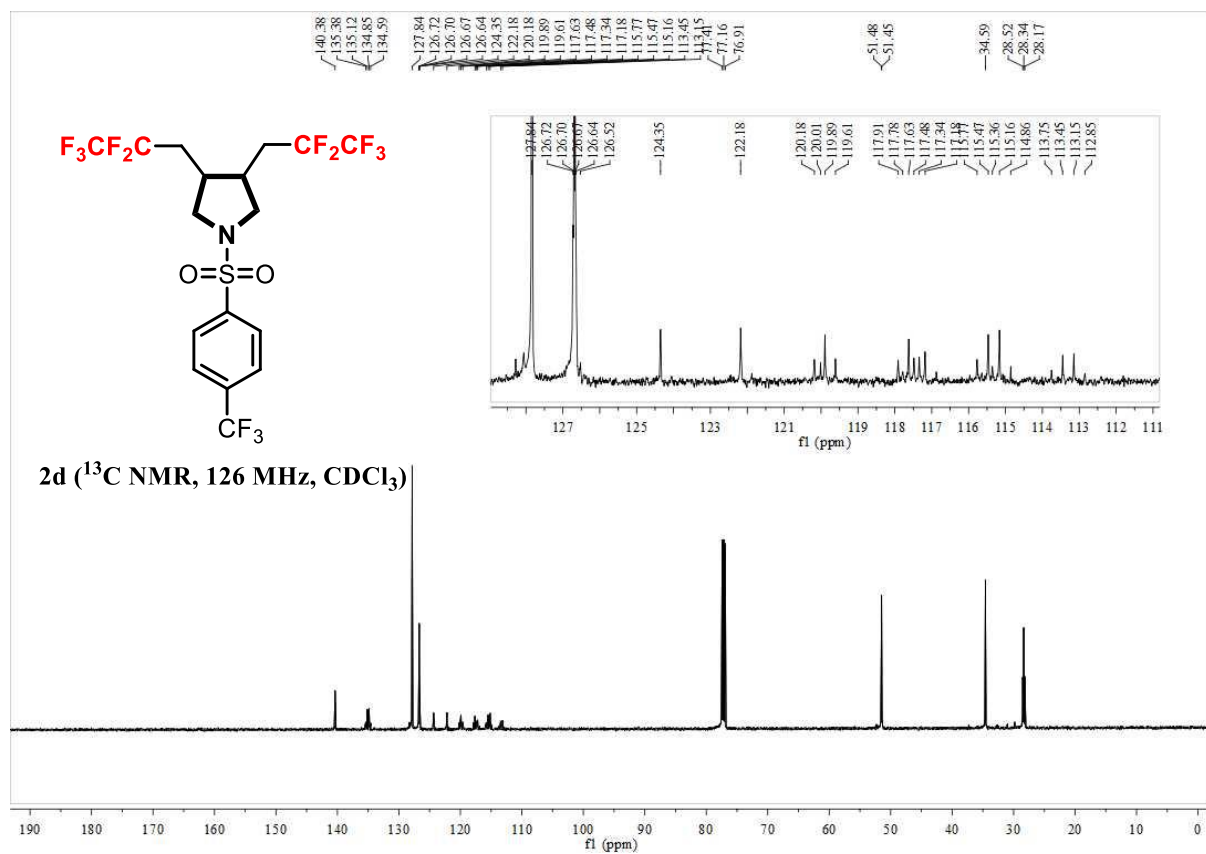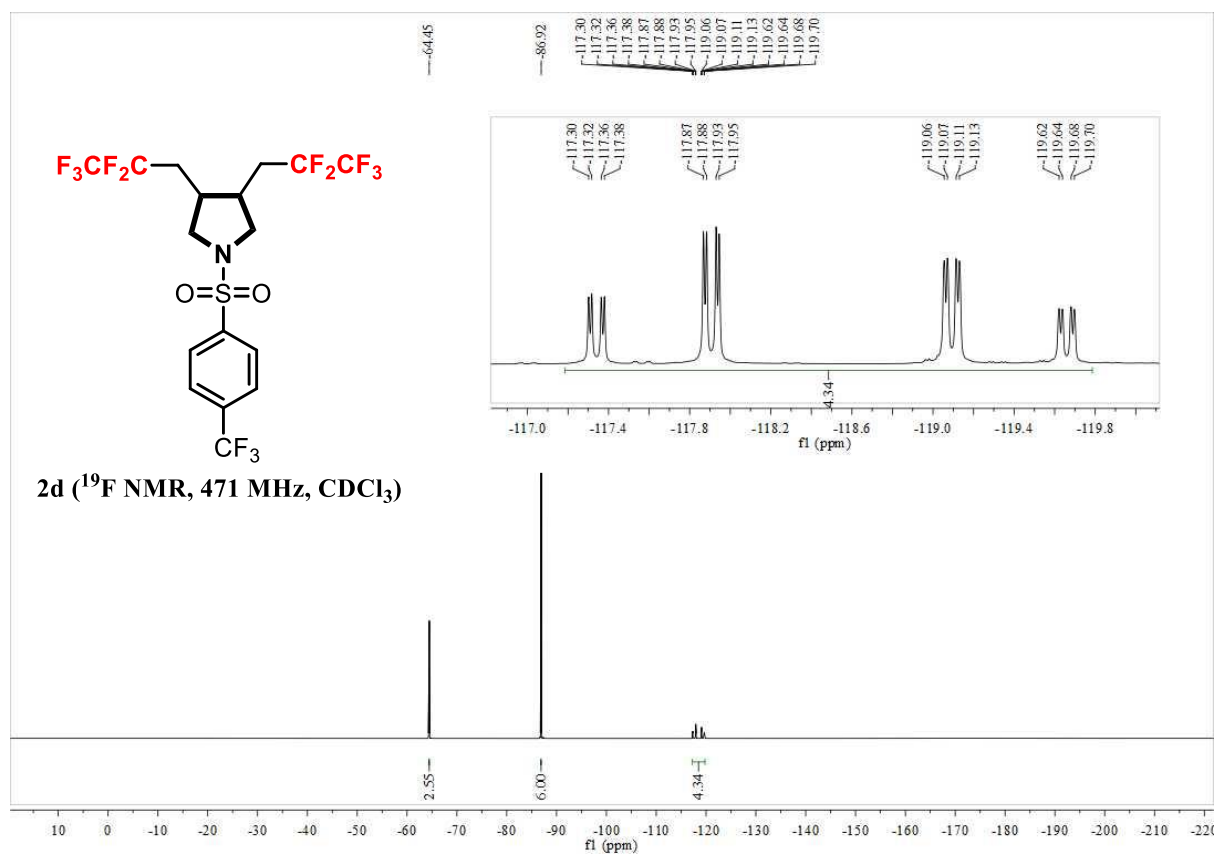

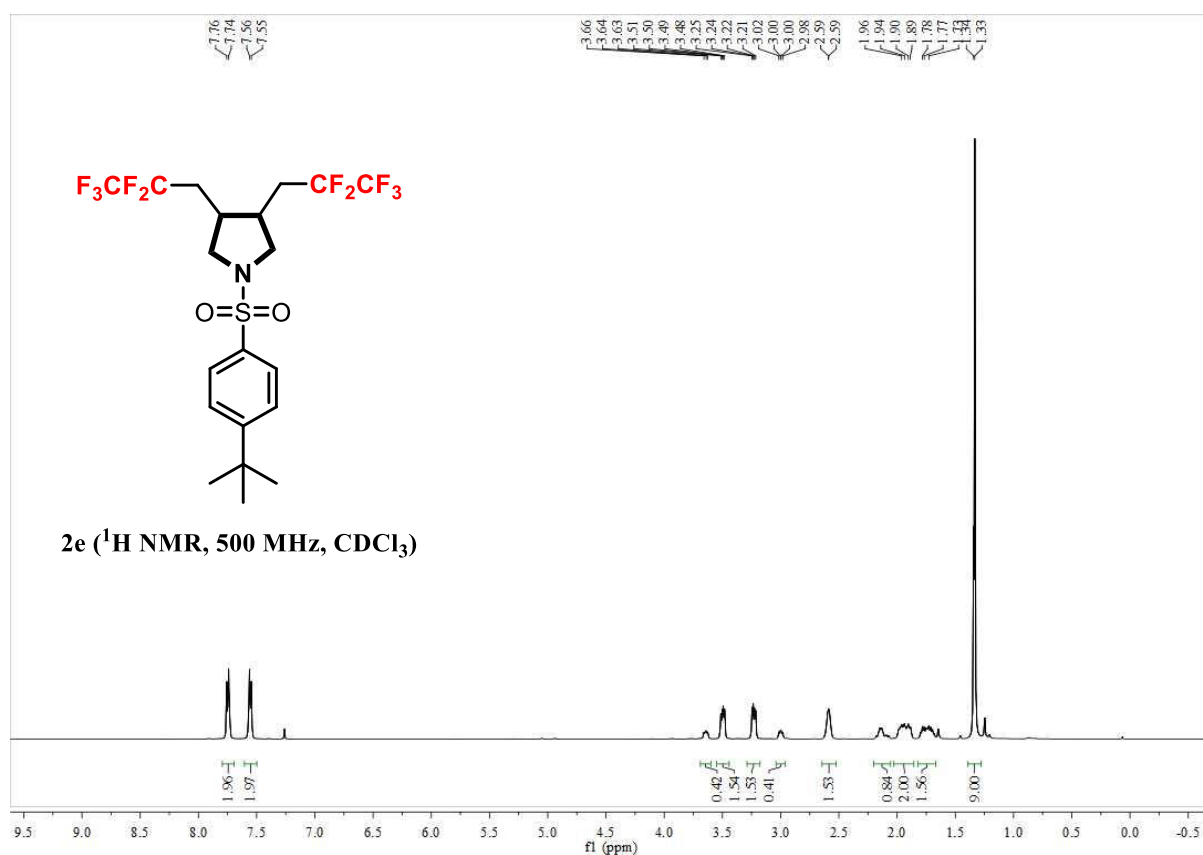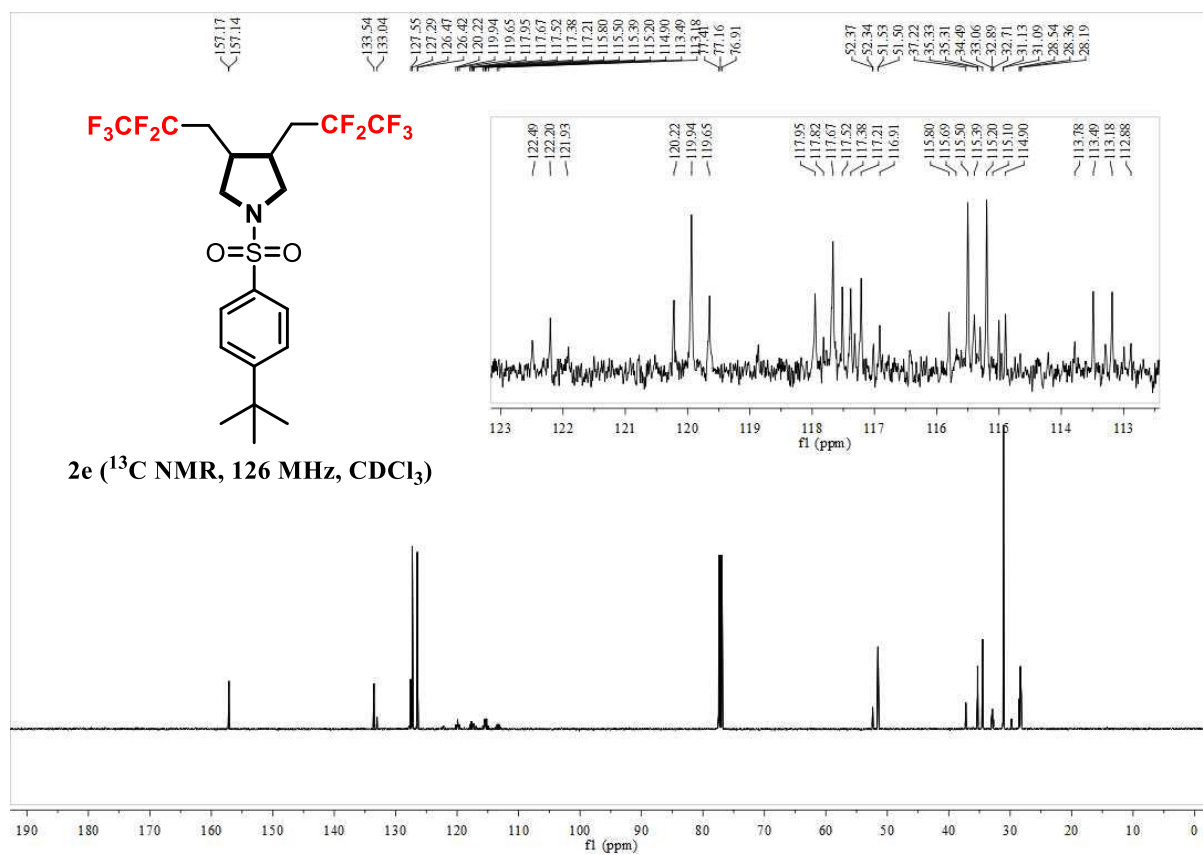

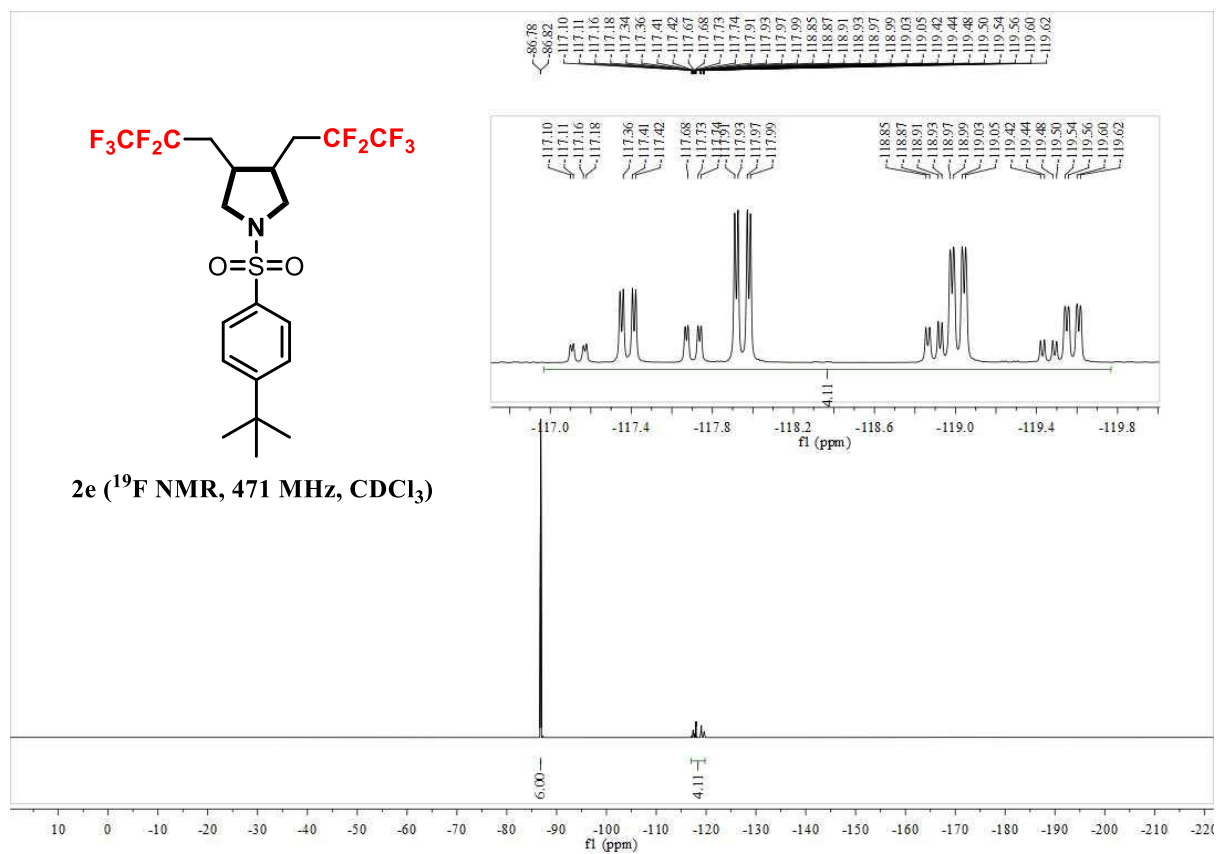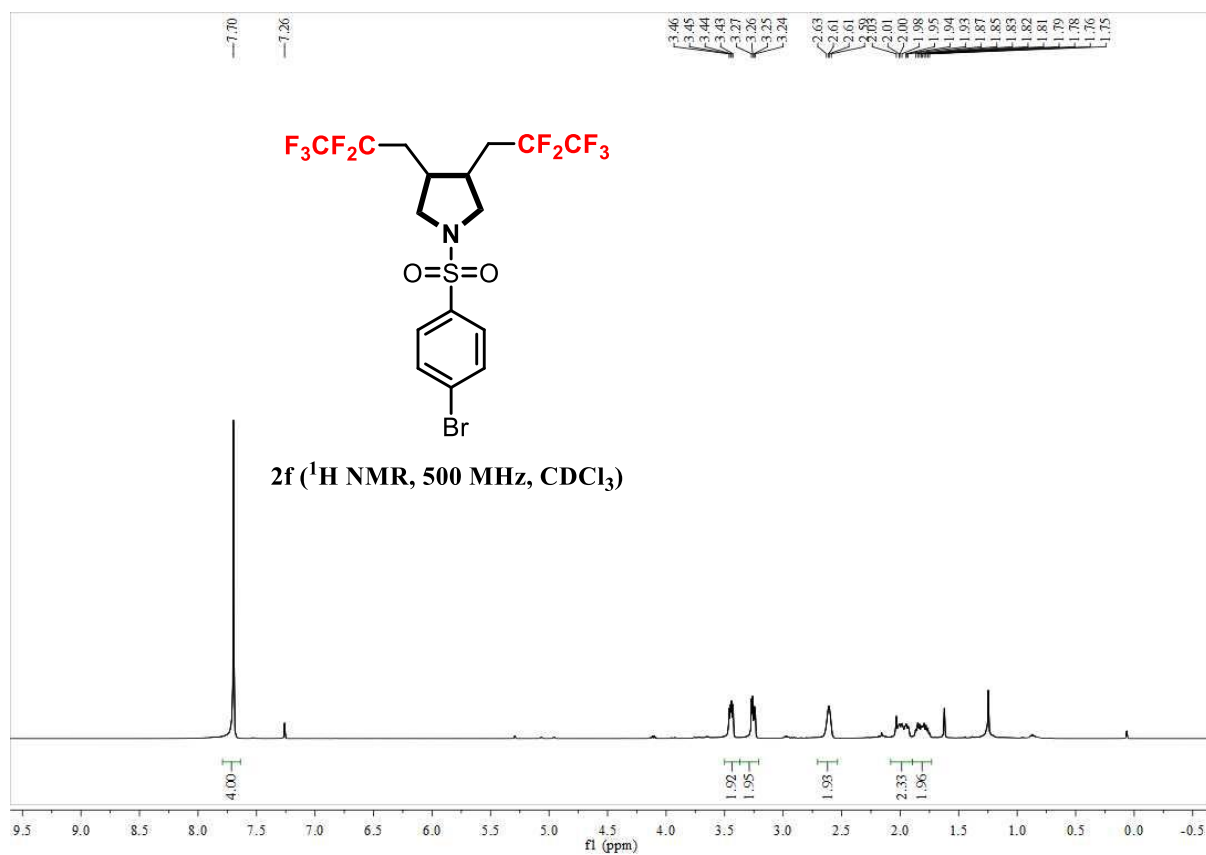

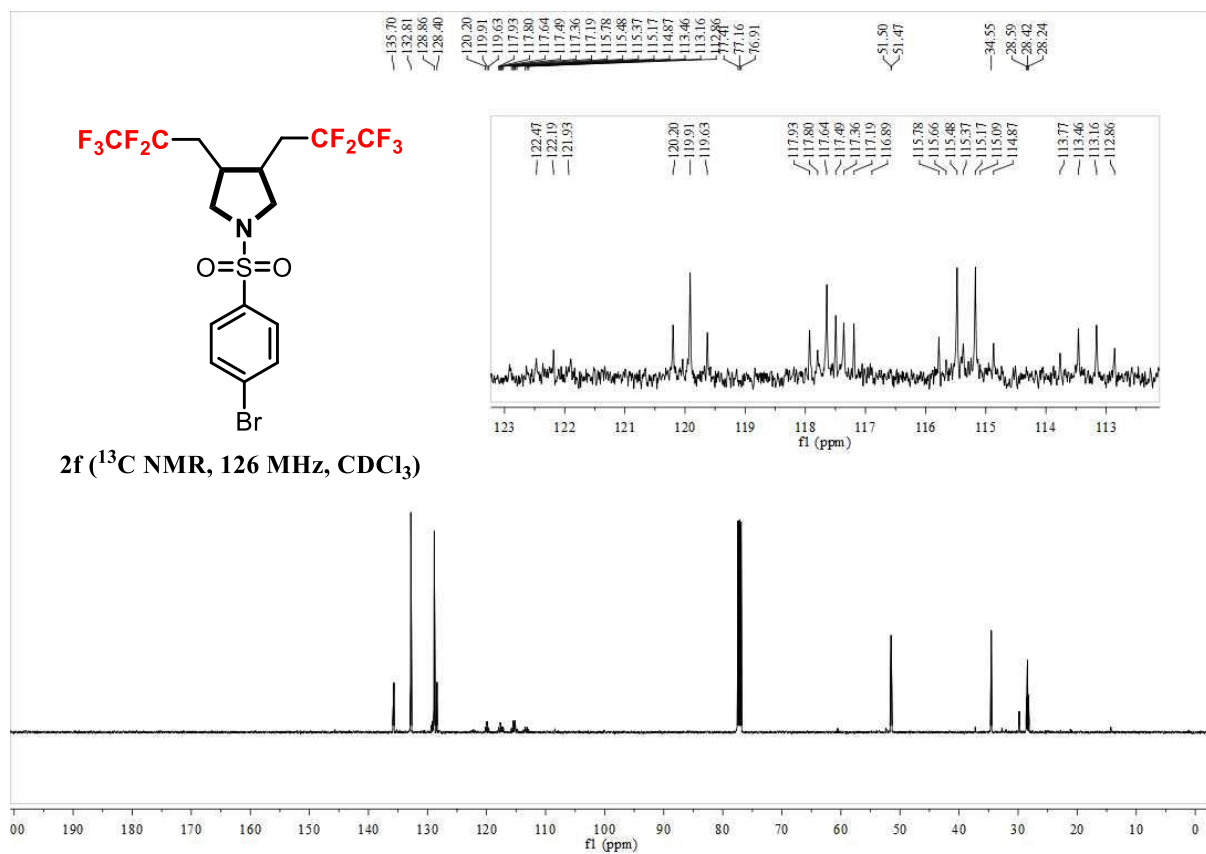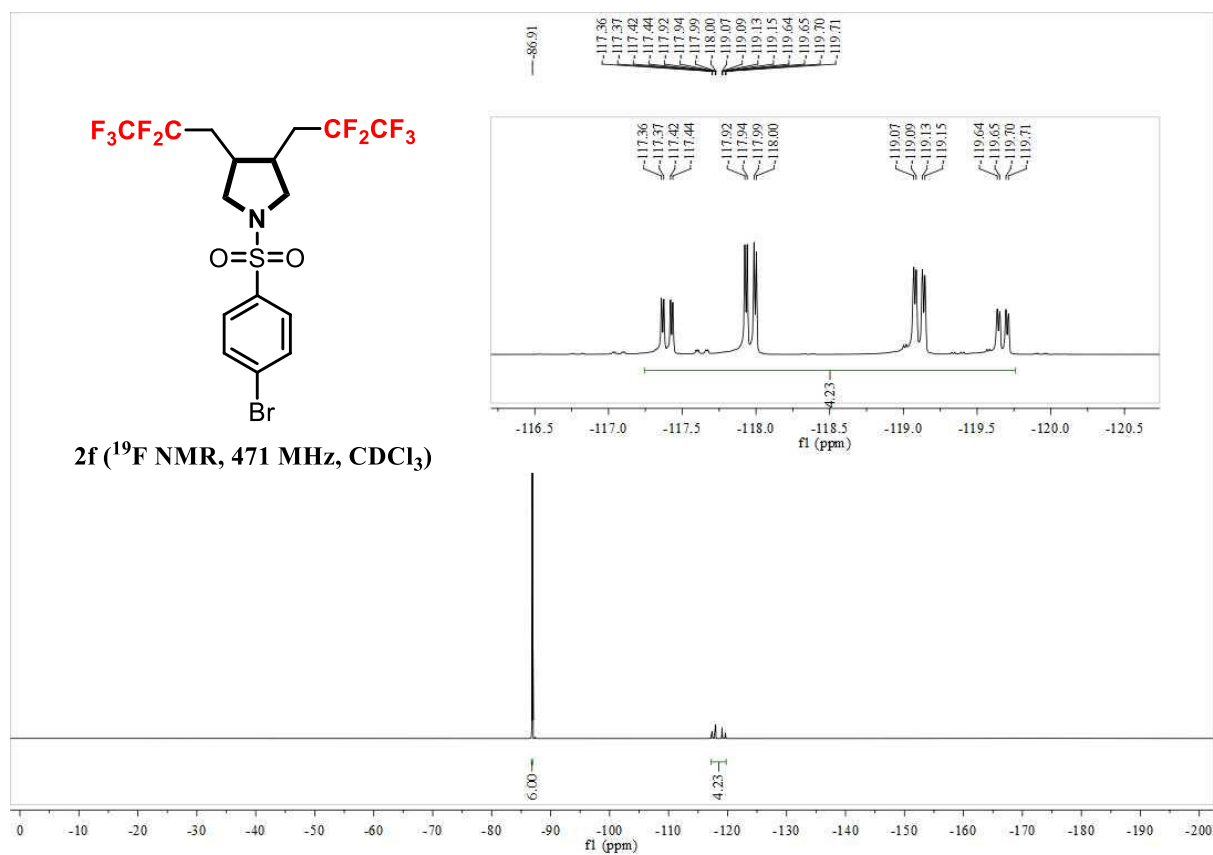

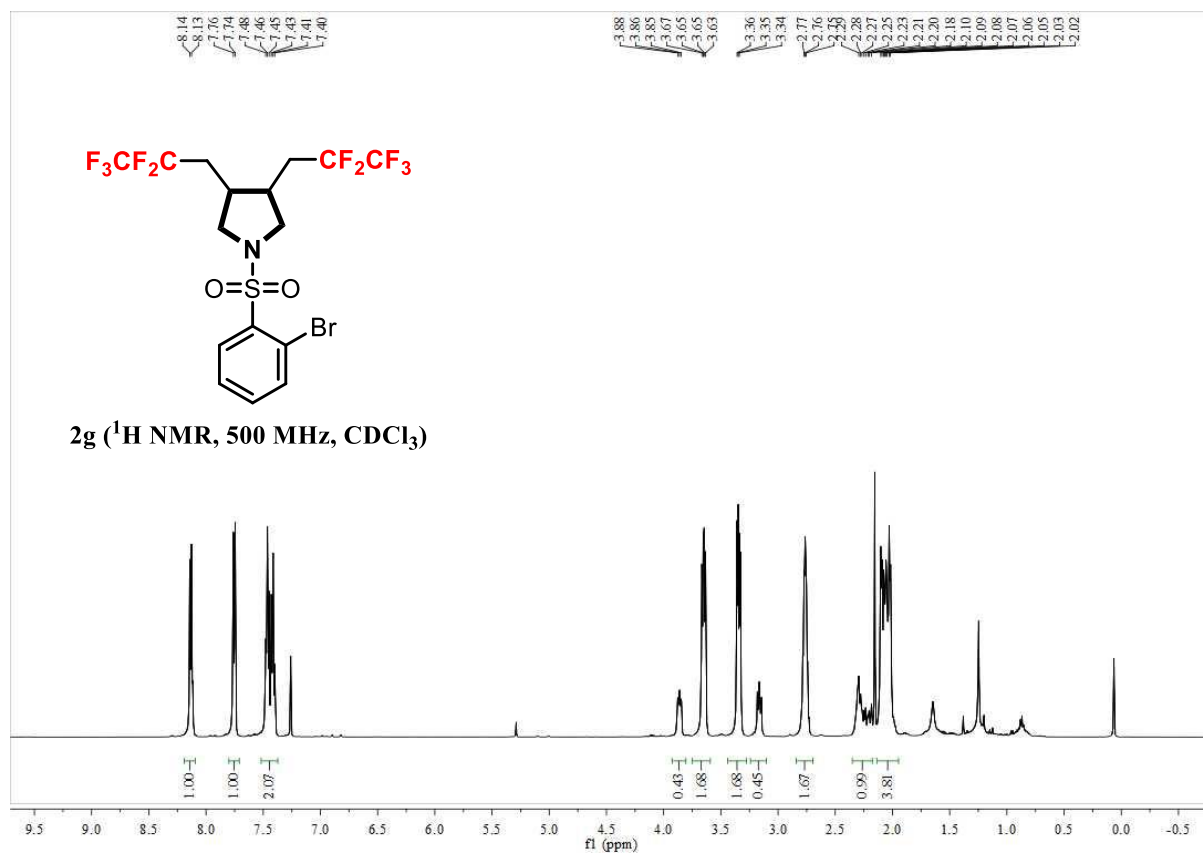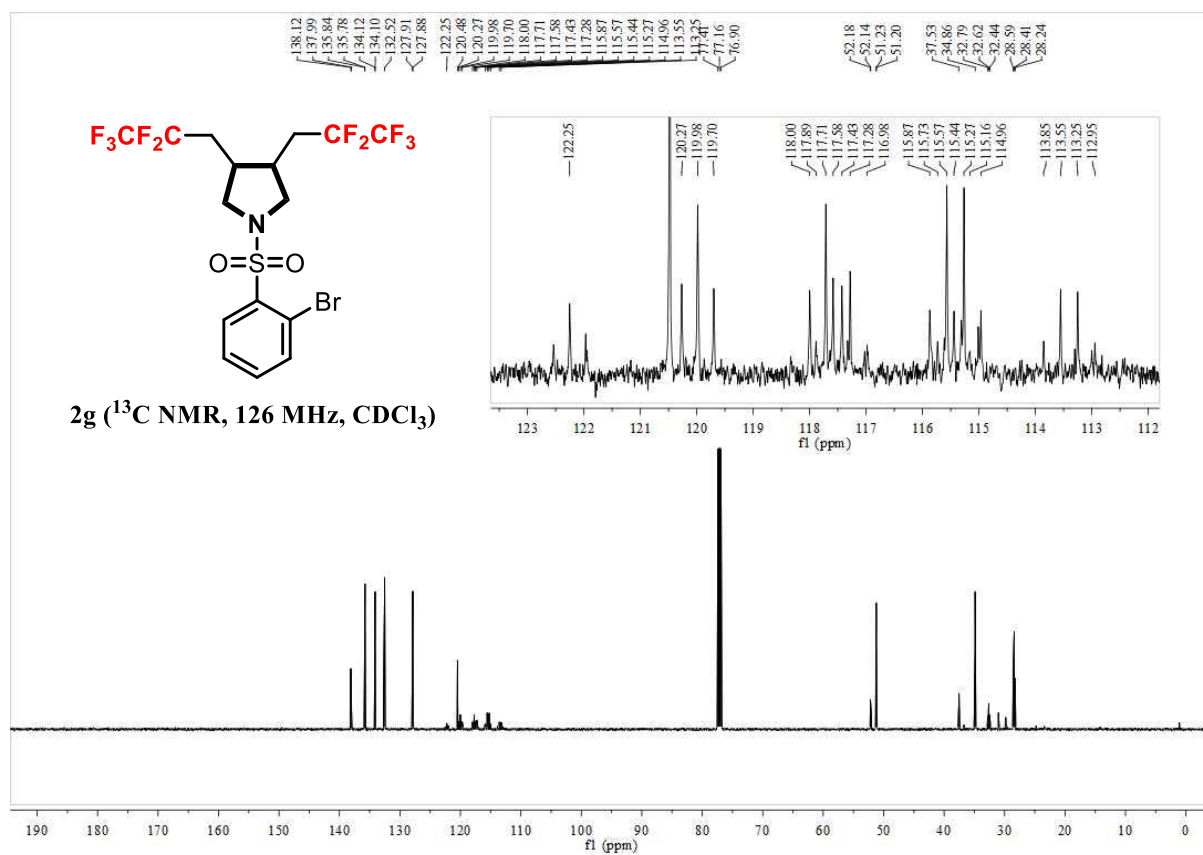

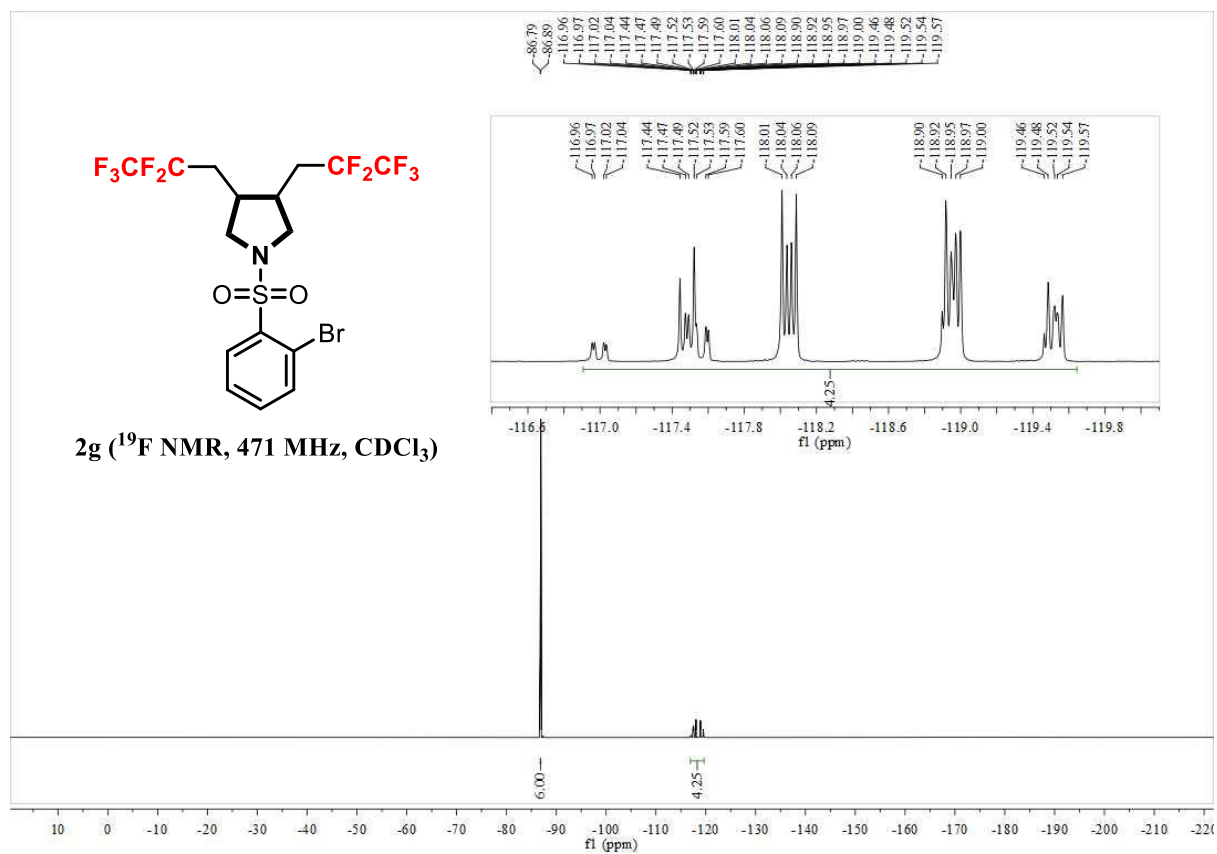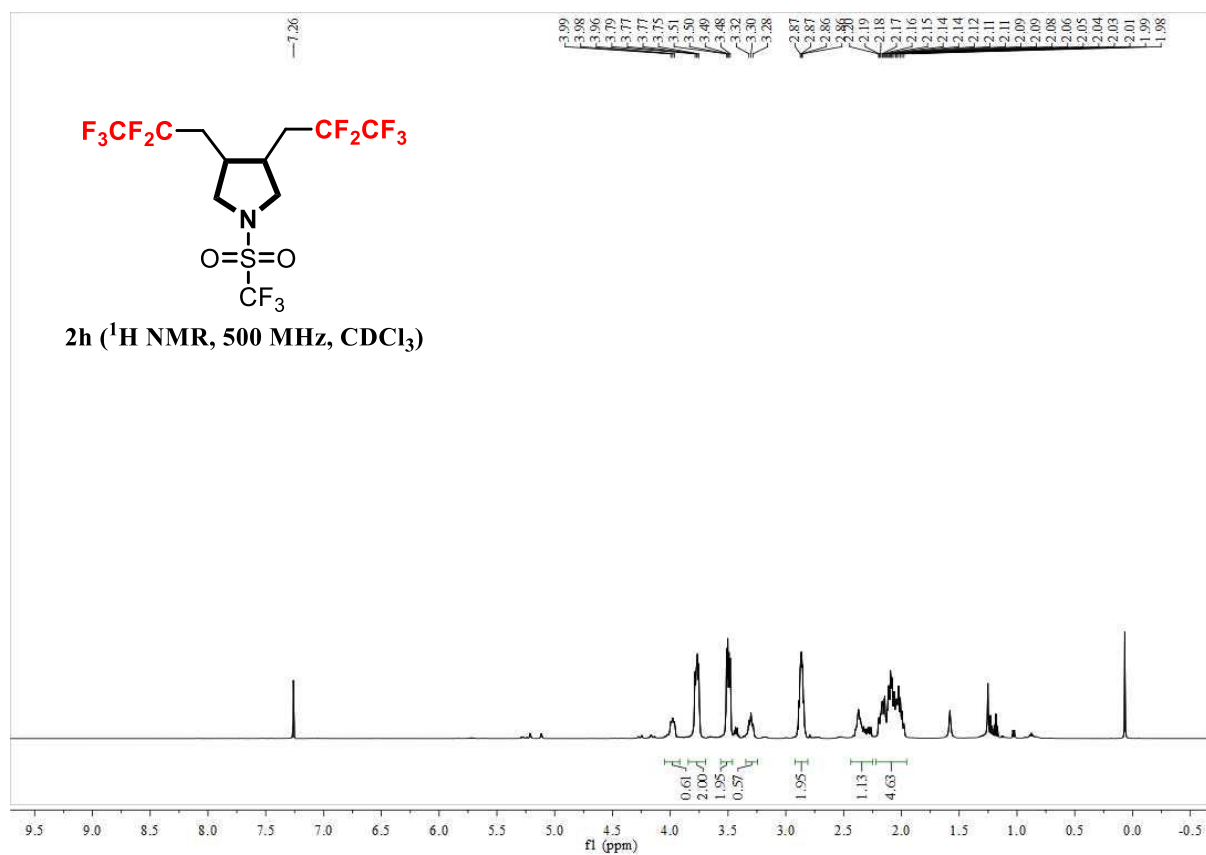





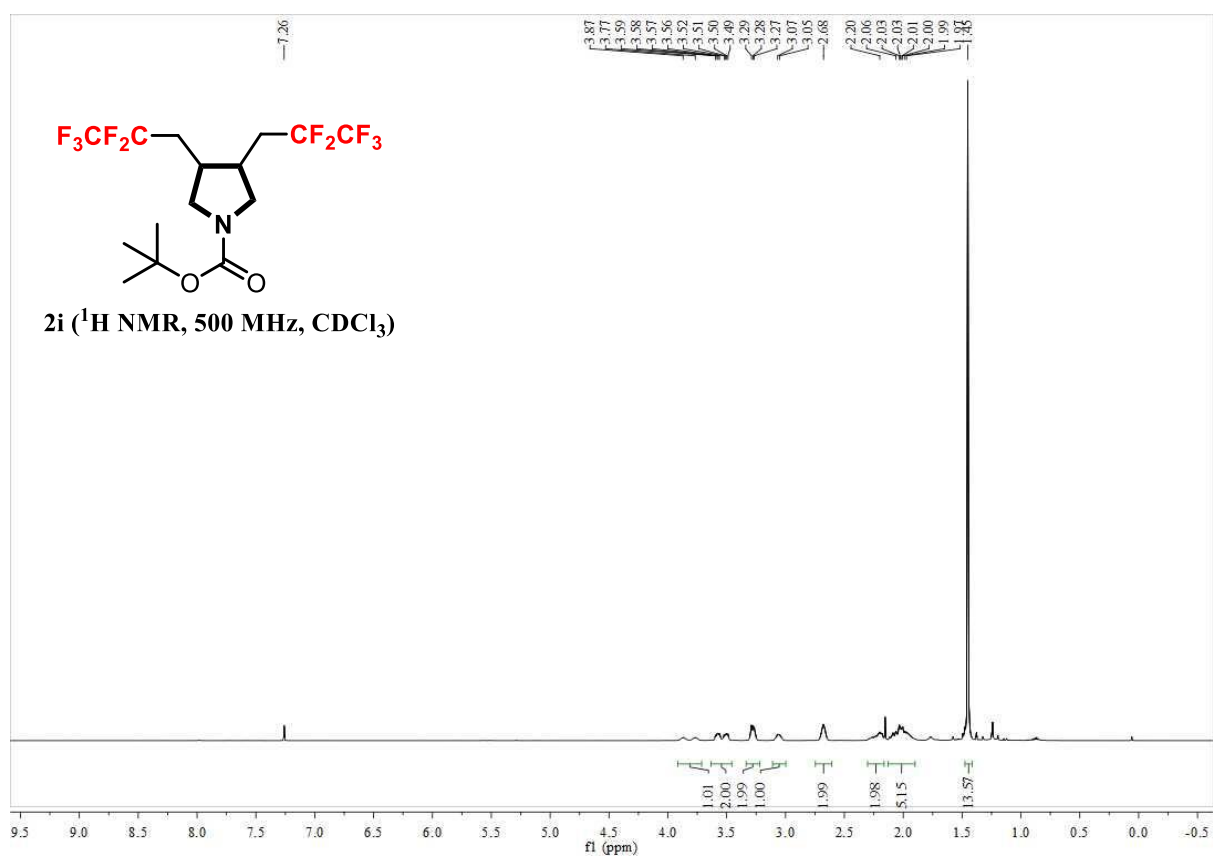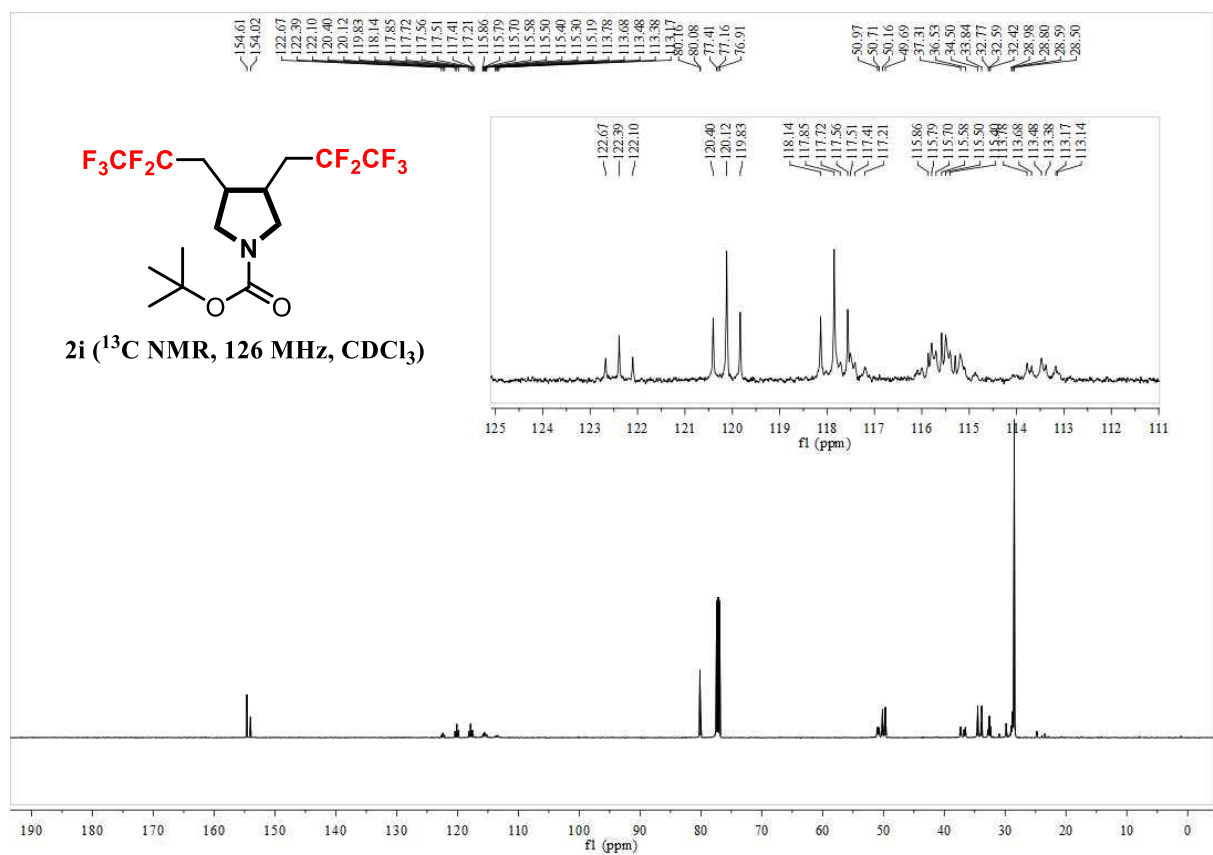

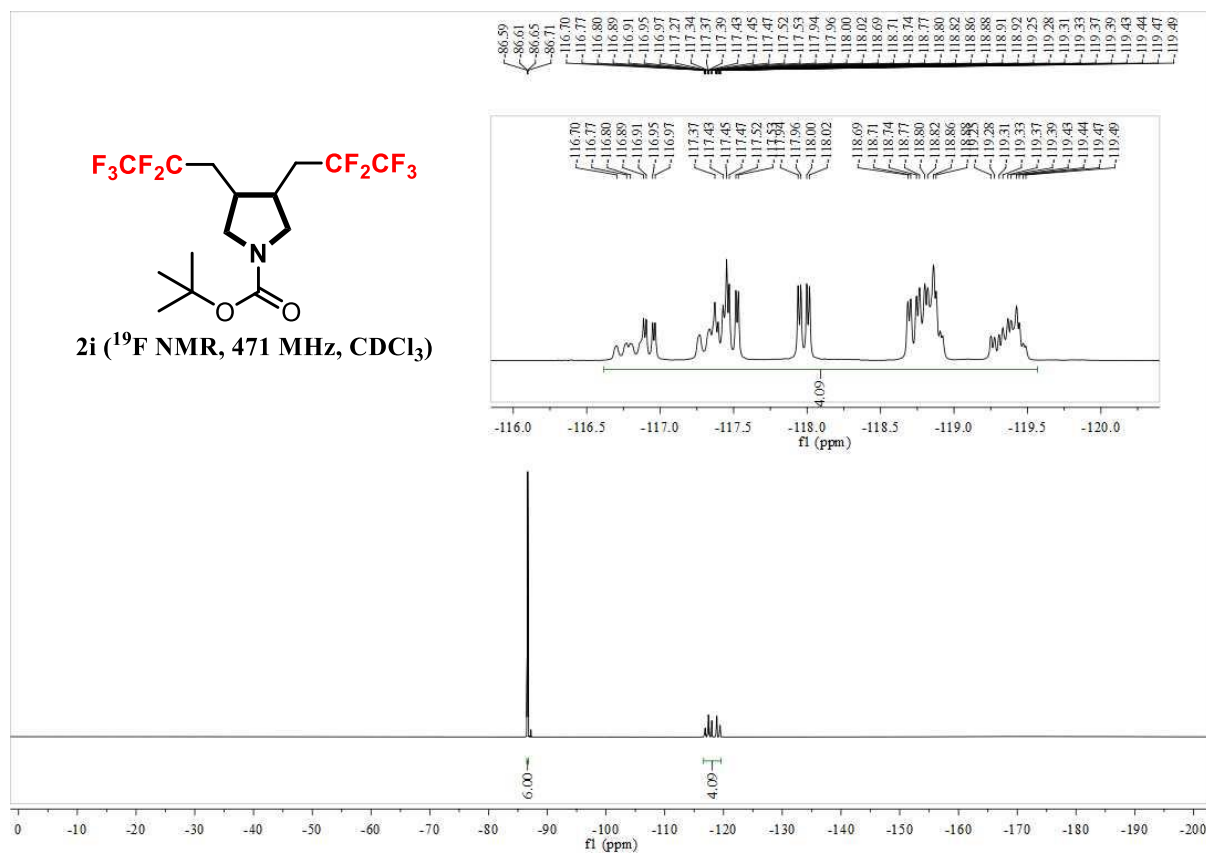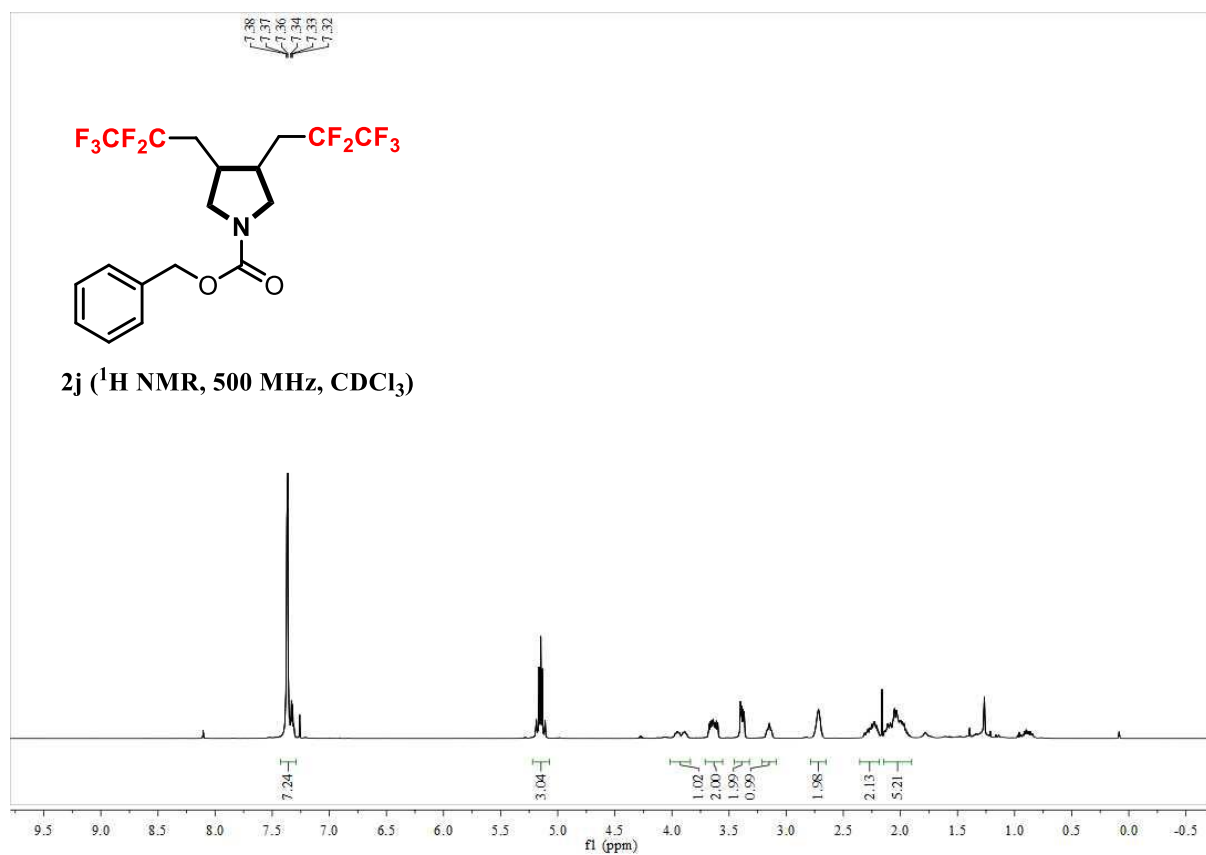

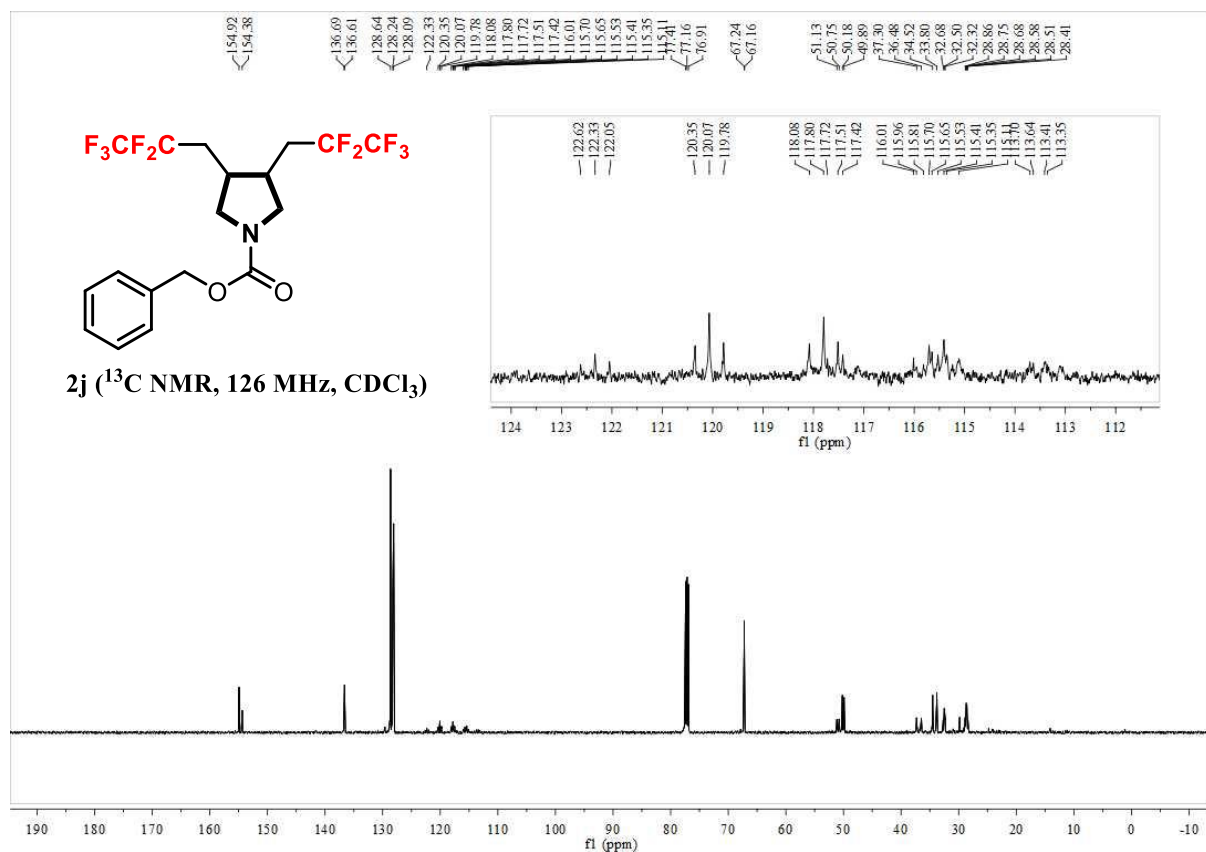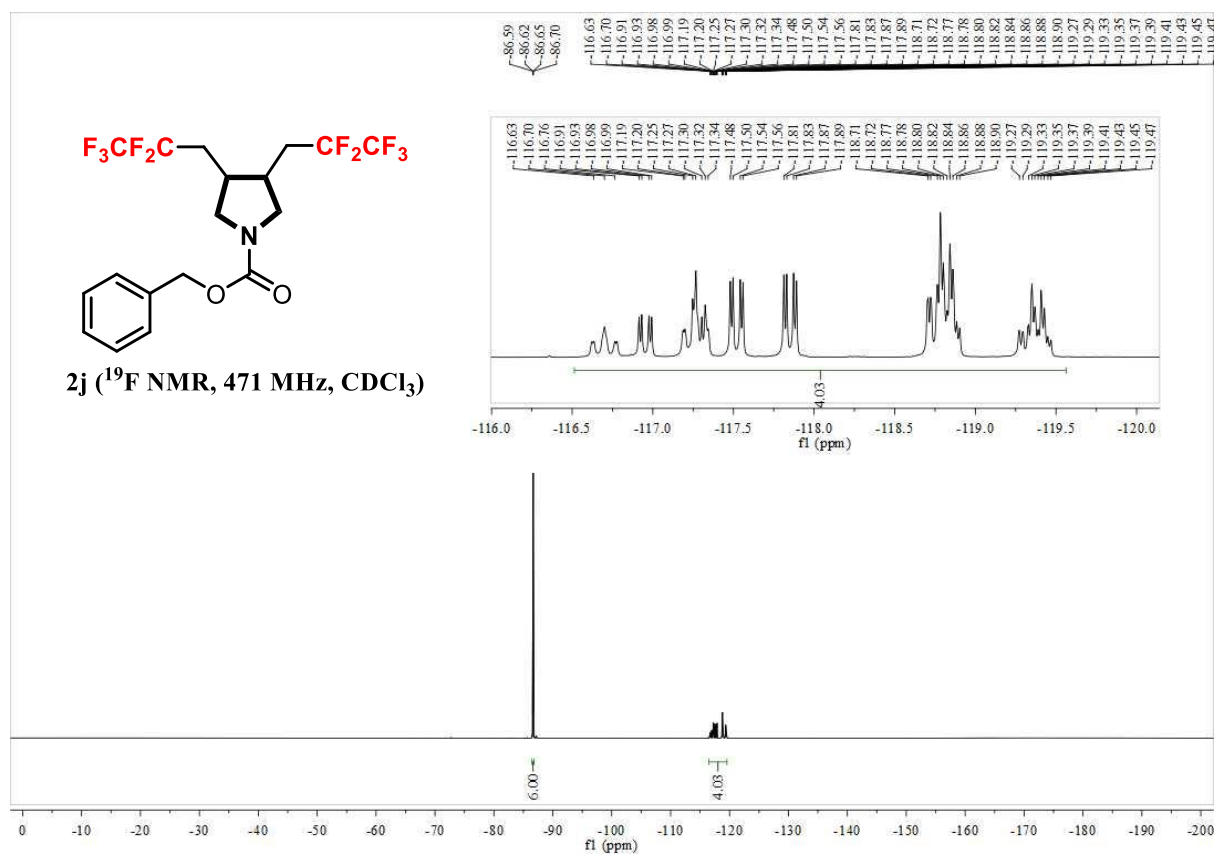

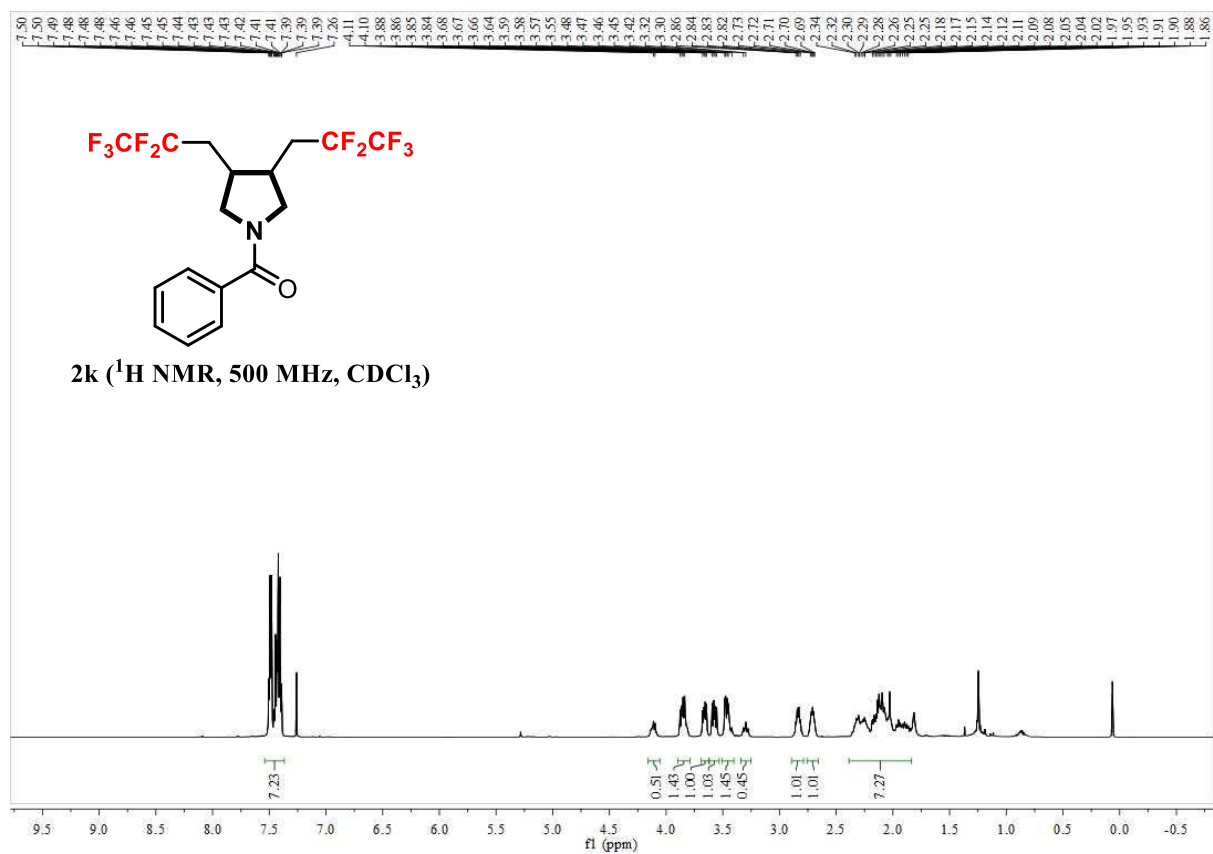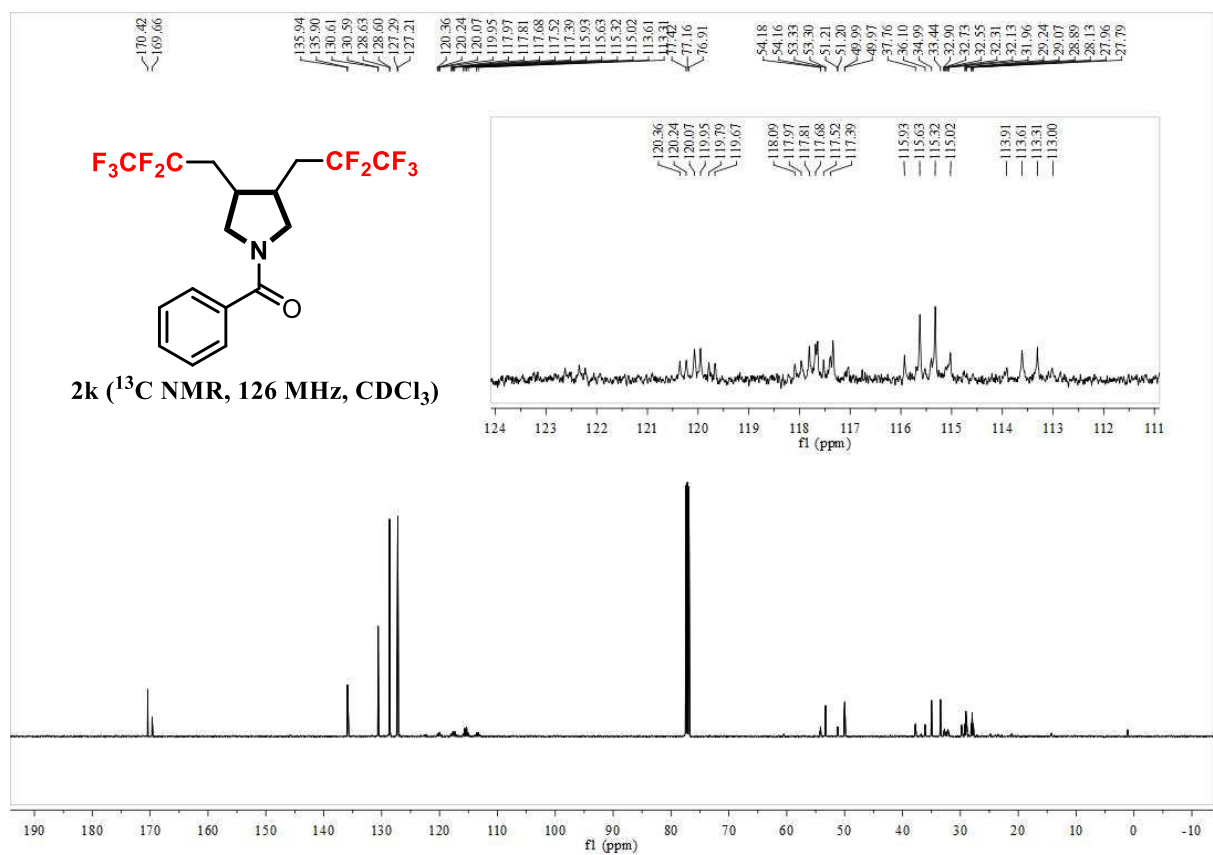

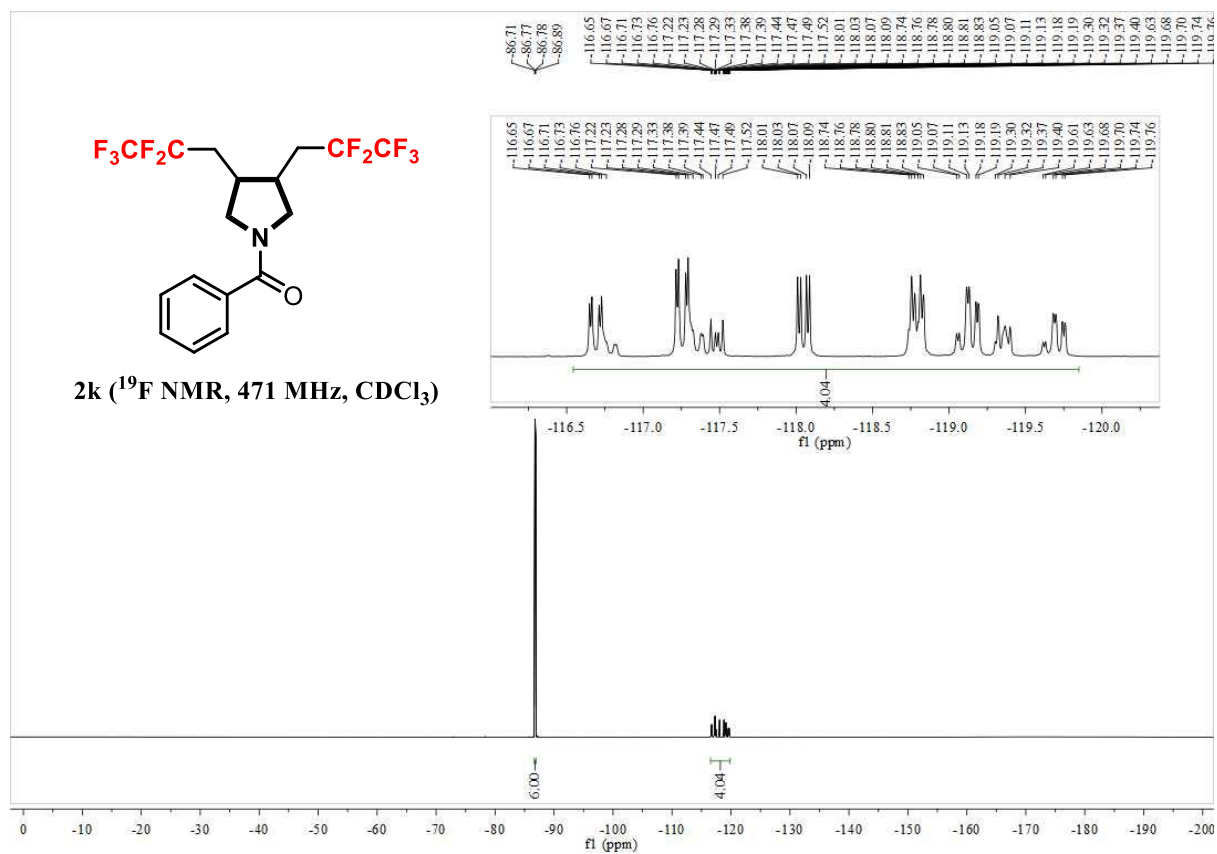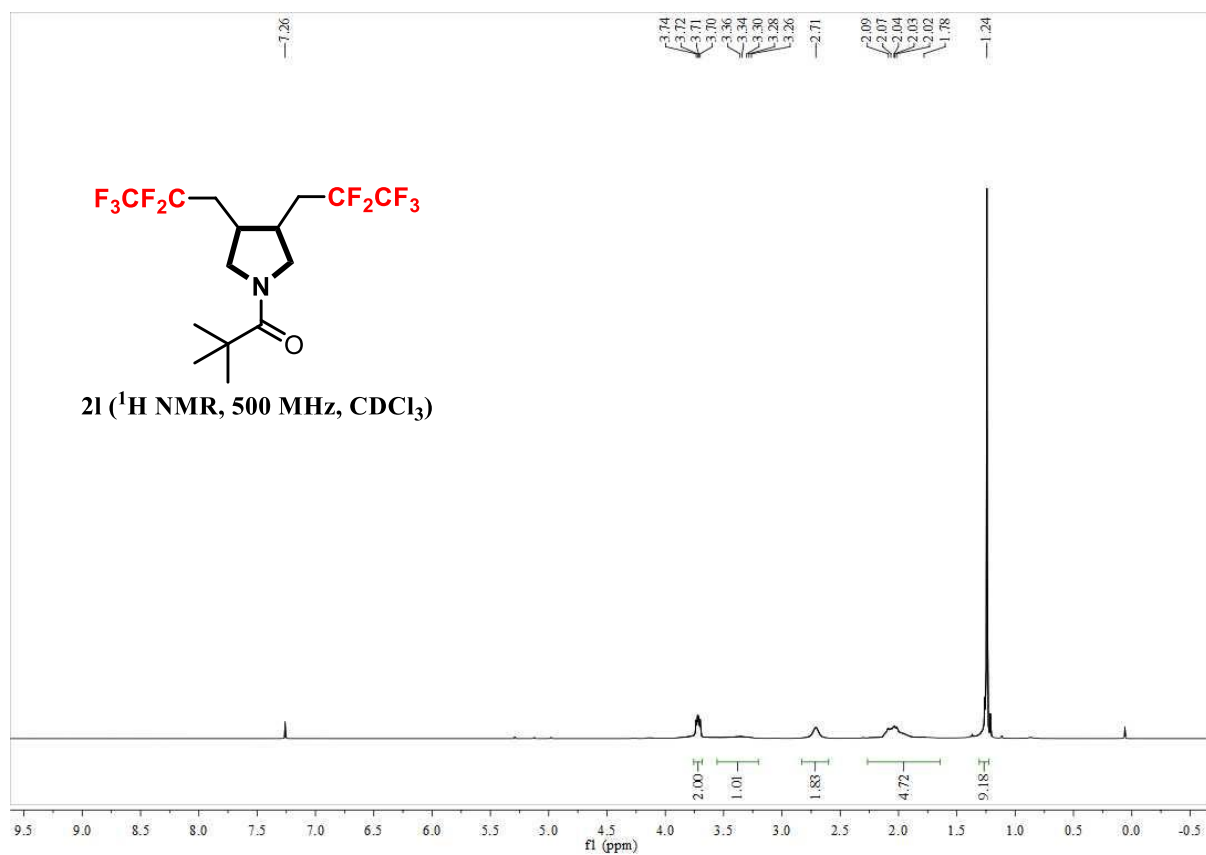

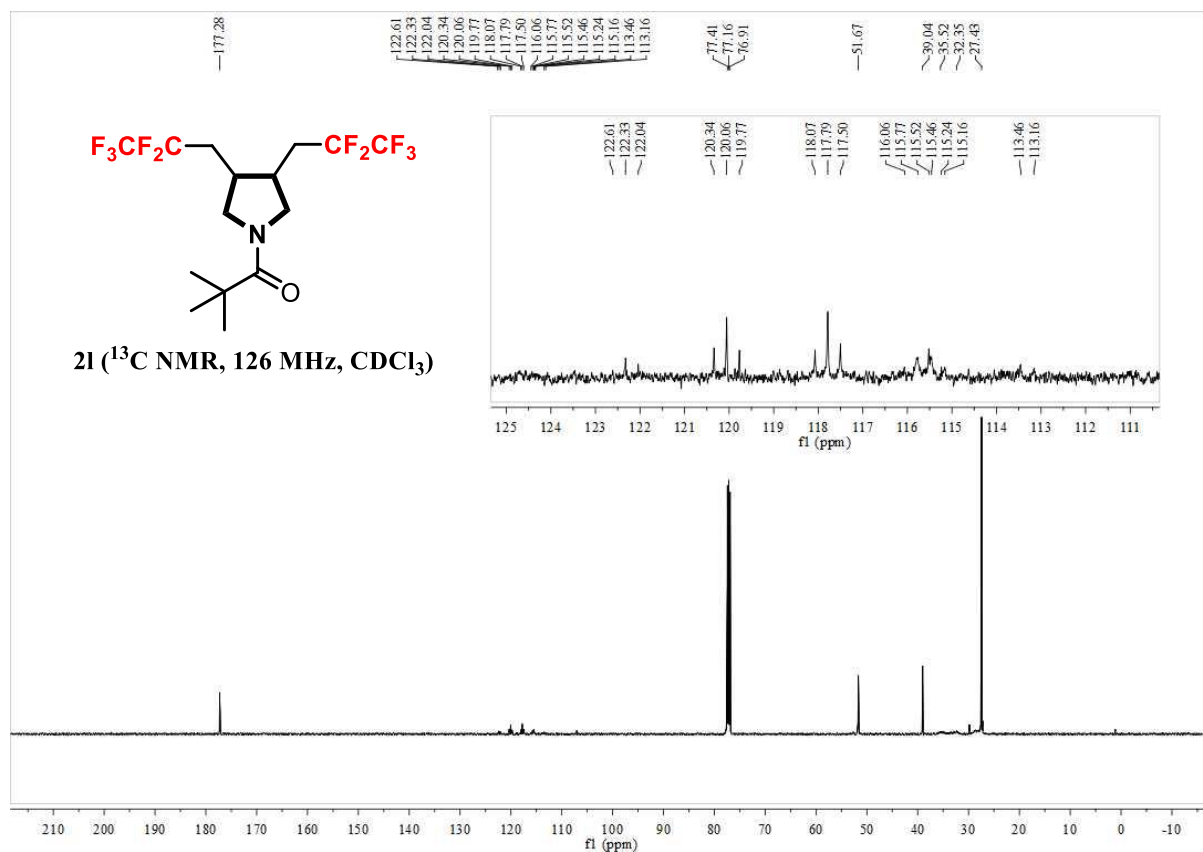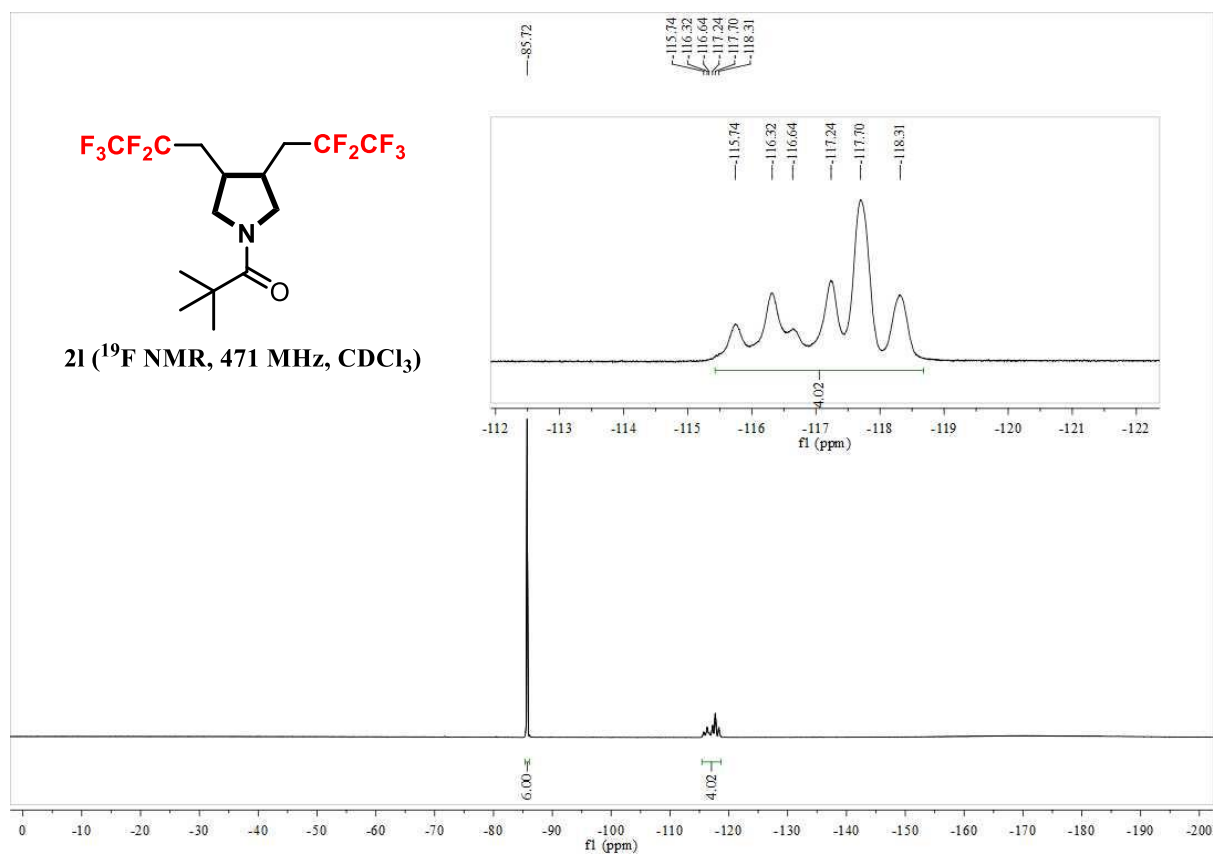

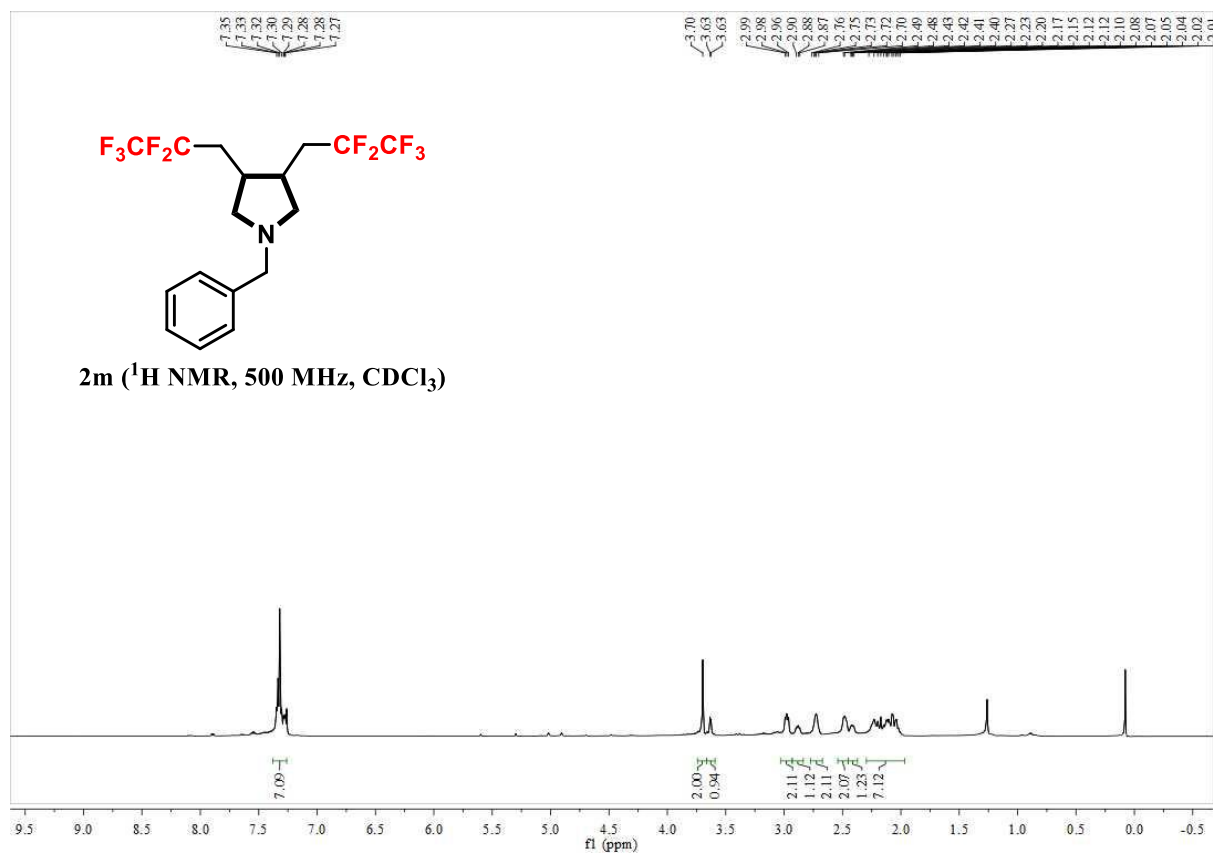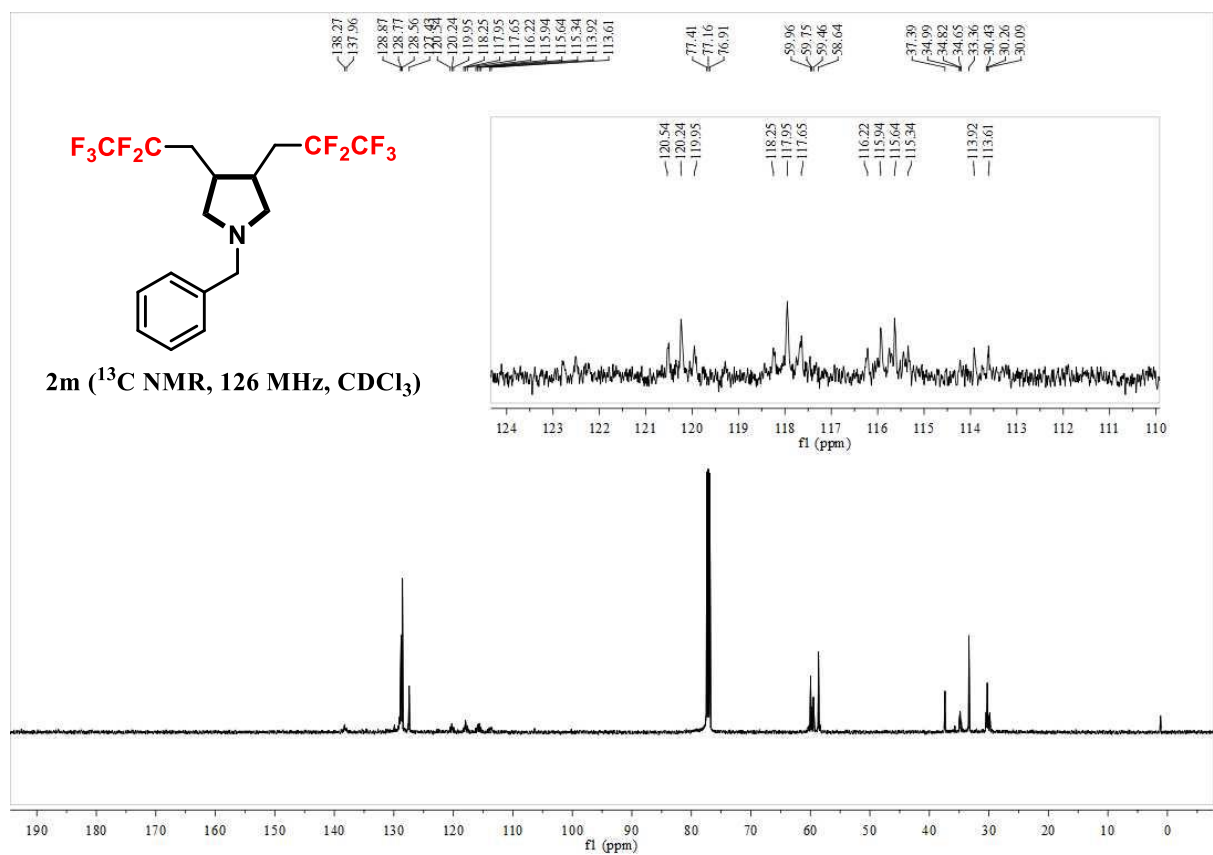



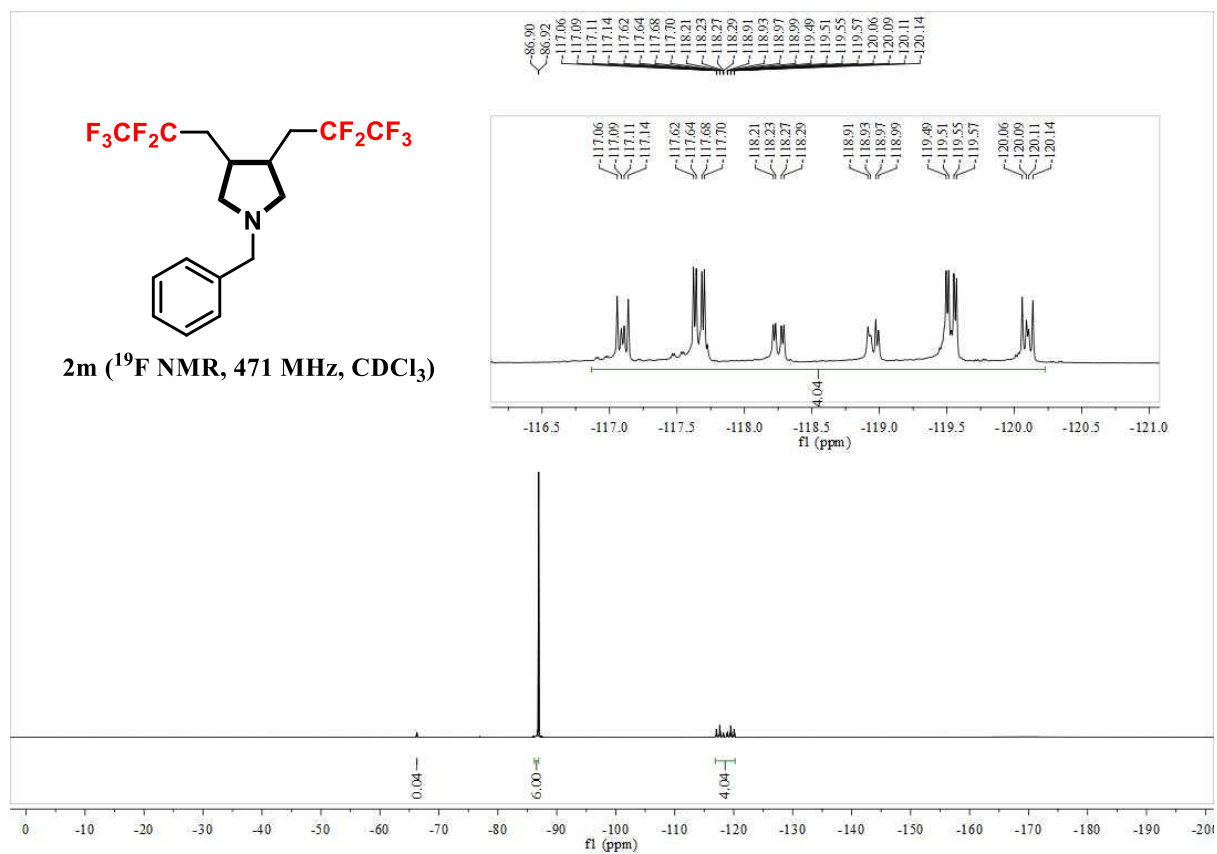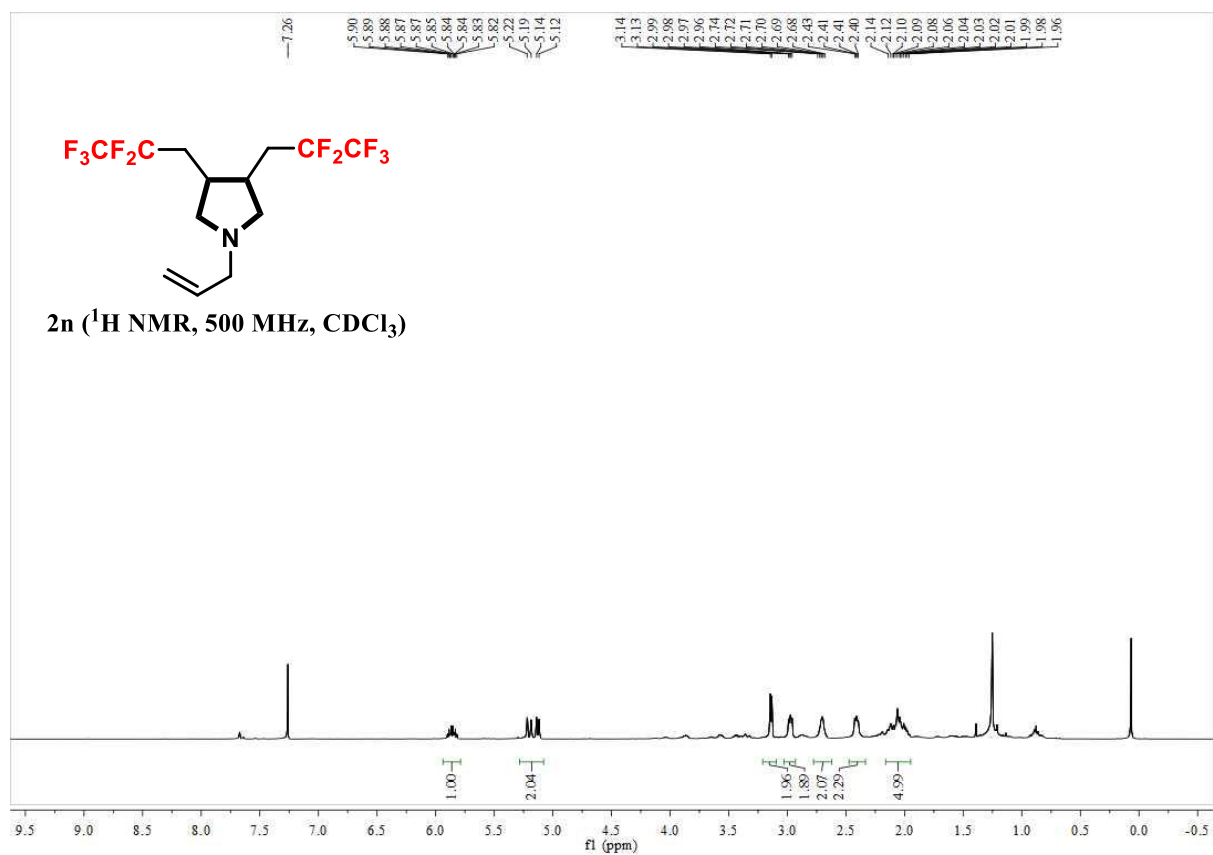

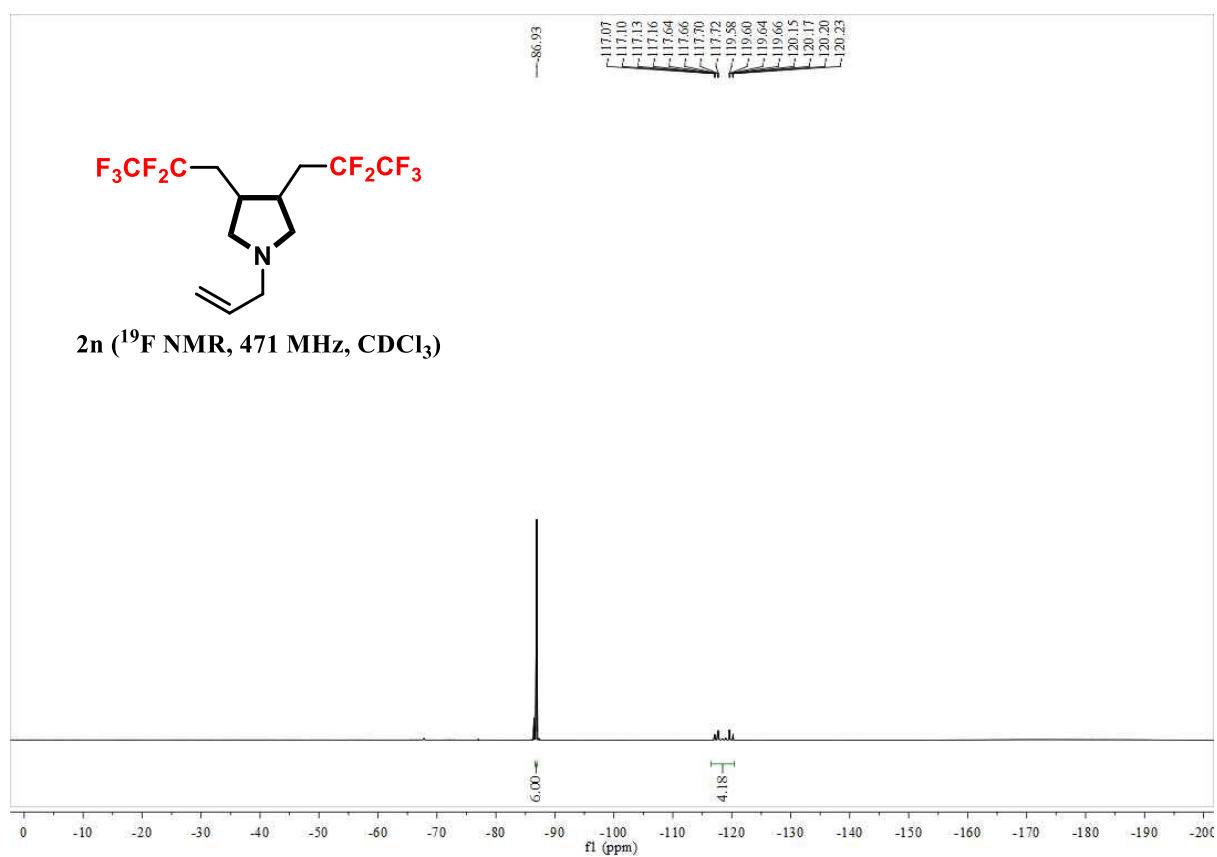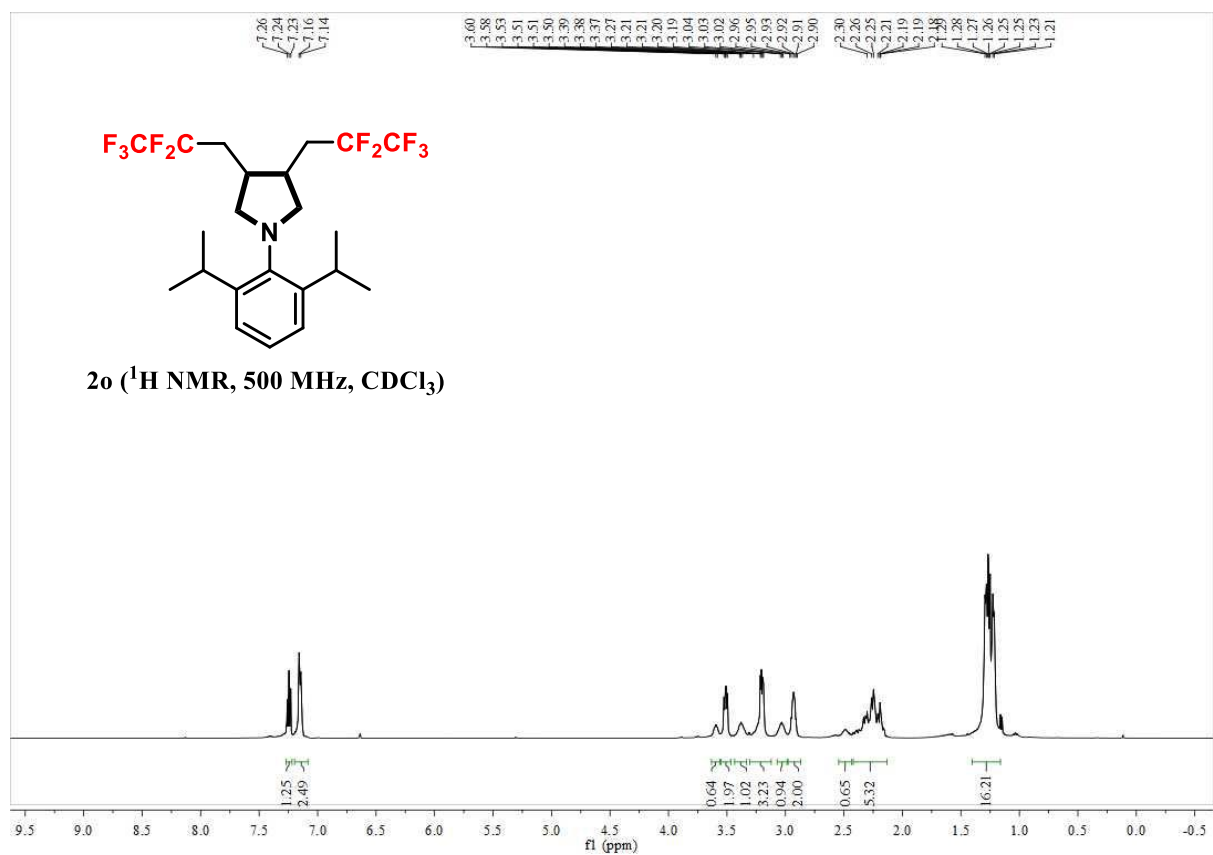

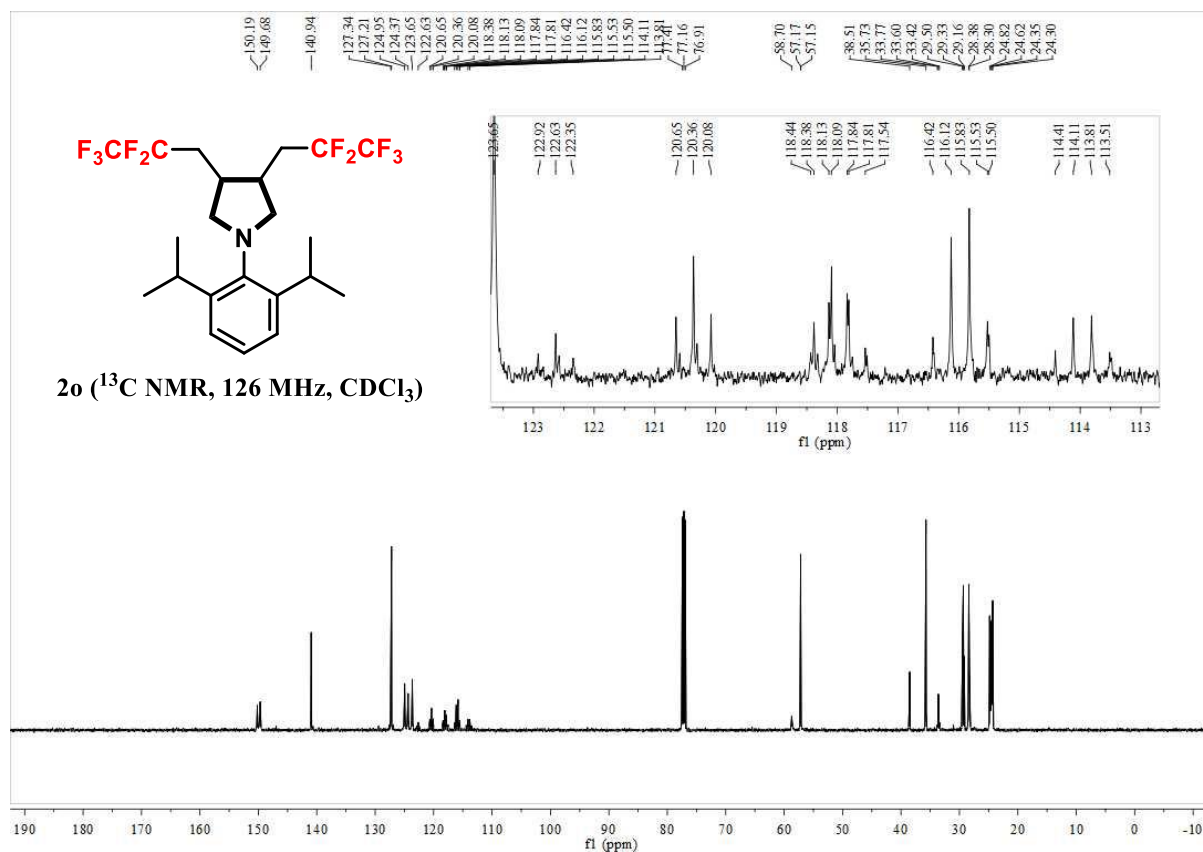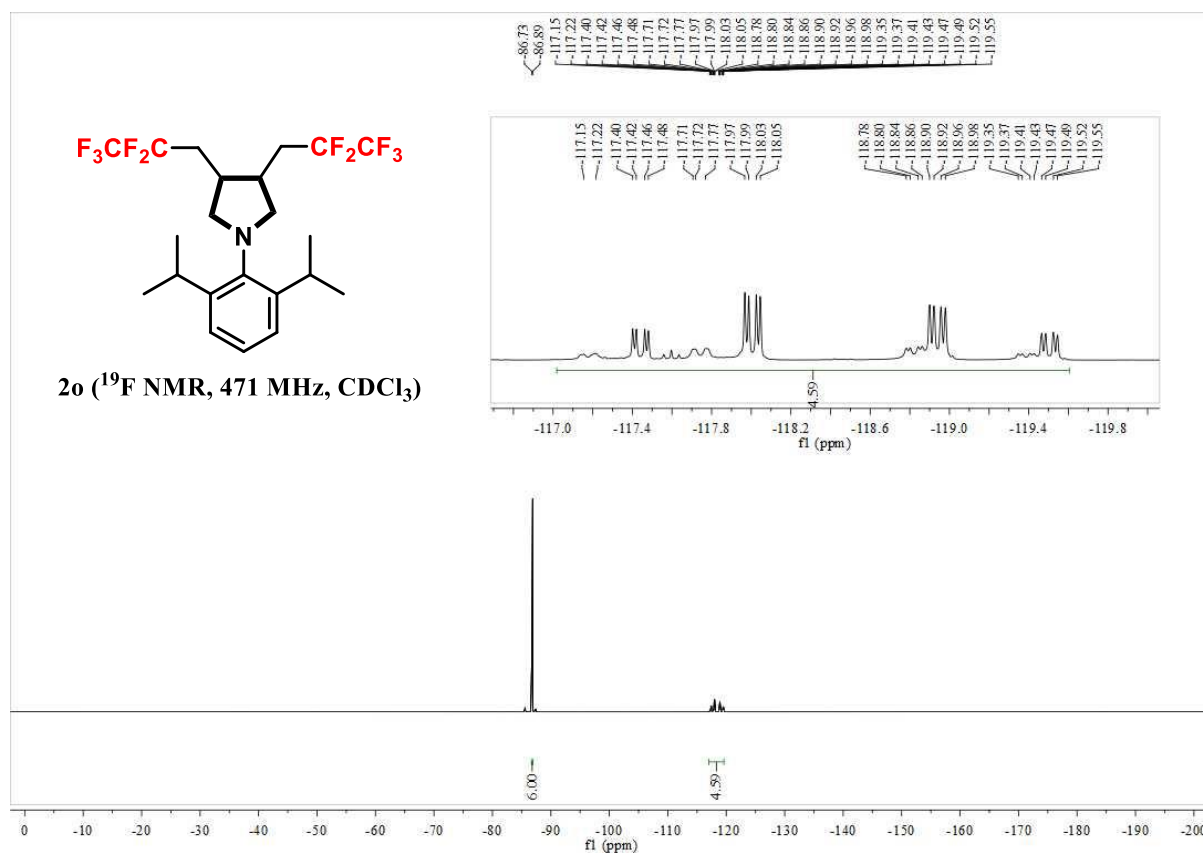

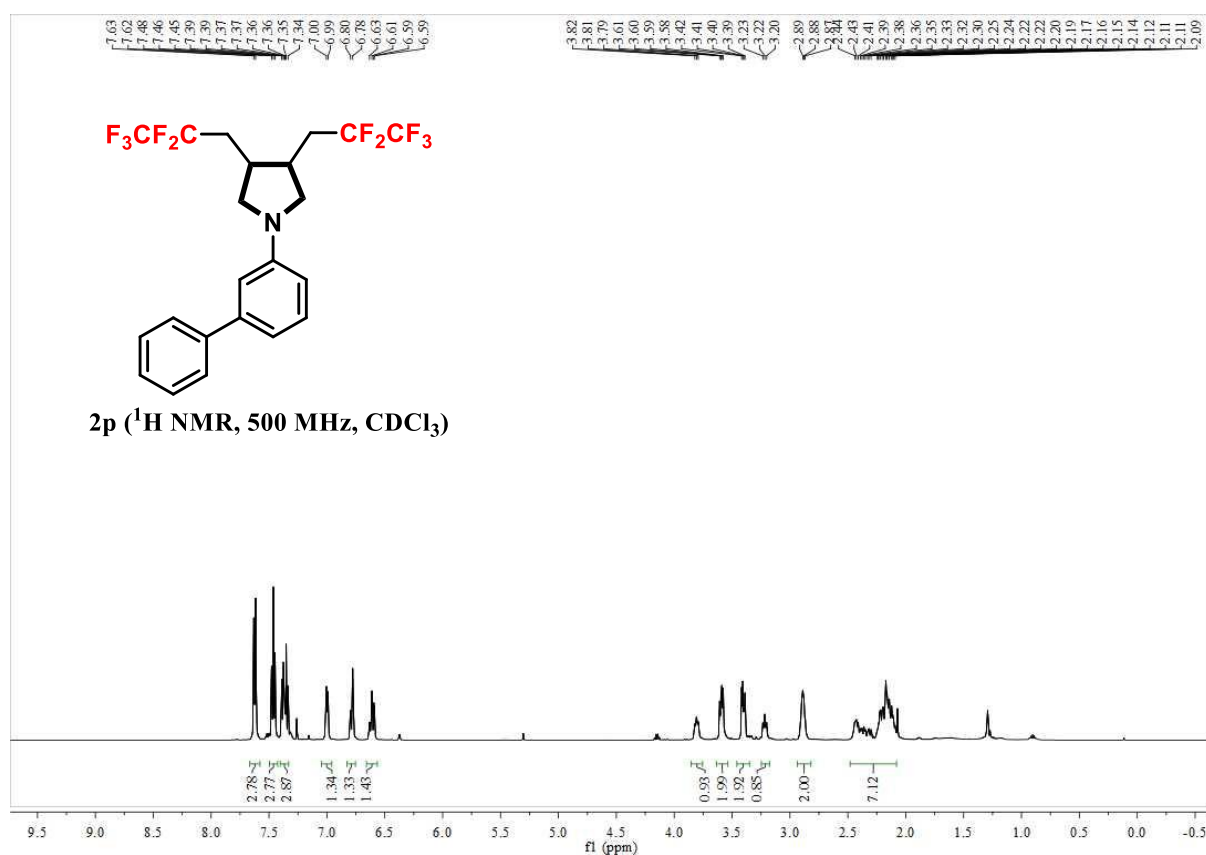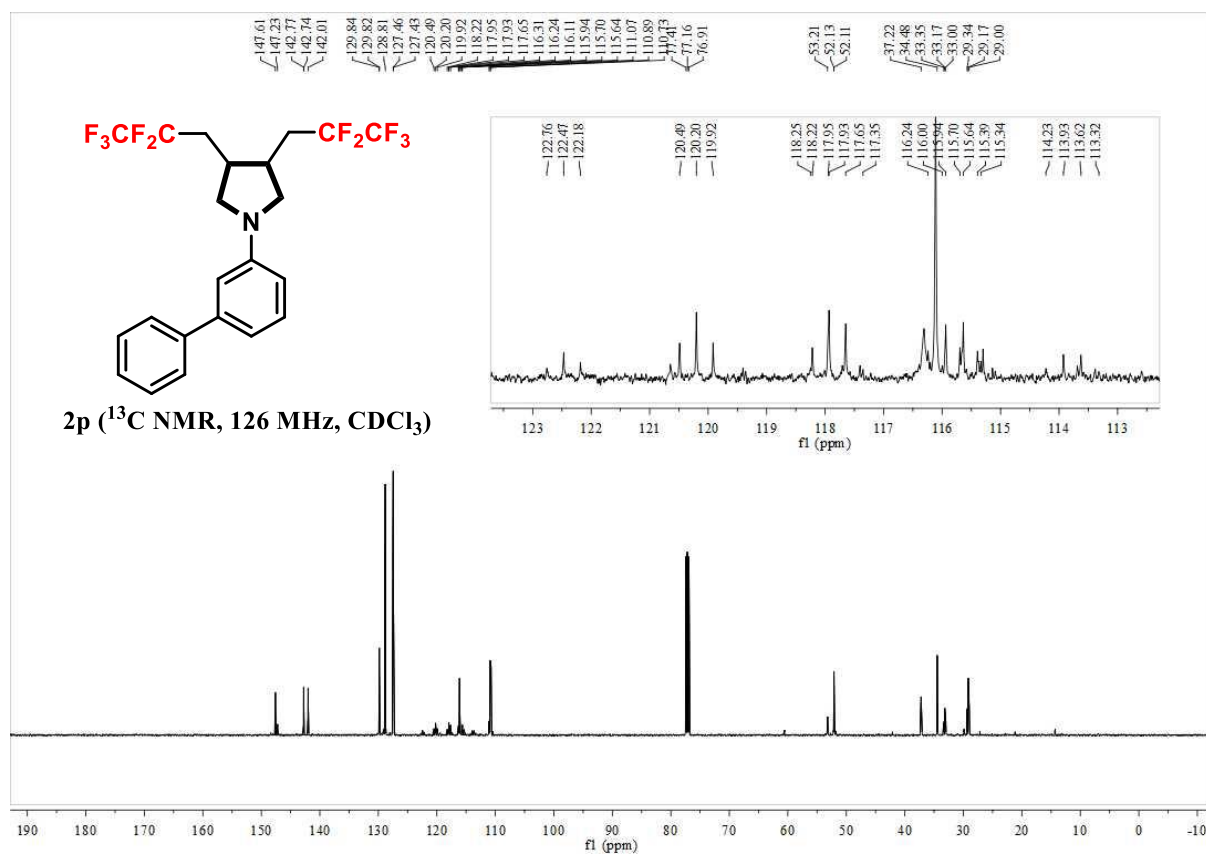

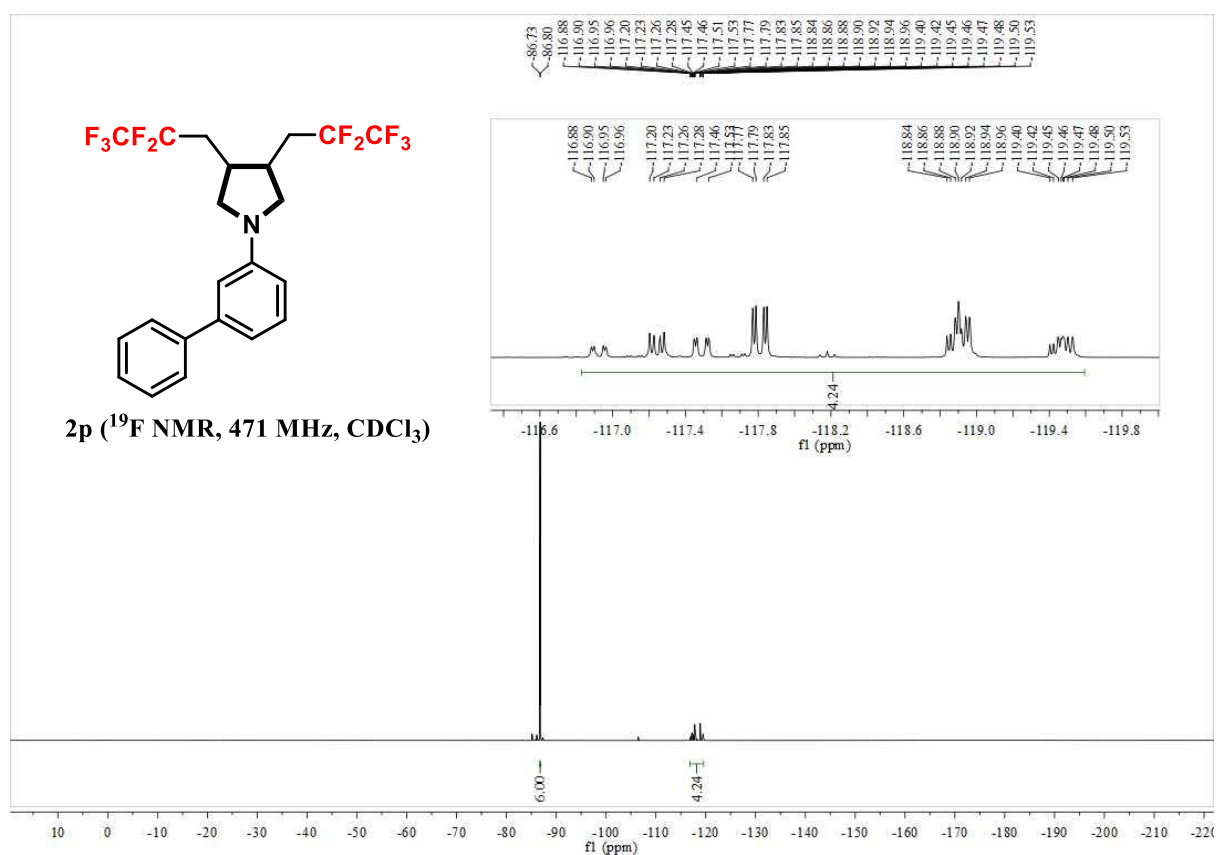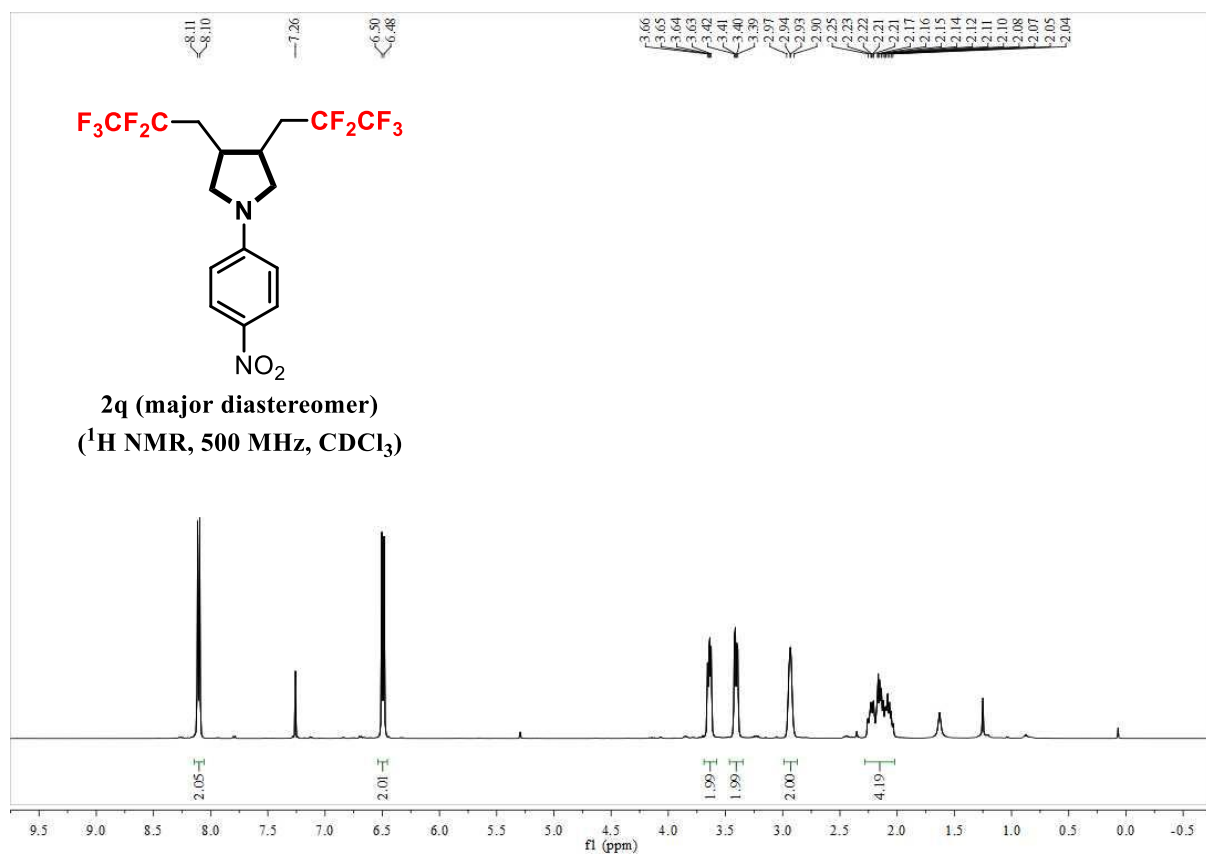

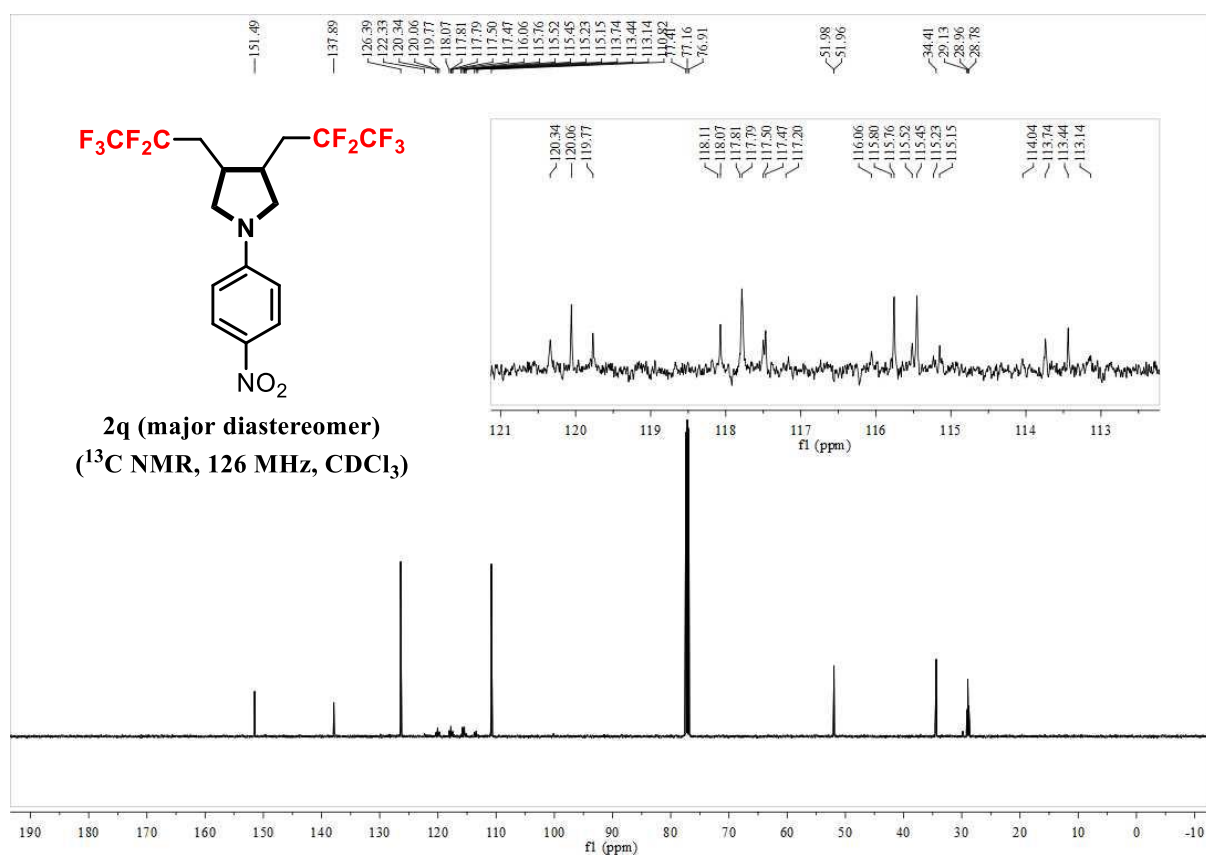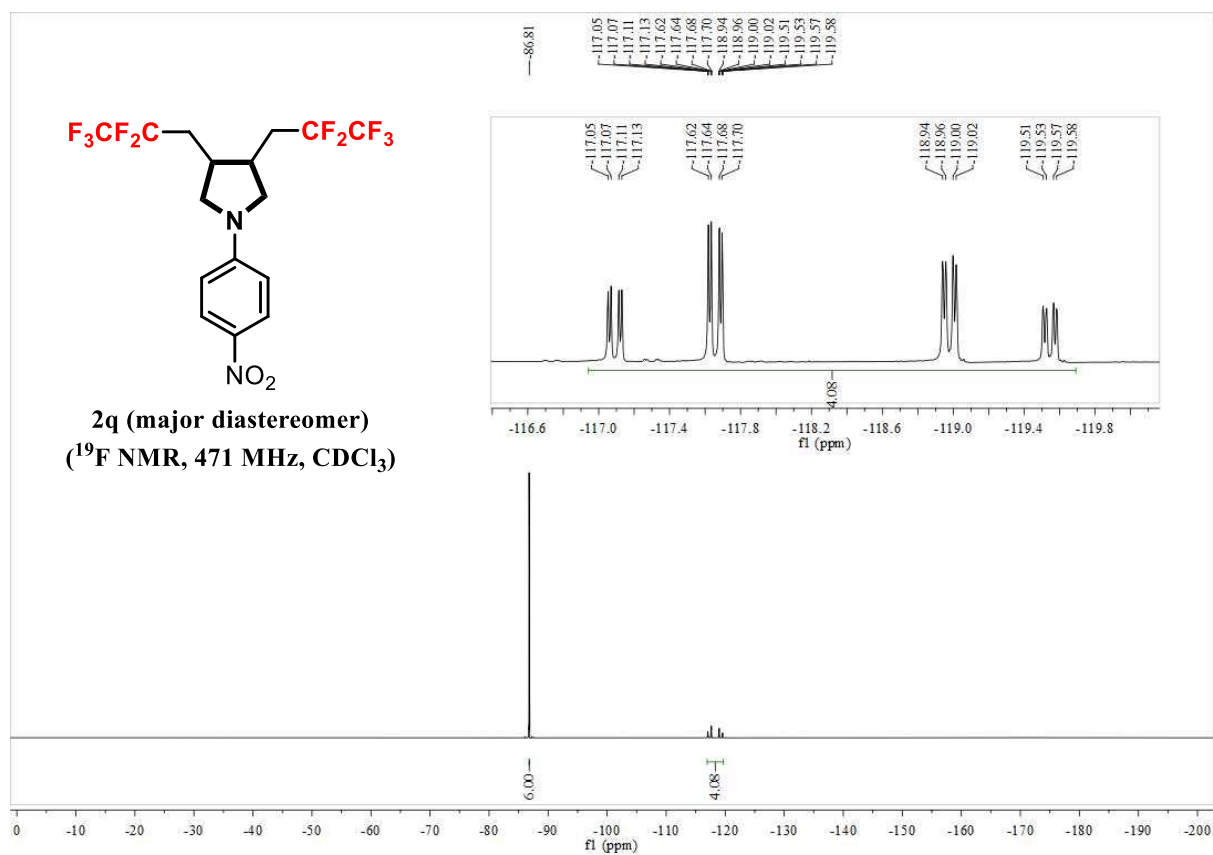

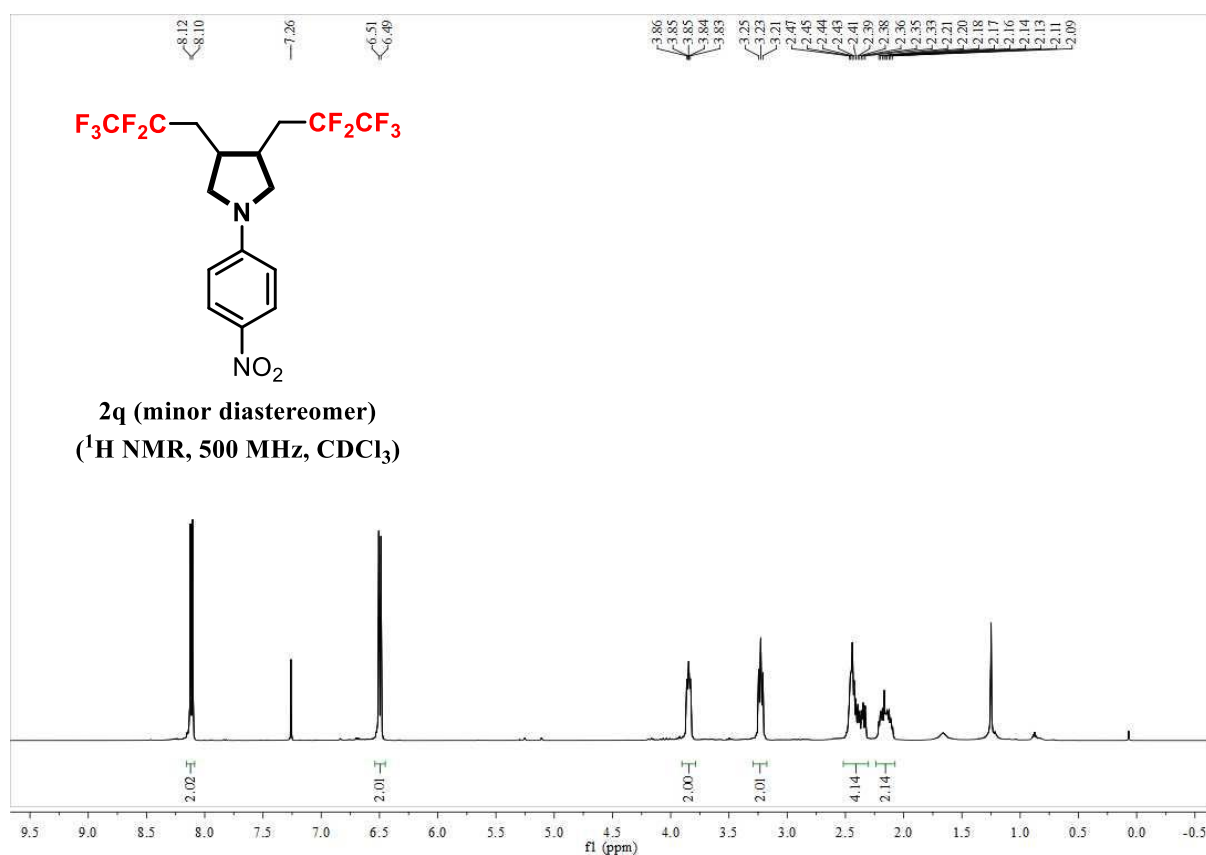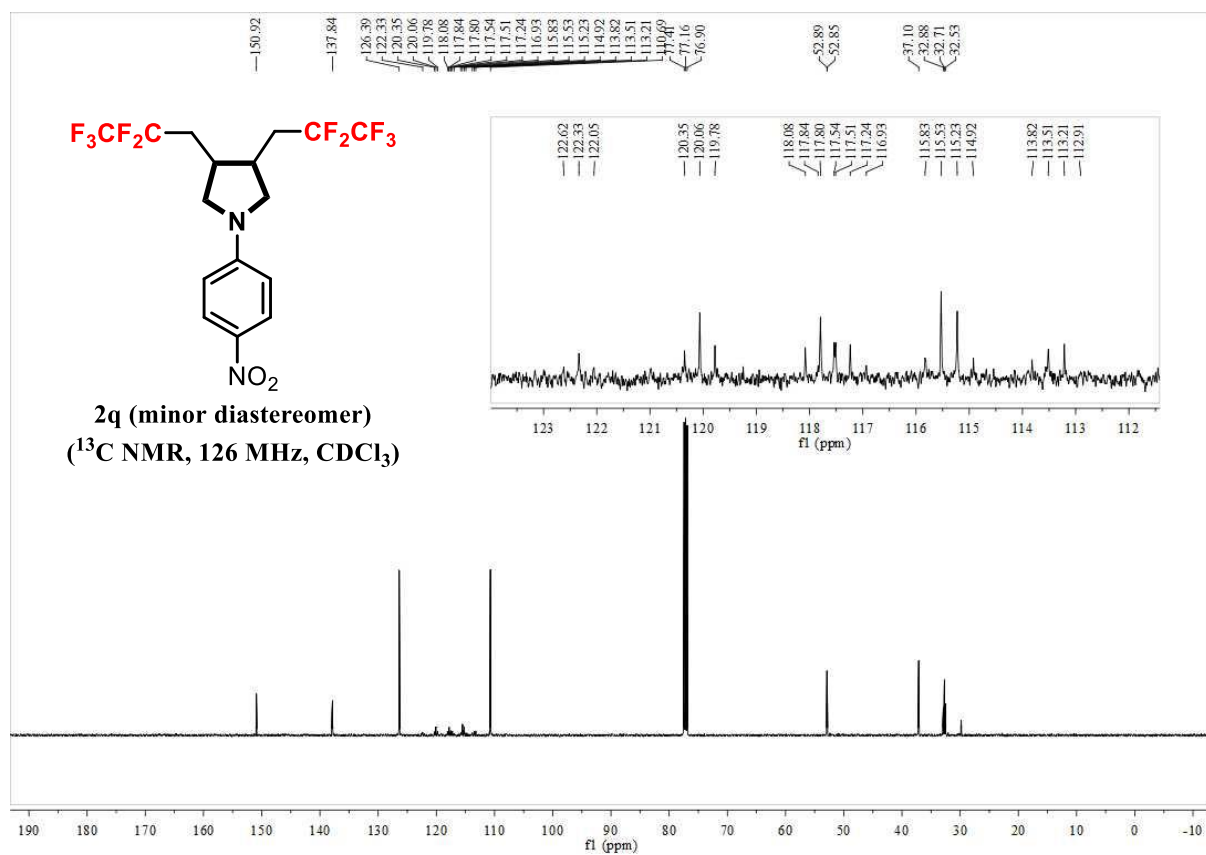

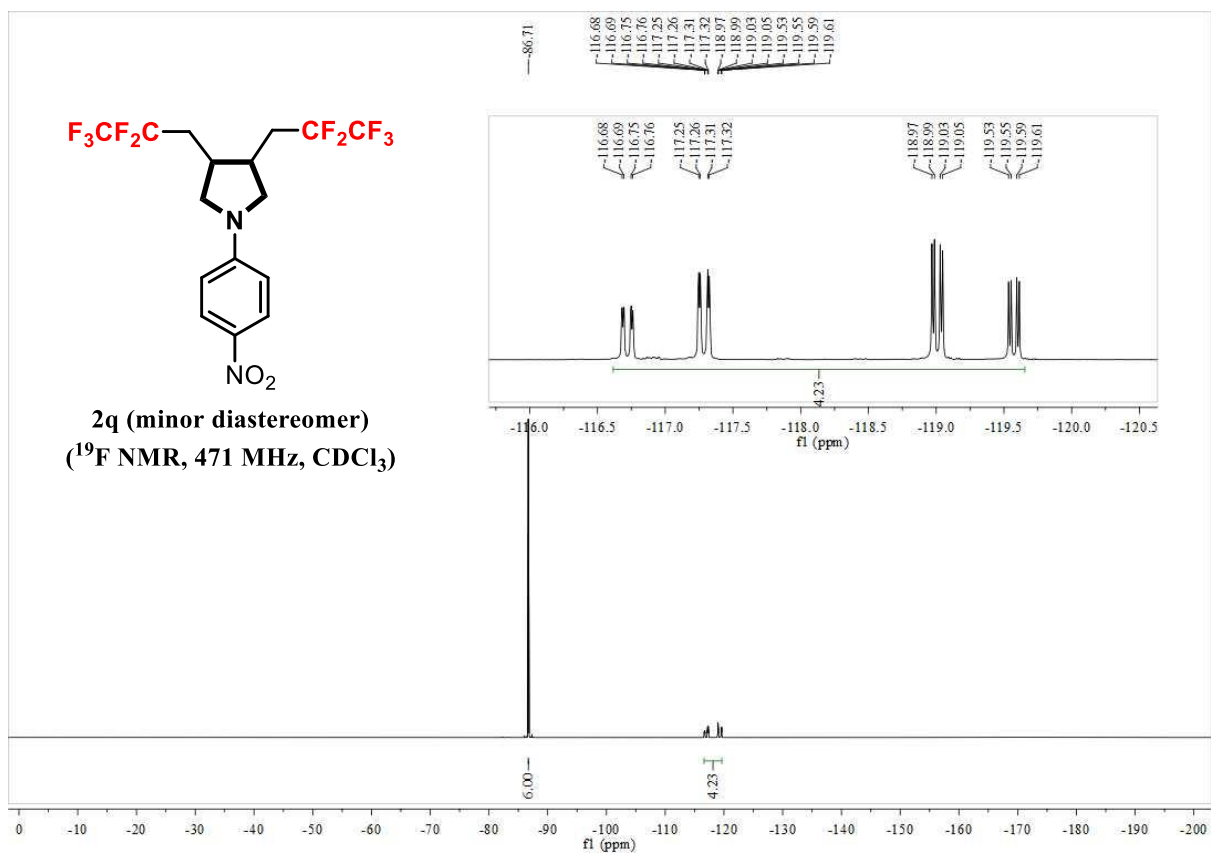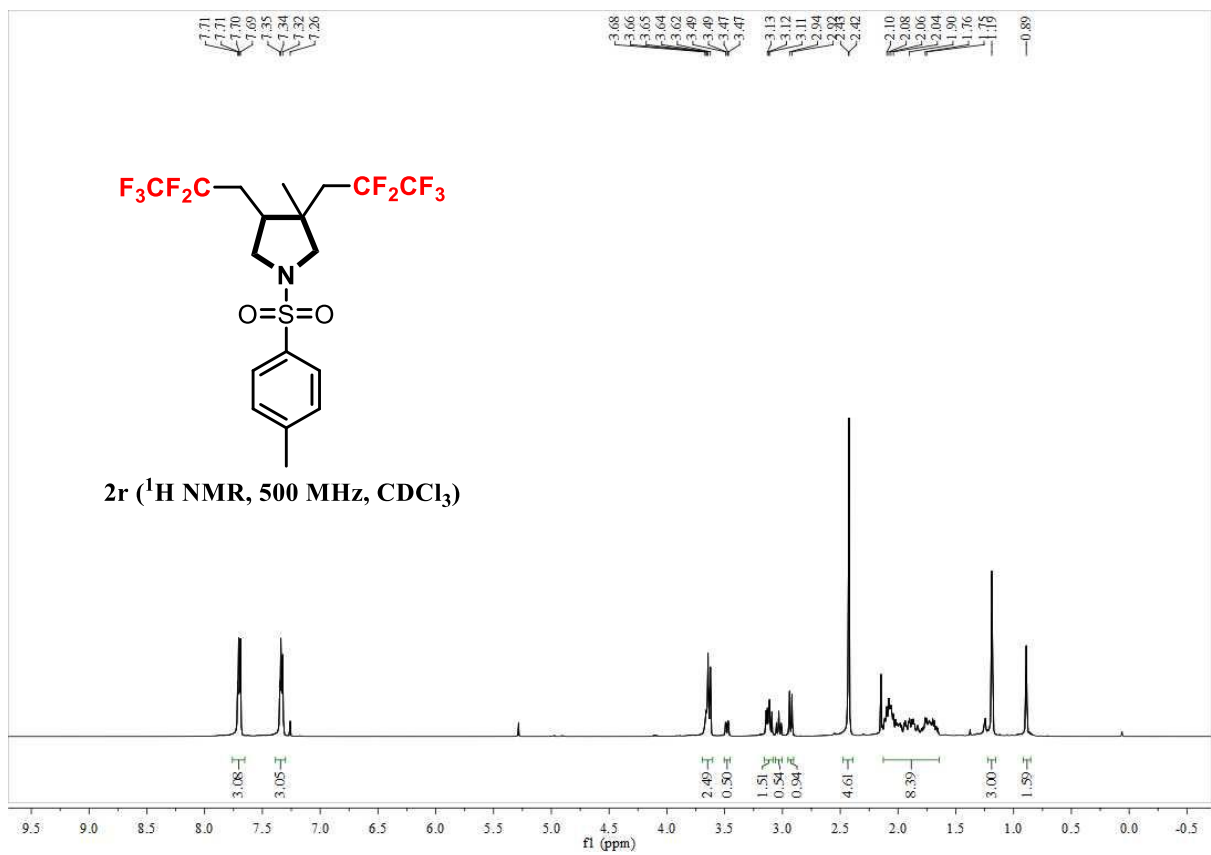





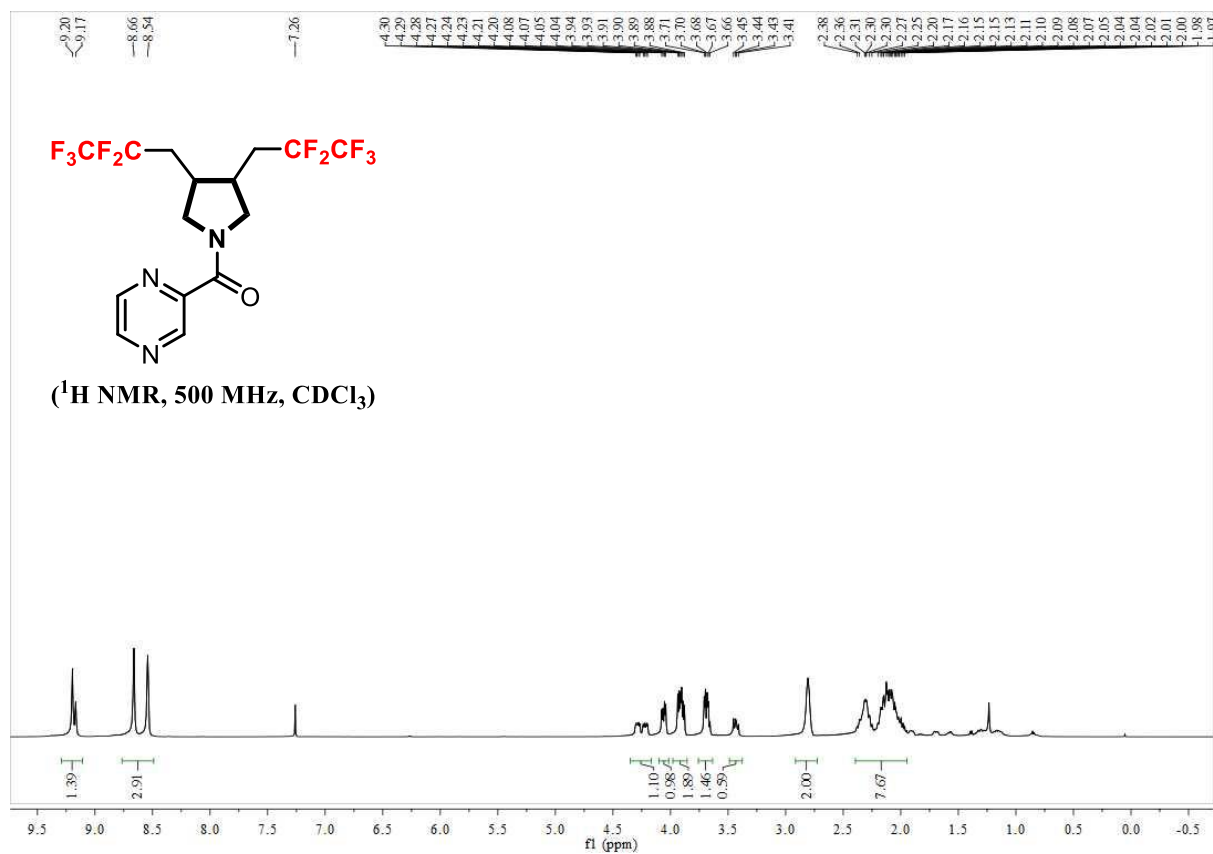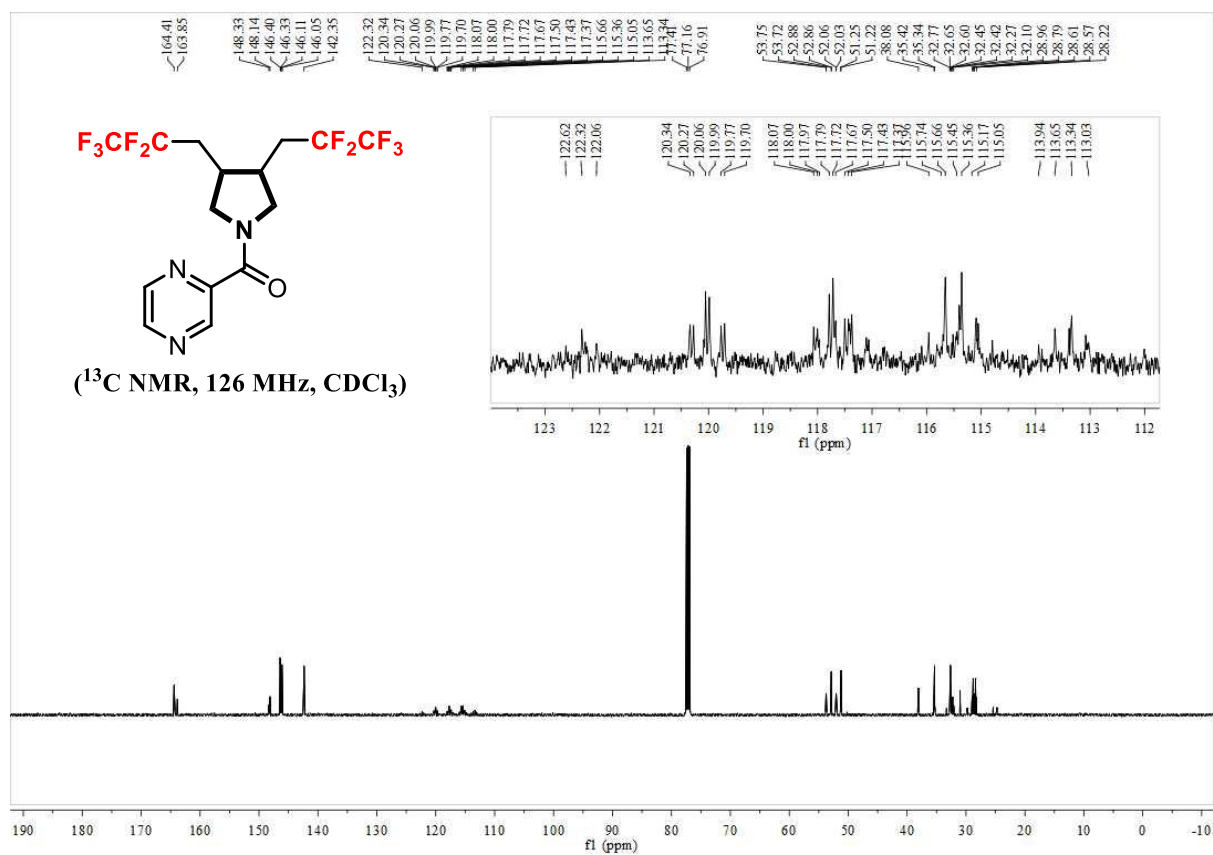

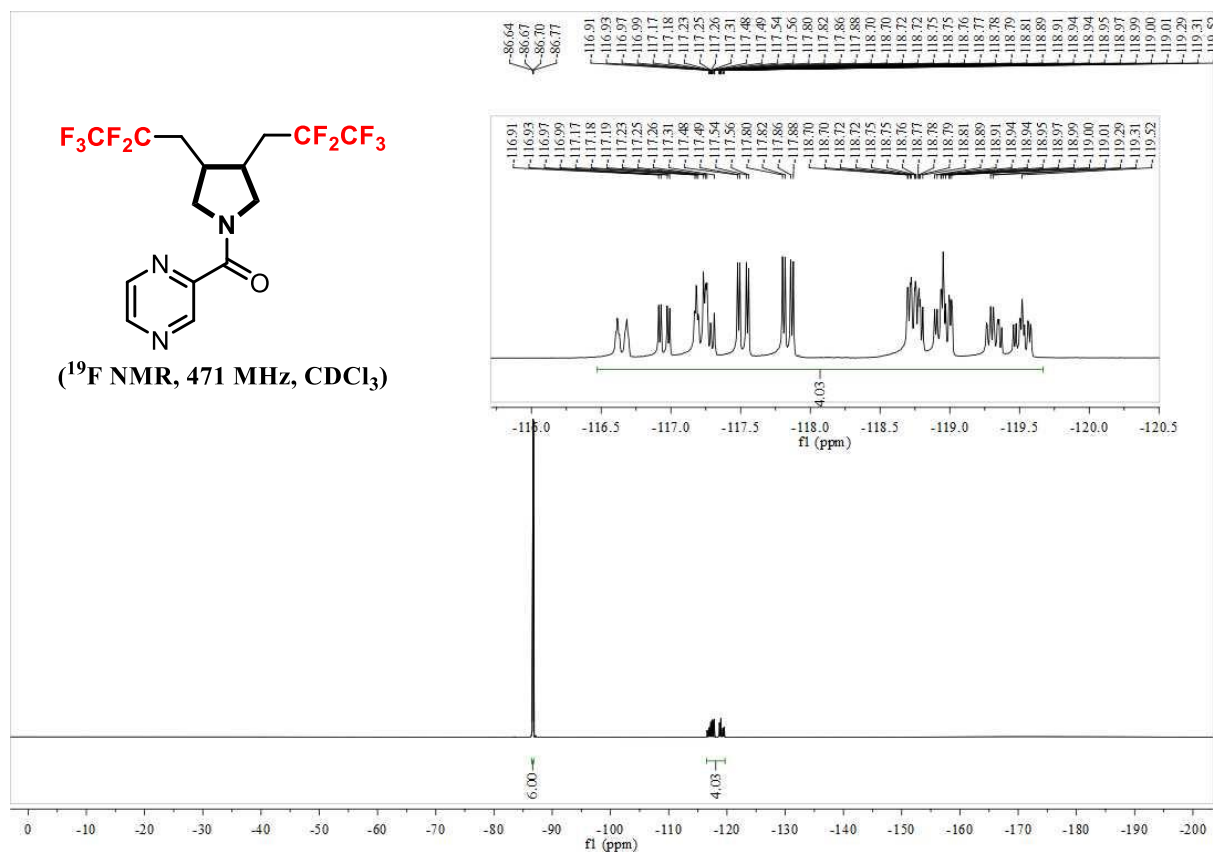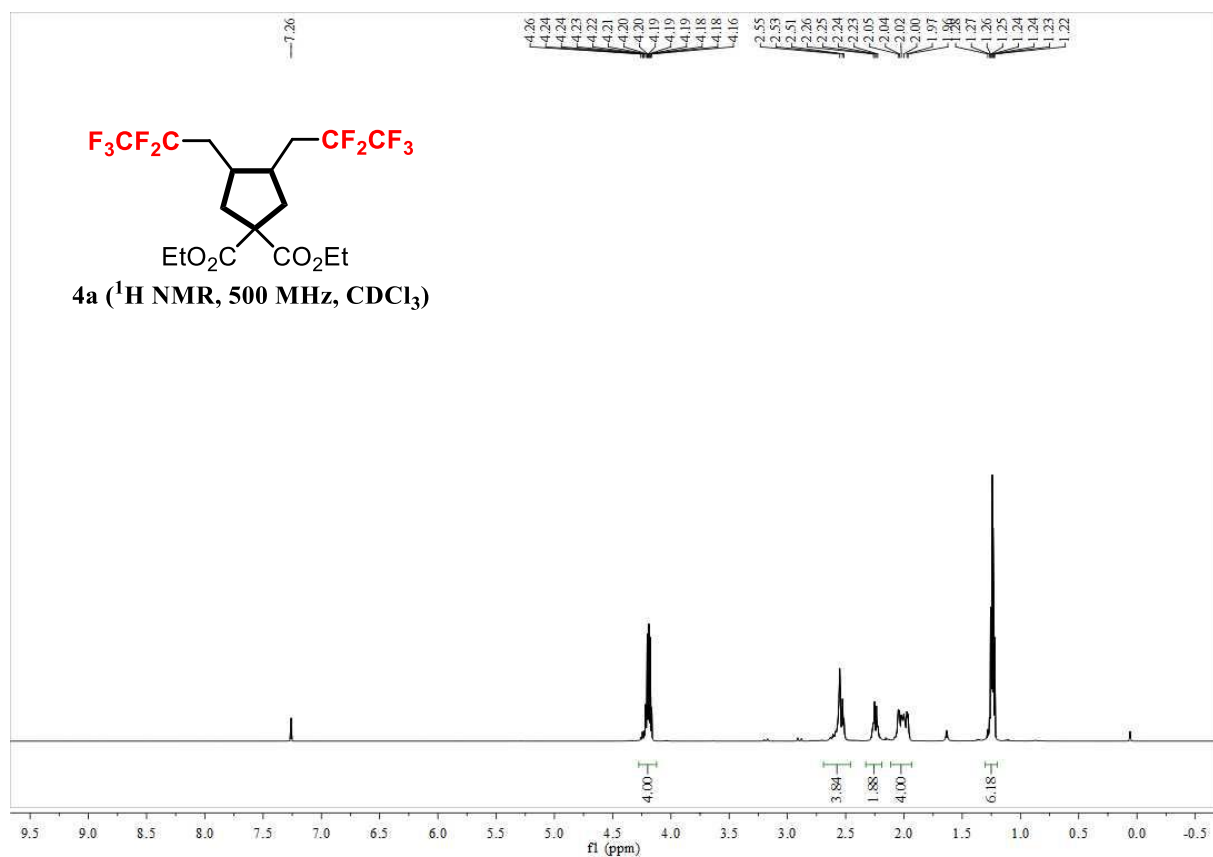

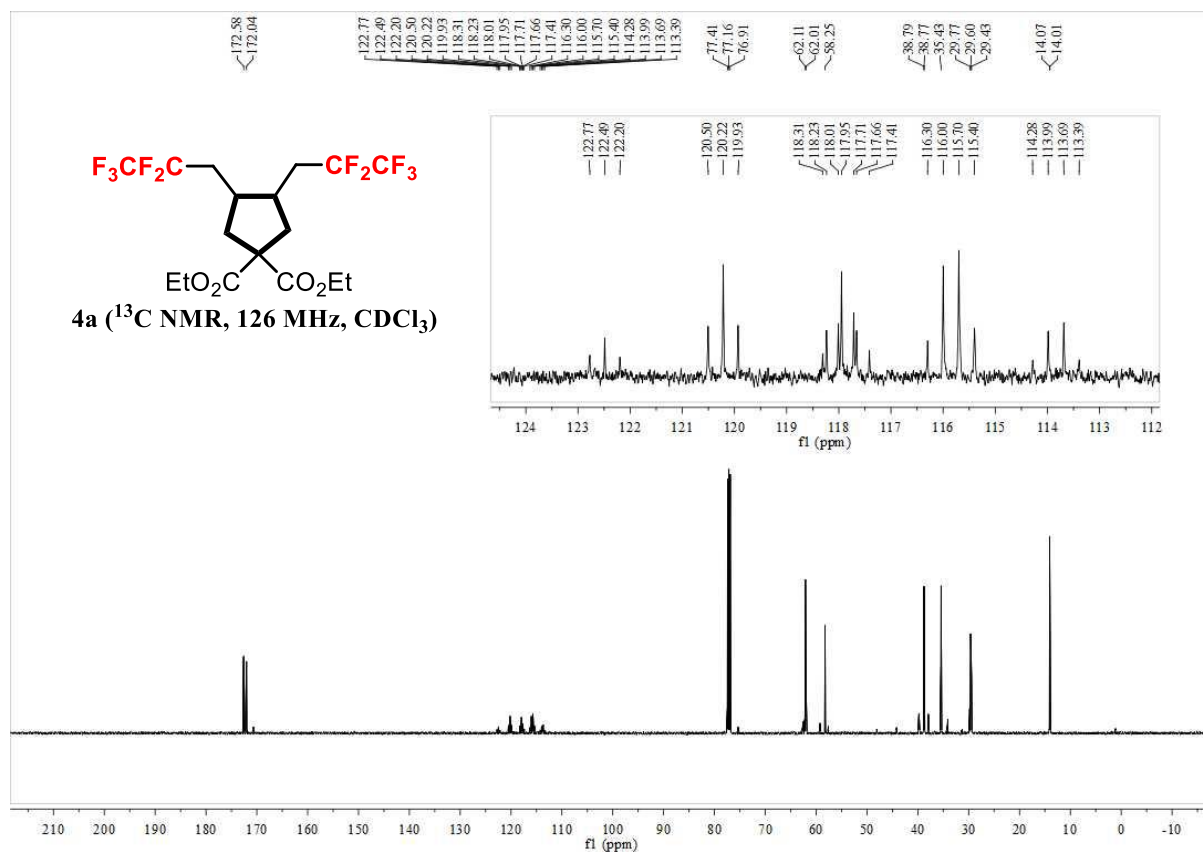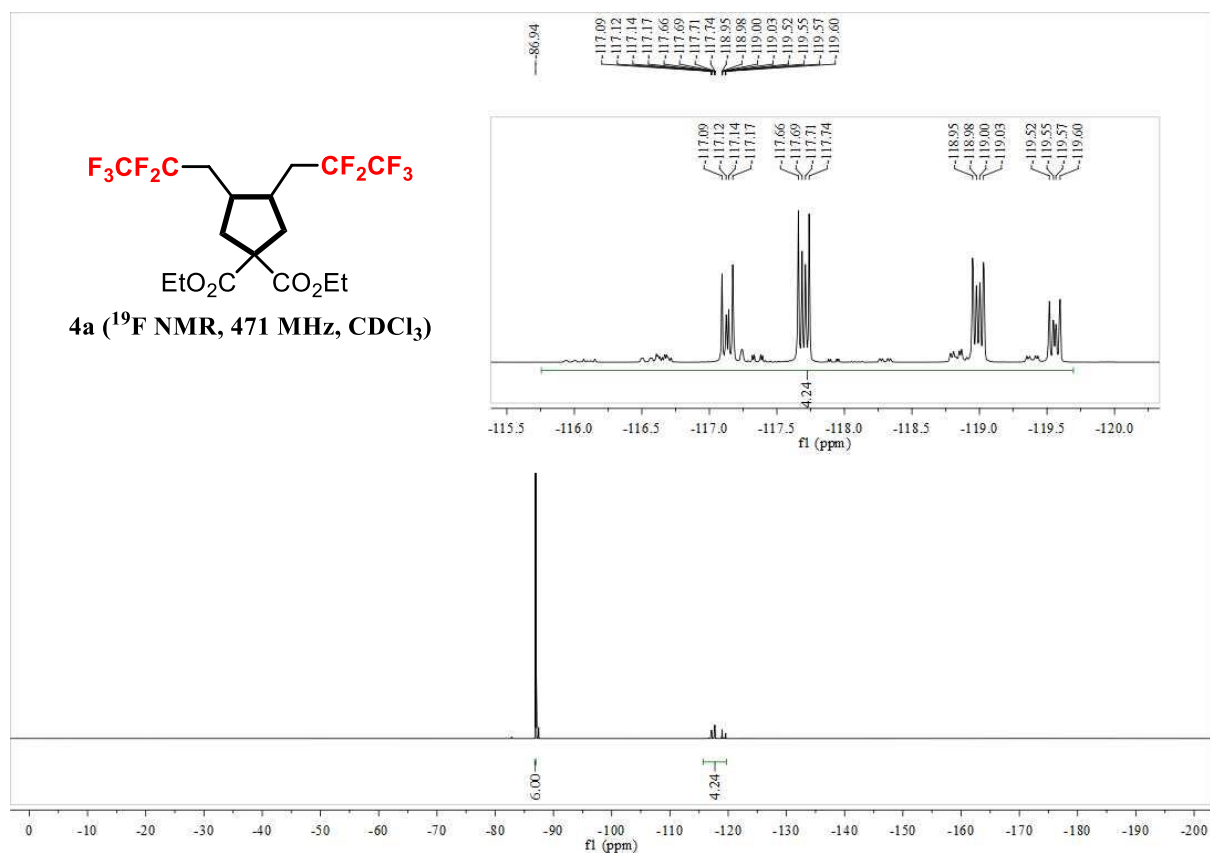

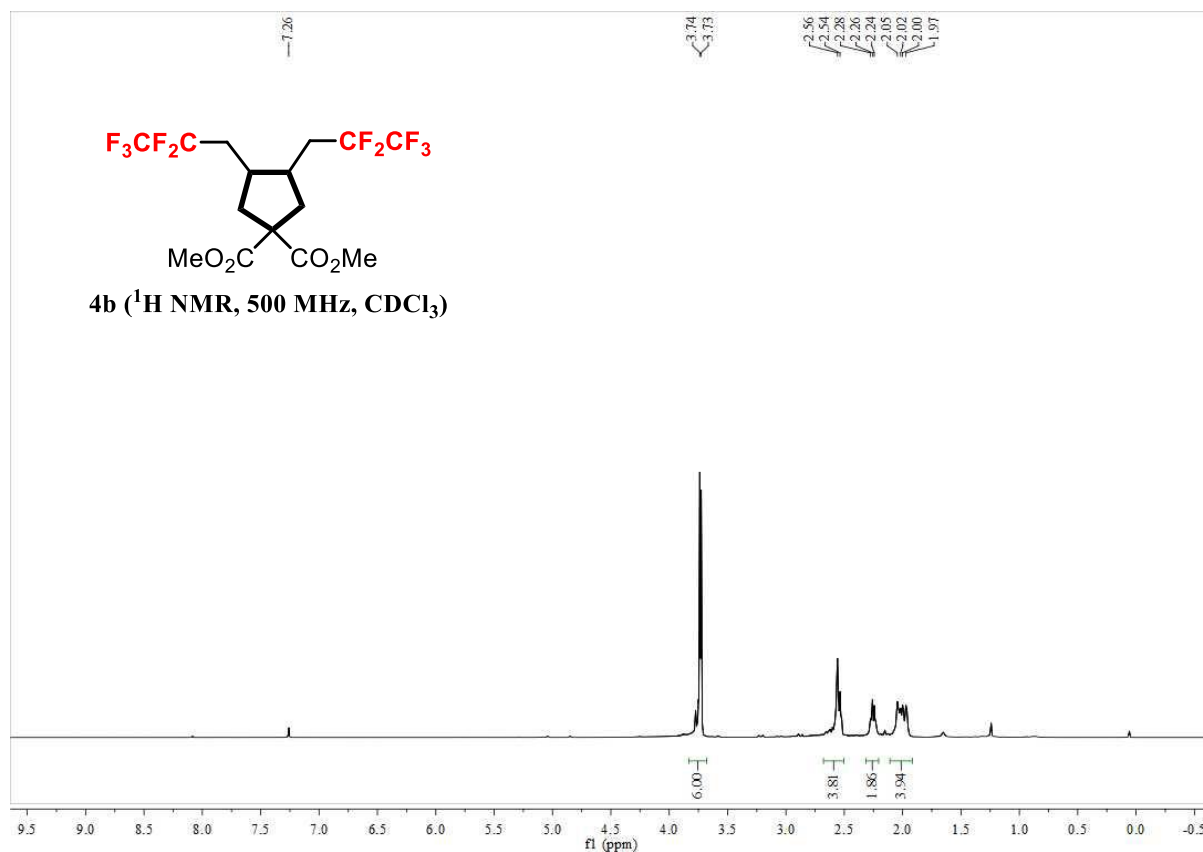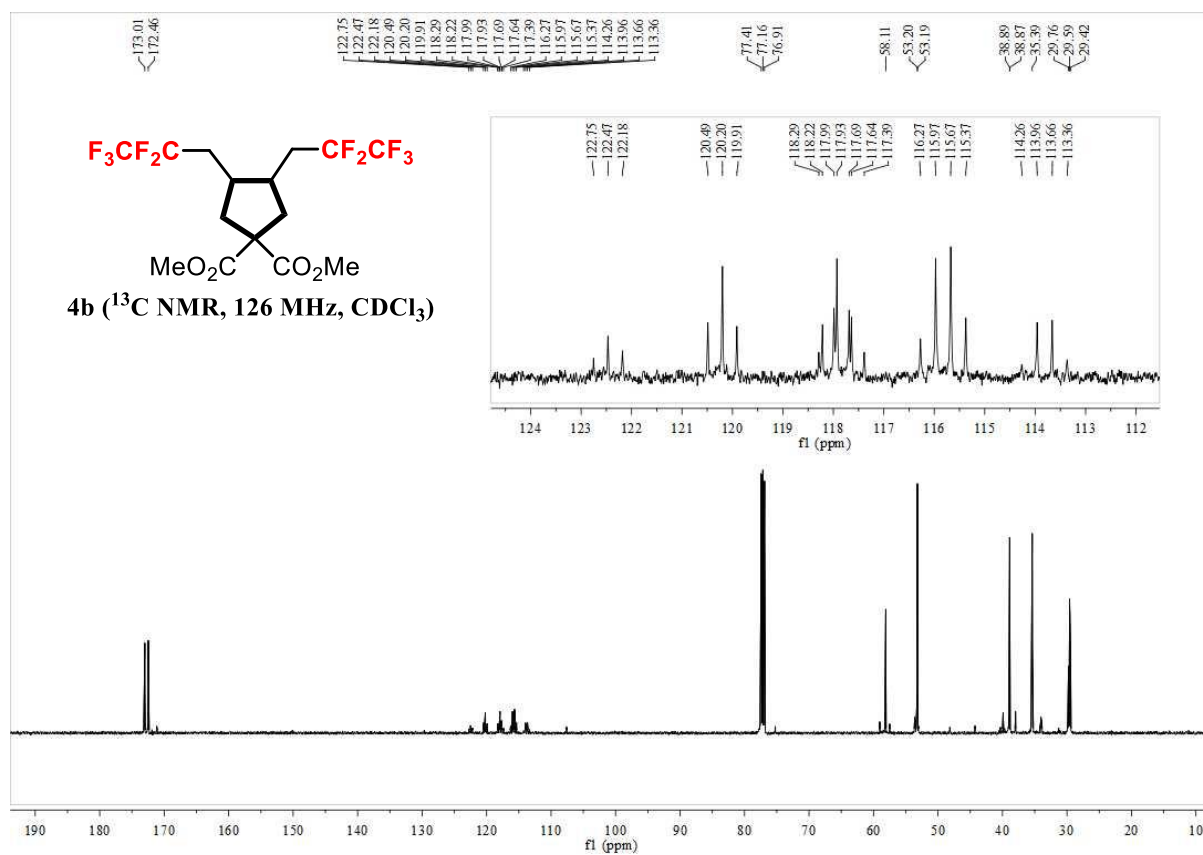

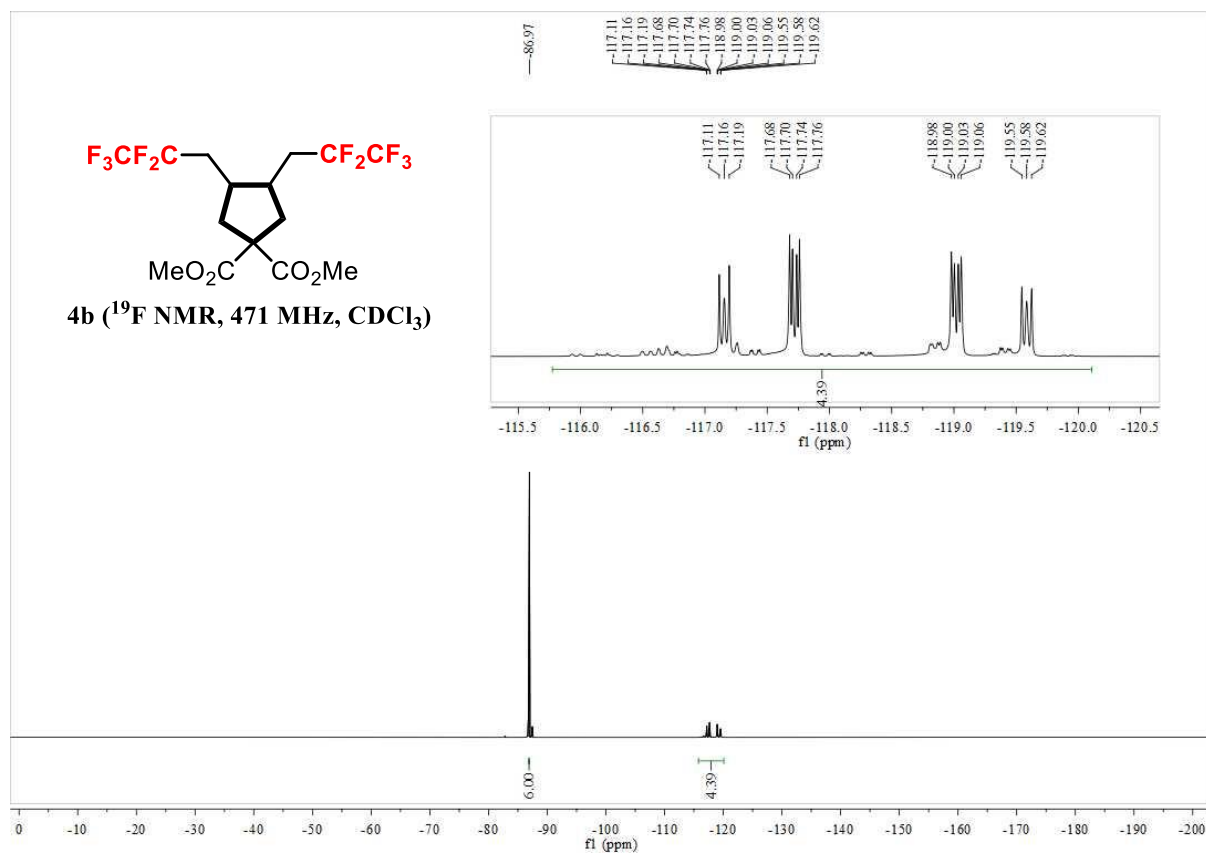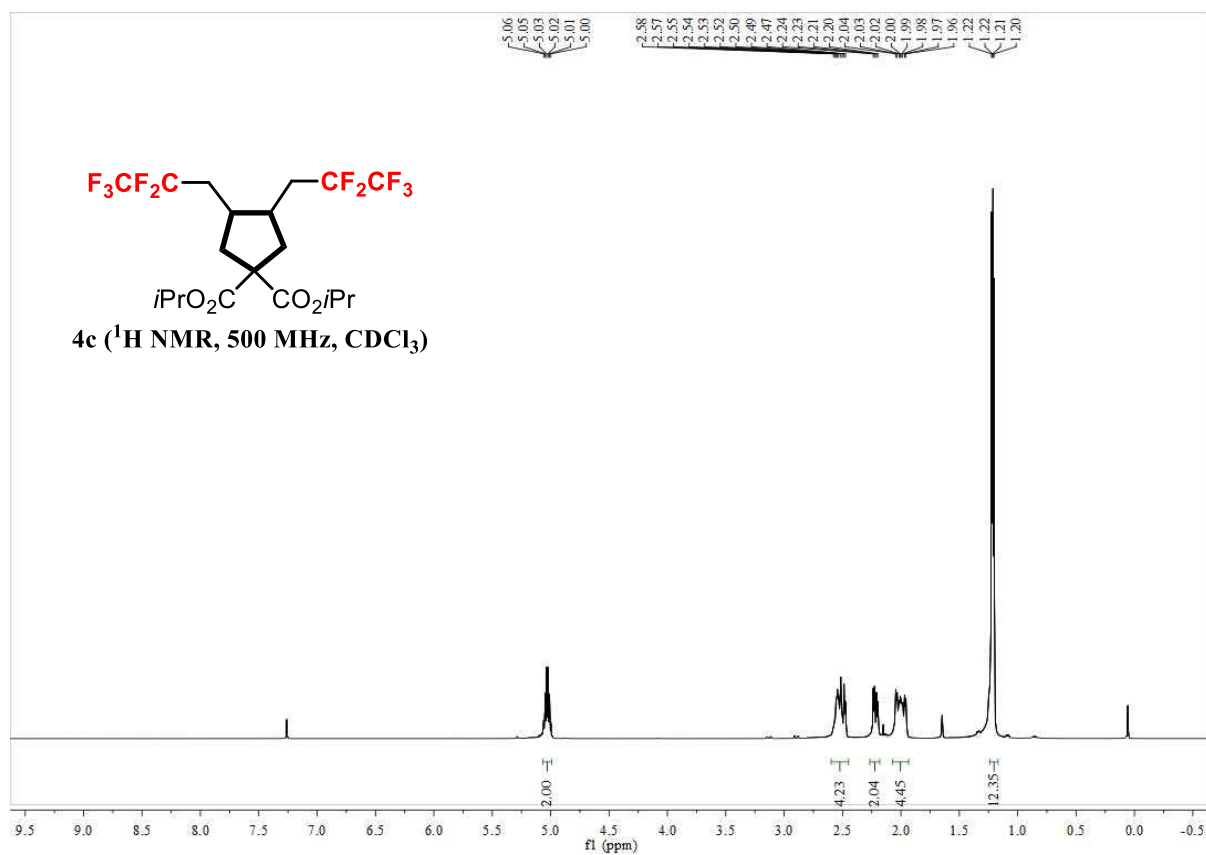

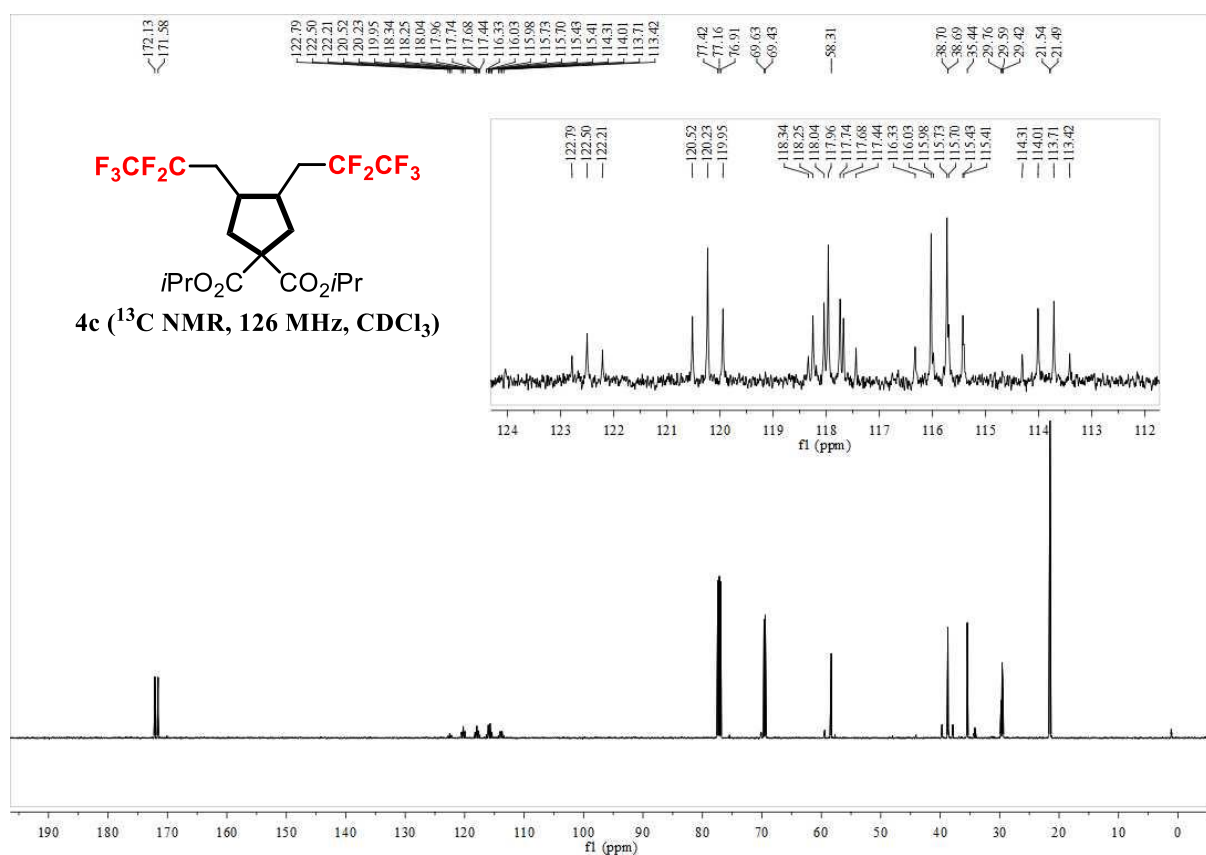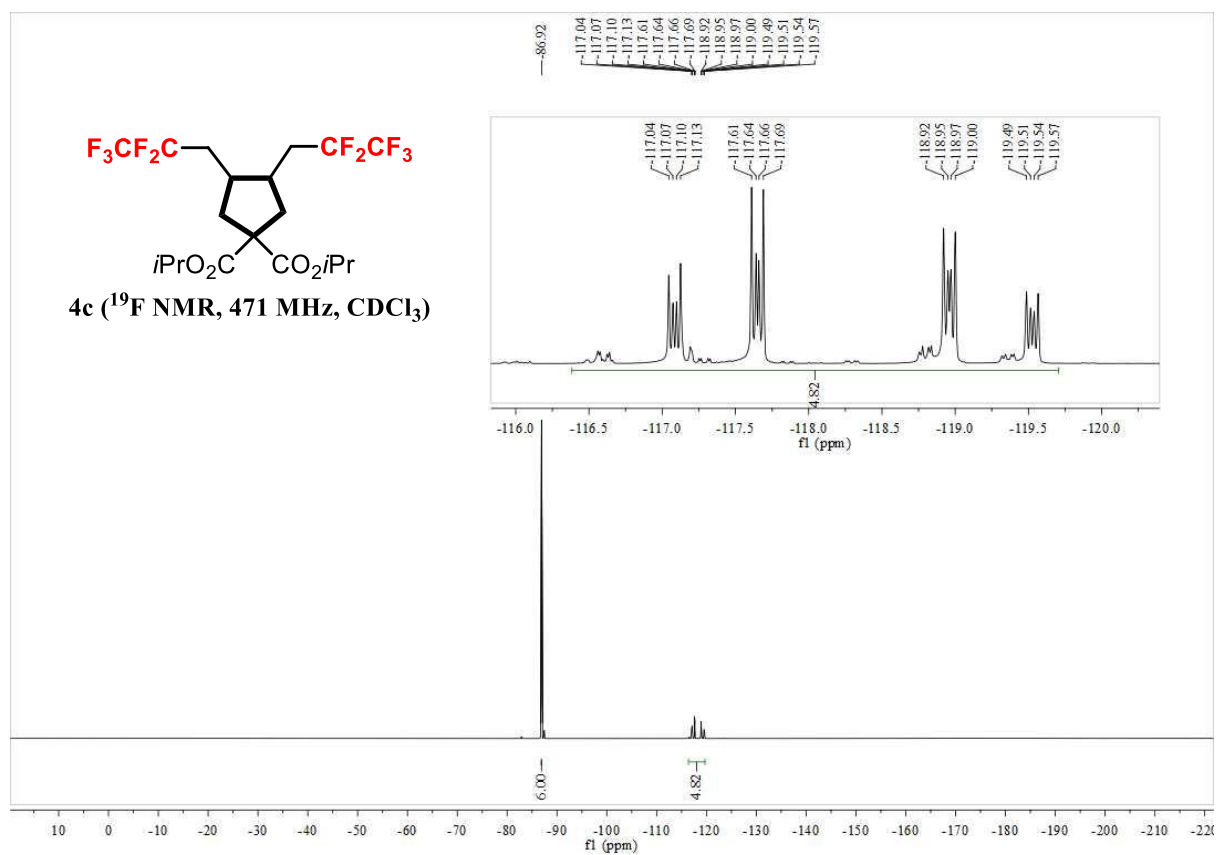





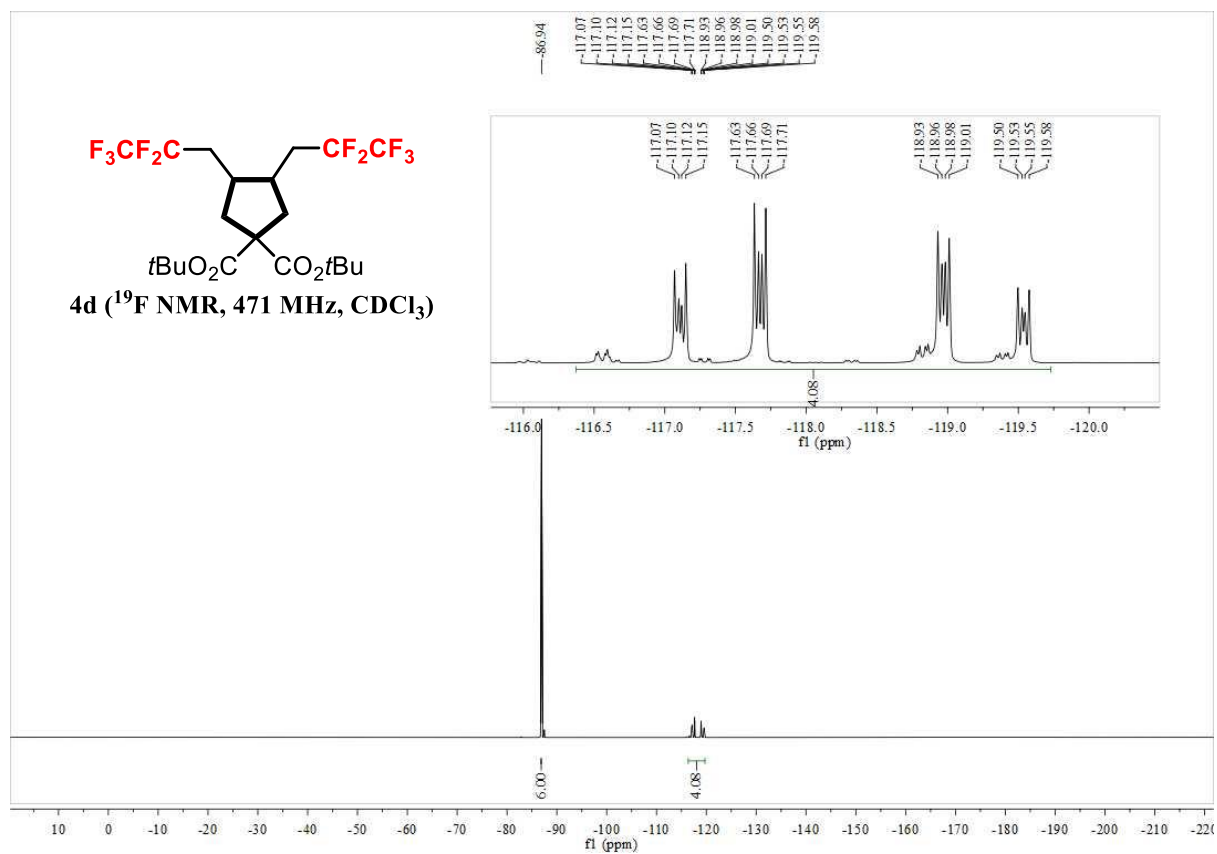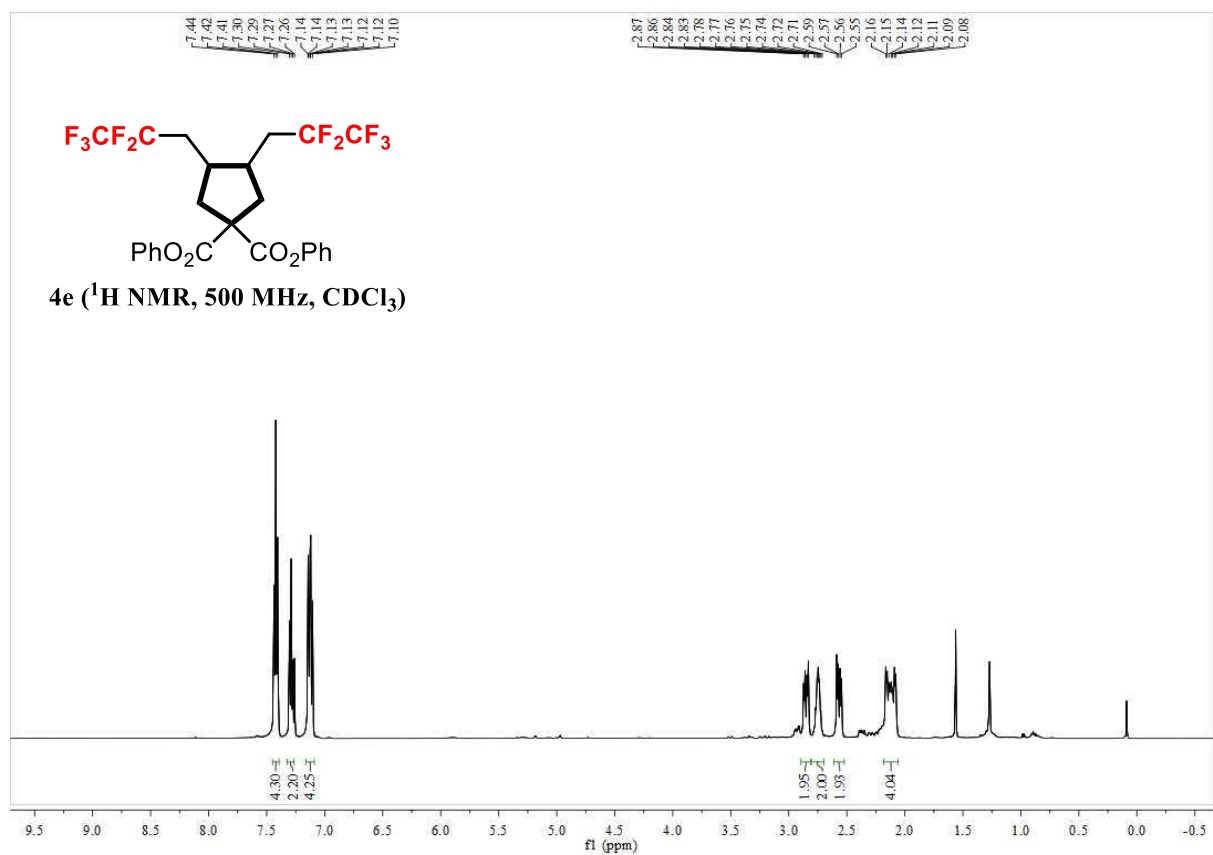

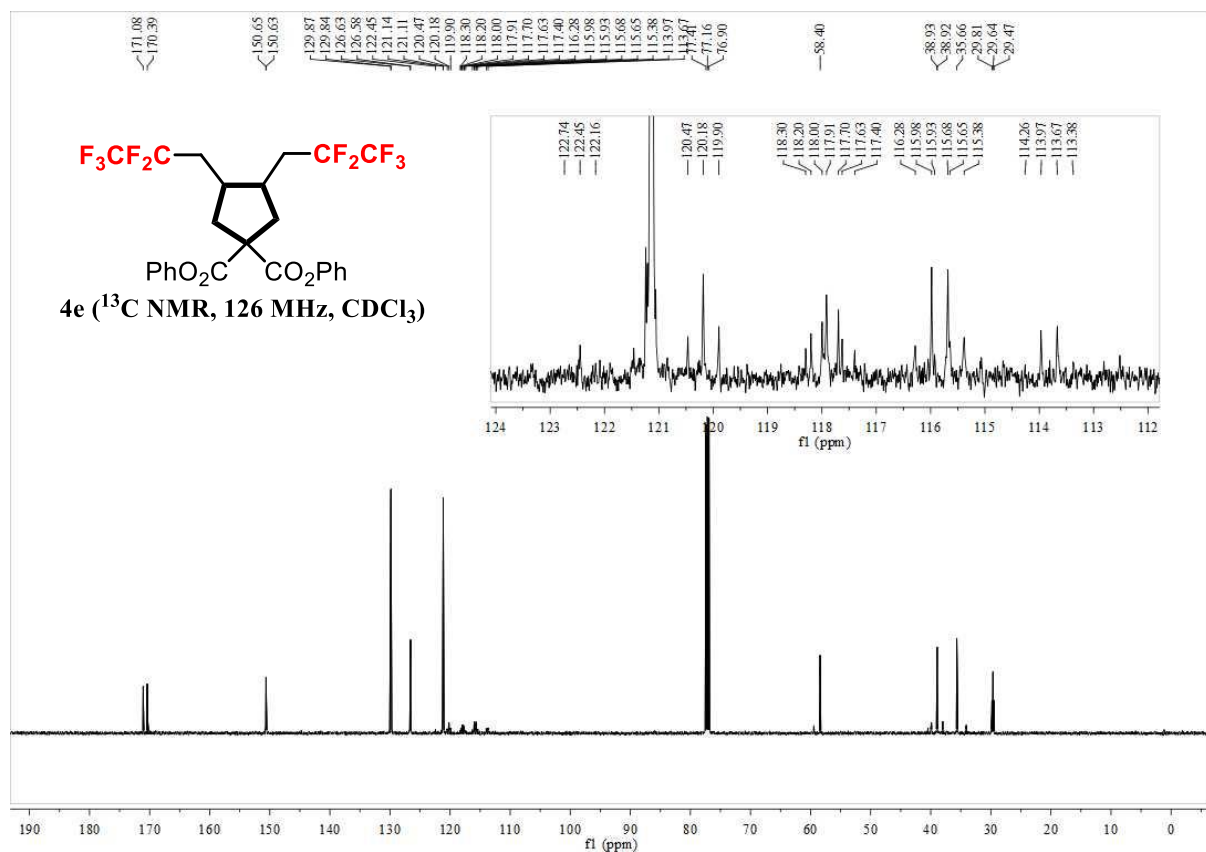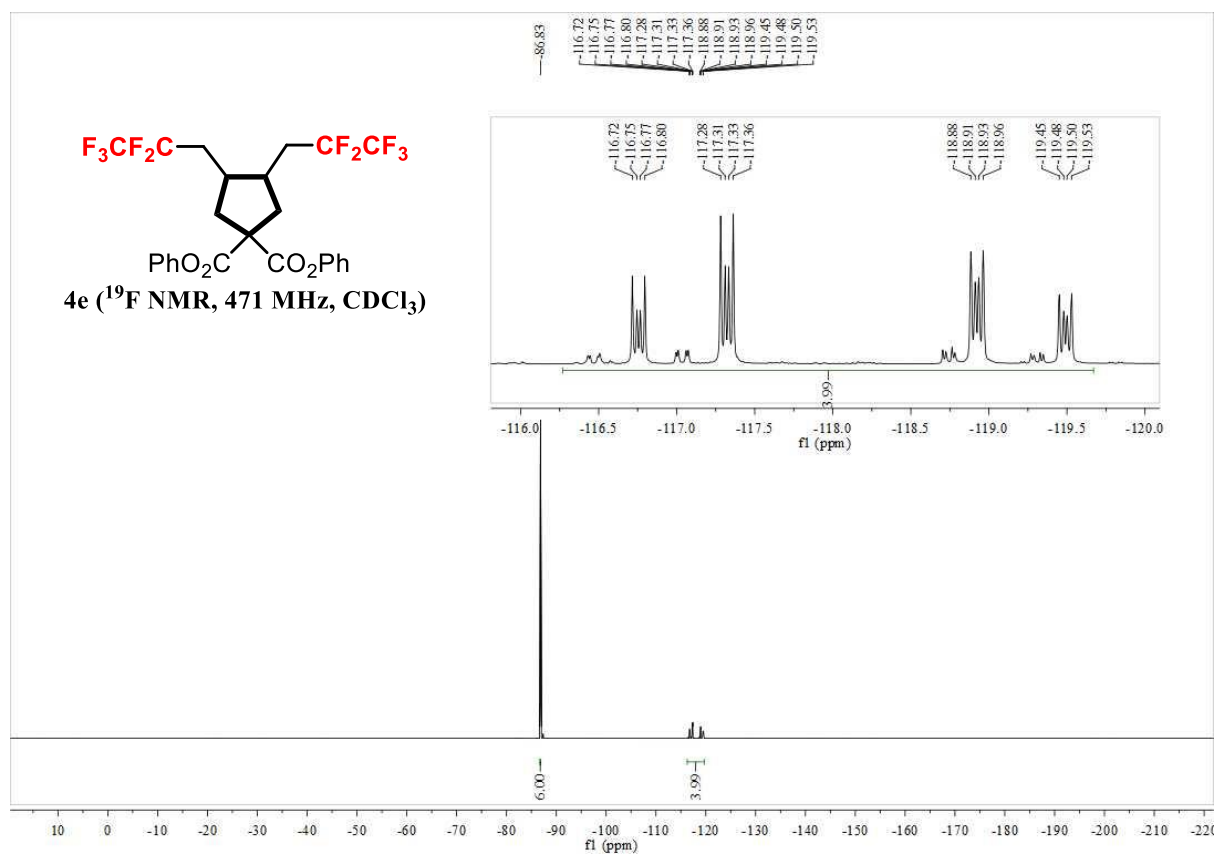

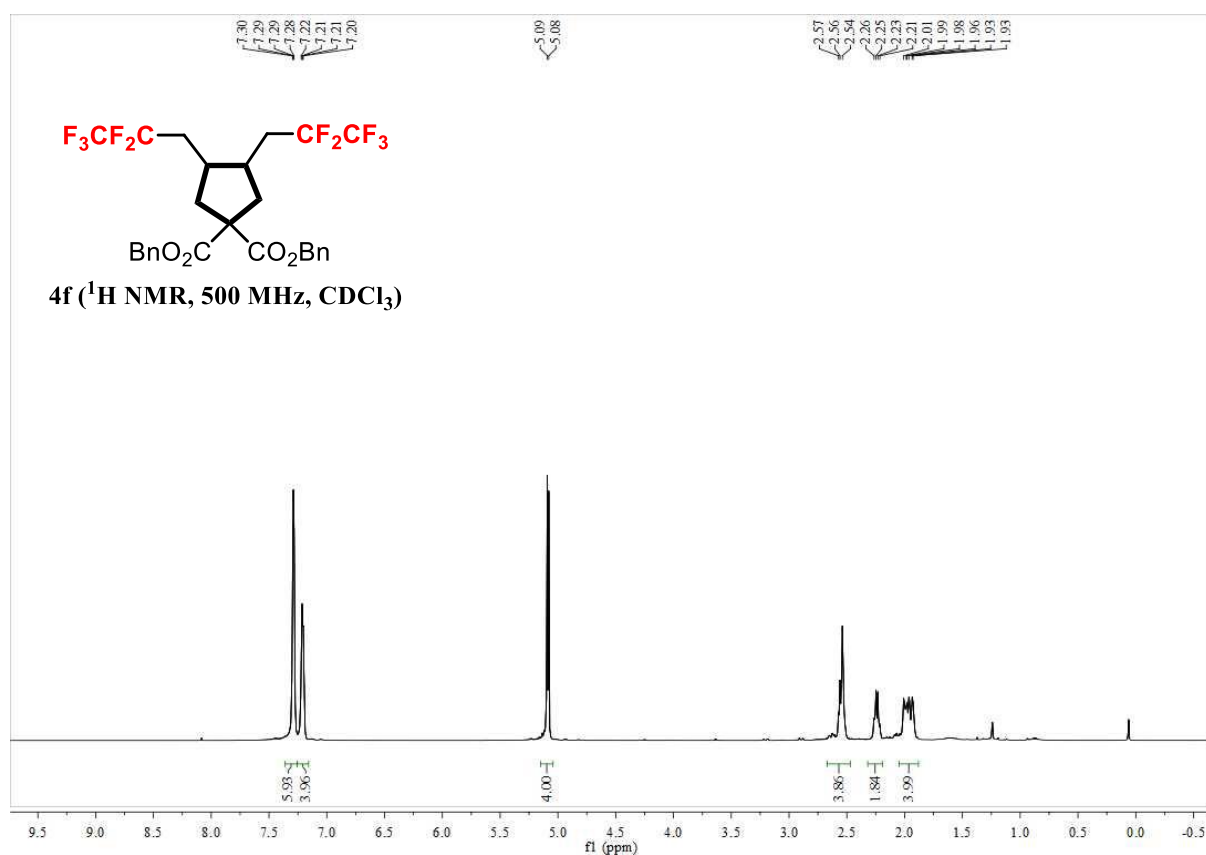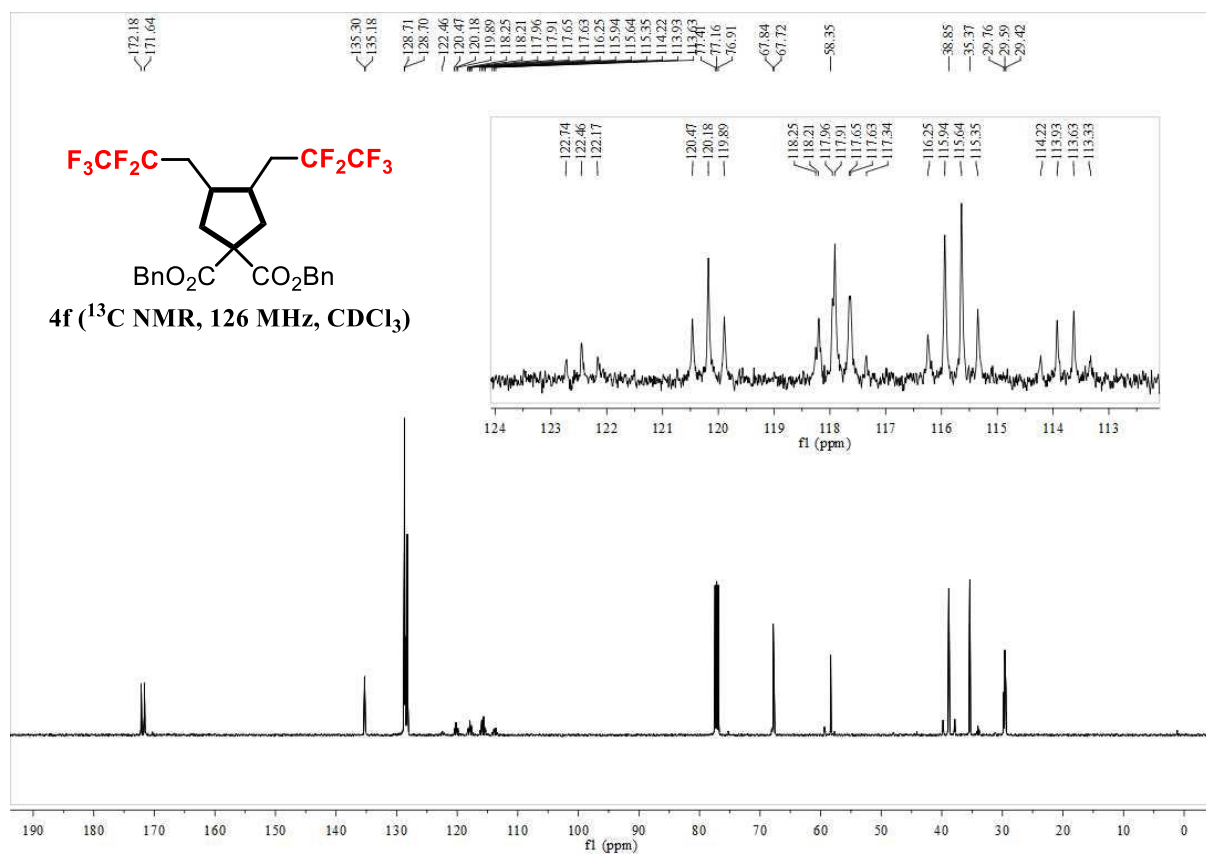



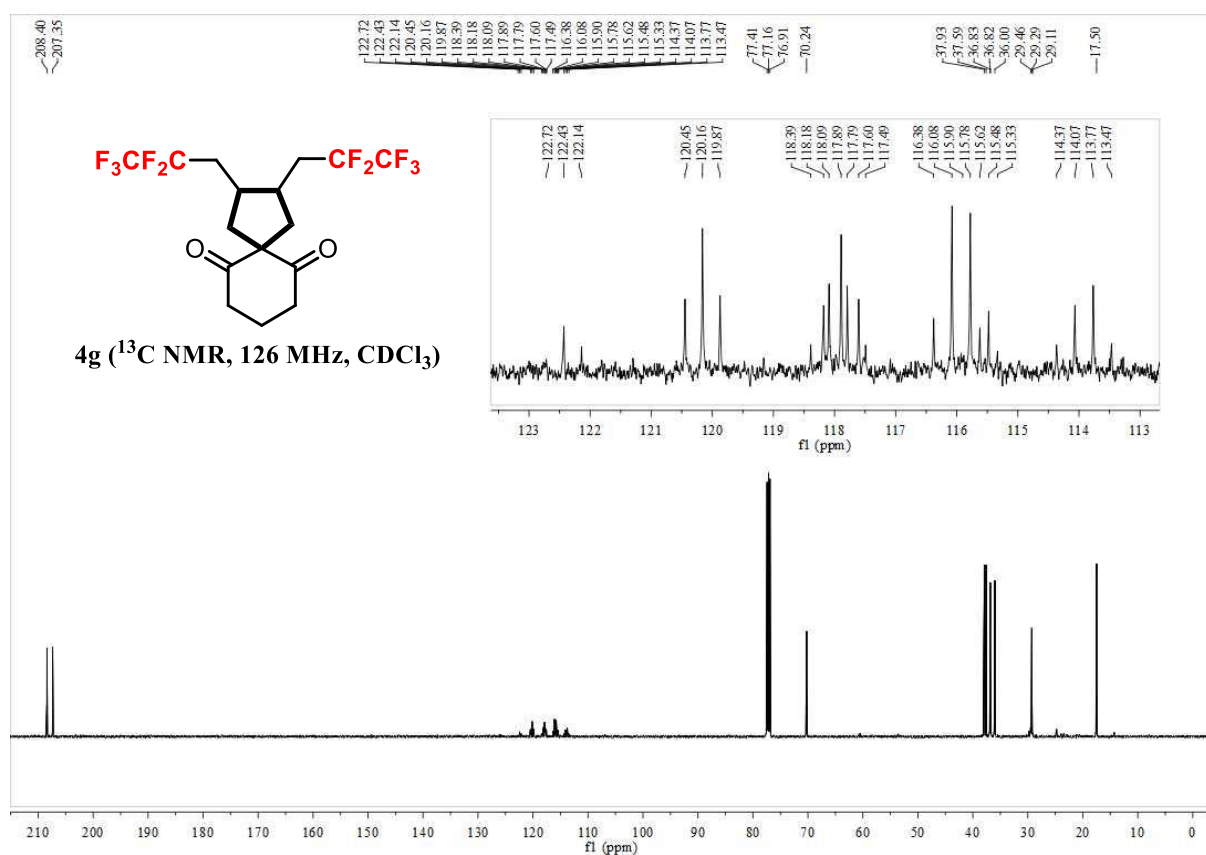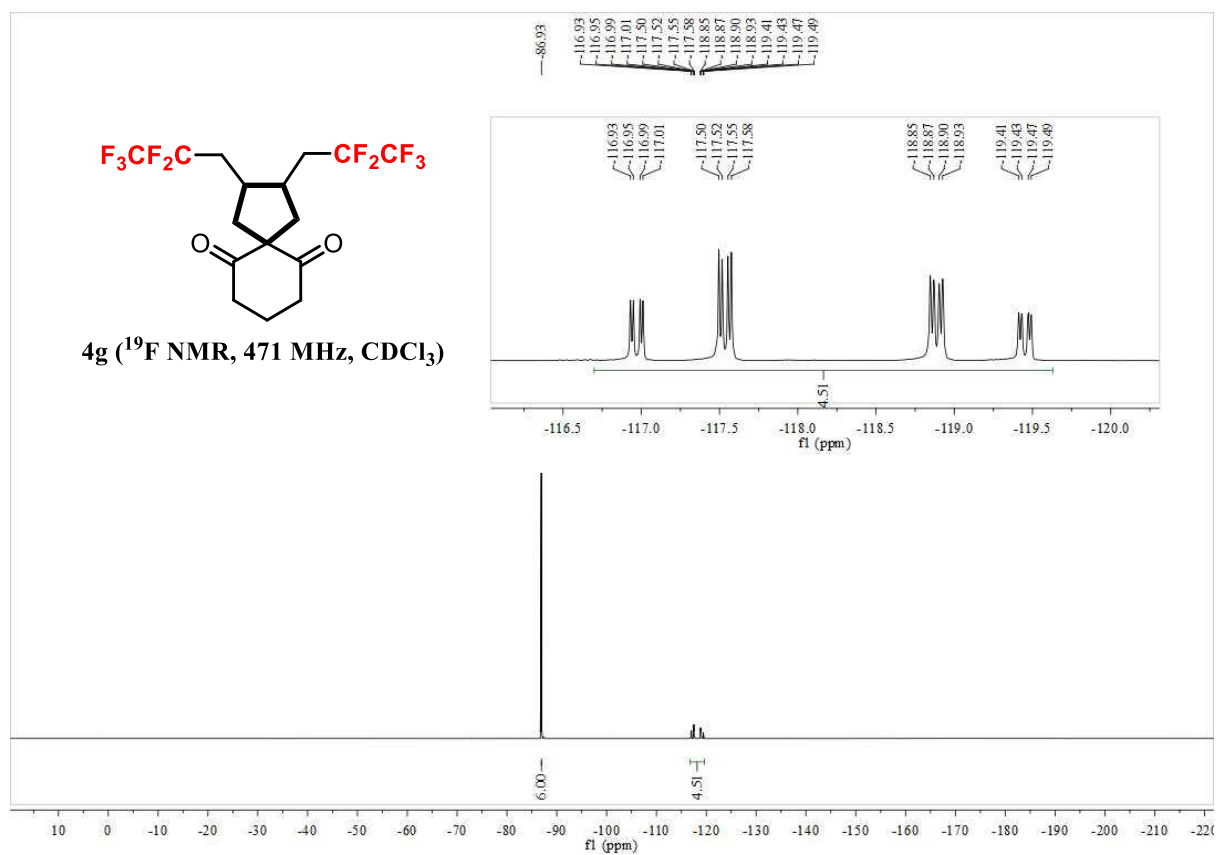

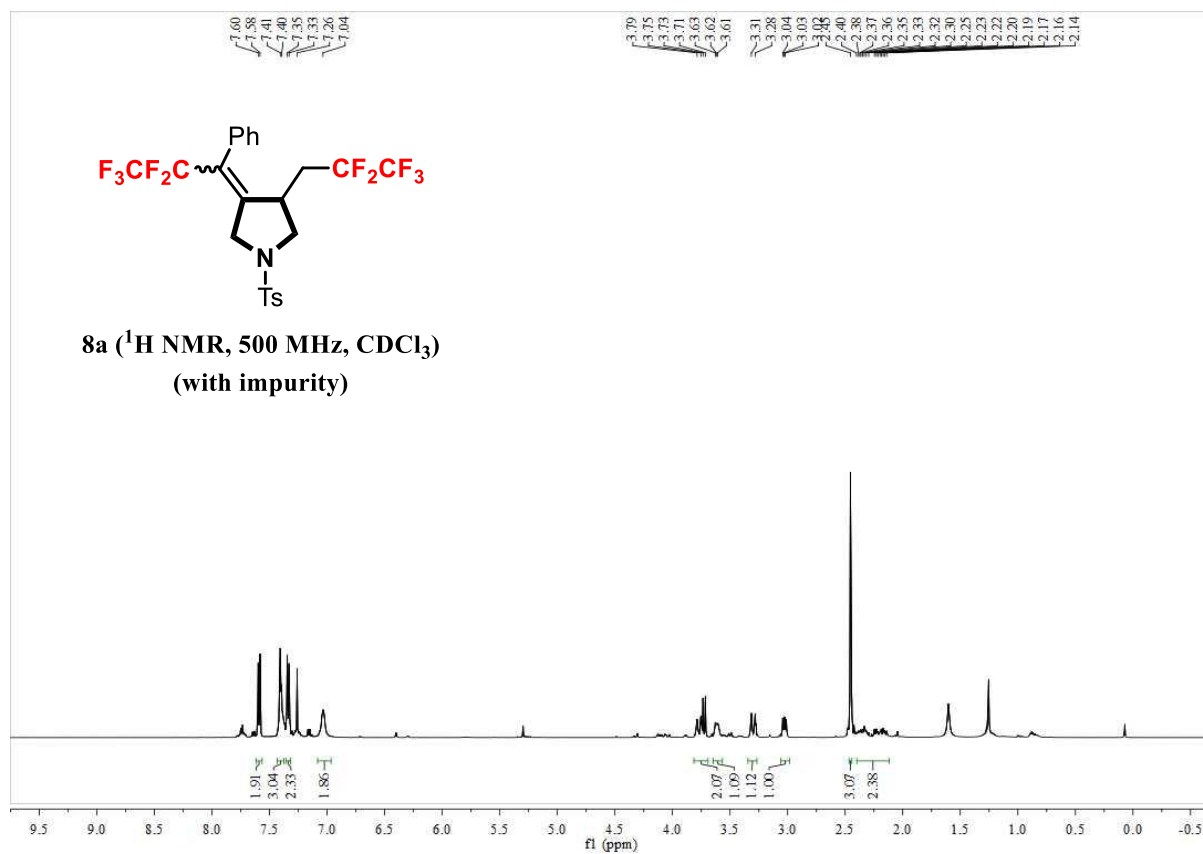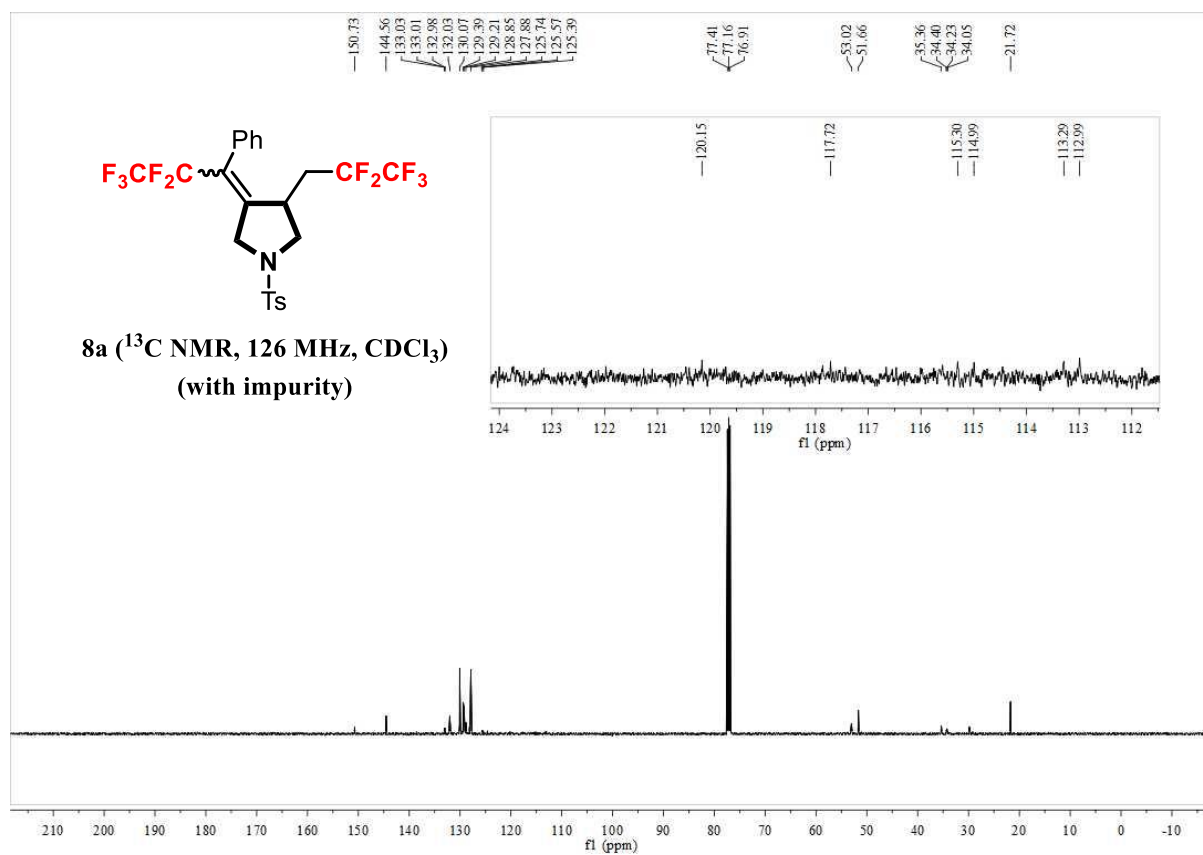

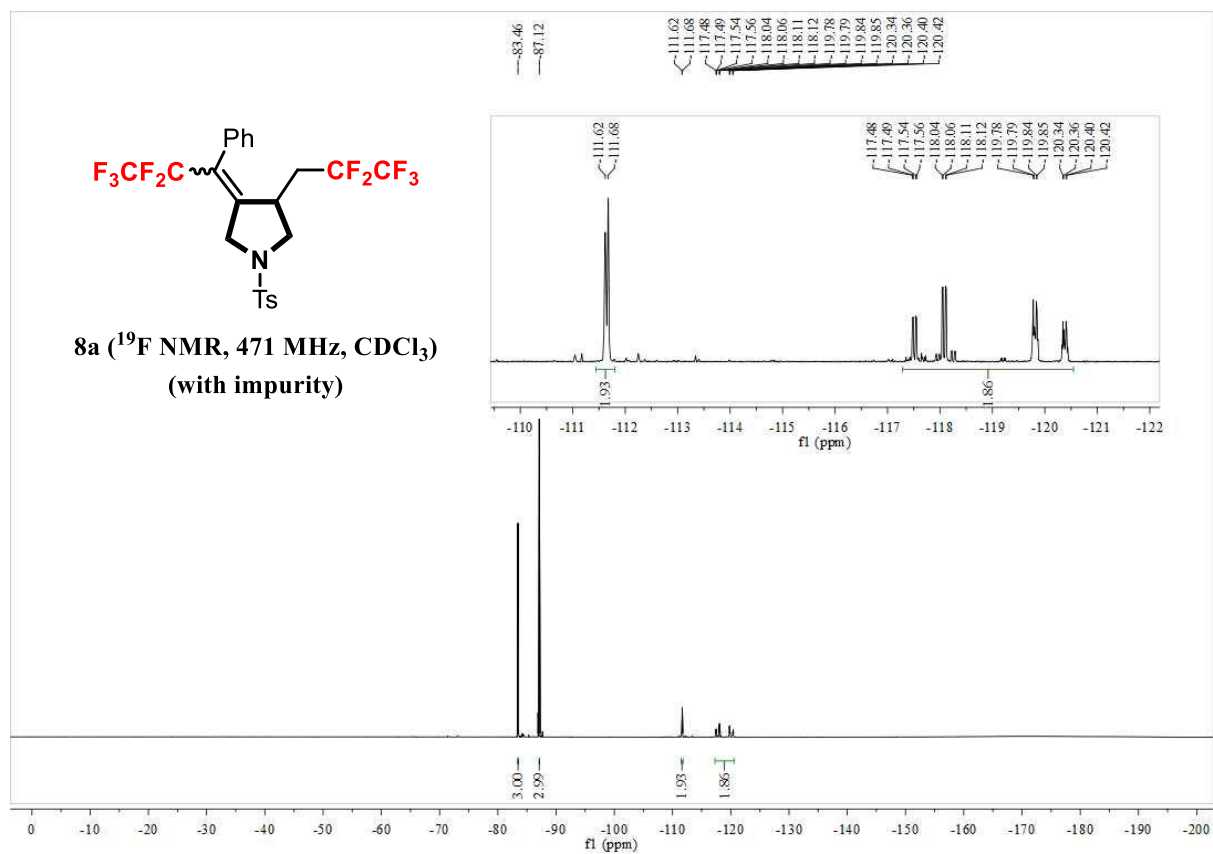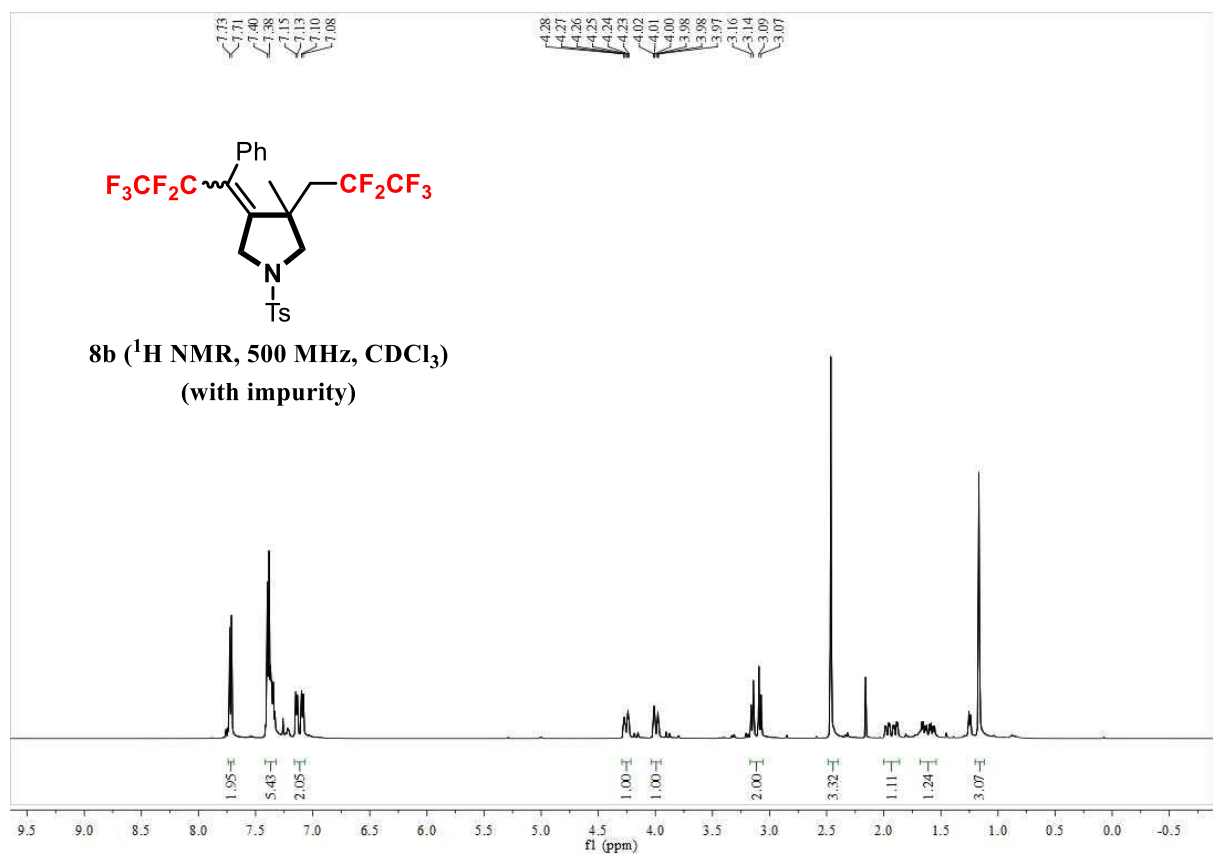

Supplement: d2qo00919f1.pdf [file d2qo00919f1.pdf]
